# Supplementary material for: A photochemical halogen-atom-transfer pathway for the carboxylation of alkenes with CO2
Source: Royal Society of Chemistry journal article supplement (doi:10.1039/d3qo01012k), 2023-01-01

Supporting Information

**A Photochemical Halogen-Atom Transfer Pathway for the  
Carboxylation of Alkenes with CO<sub>2</sub>**

Senmao Zhai,<sup>†</sup> Rong Wang,<sup>†</sup> Quan Dong,<sup>†</sup> Jiajia Cheng,<sup>†,‡</sup> Meifang Zheng<sup>\*,†,‡</sup>, and Xinchen Wang<sup>\*,†,‡</sup>

<sup>†</sup> State Key Laboratory of Photocatalysis on Energy and Environment, College of Chemistry, Fuzhou University, Fuzhou, 350116. P. R. China

<sup>‡</sup> Fujian Science & Technology Innovation Laboratory for Chemical Engineering of China, Quanzhou 362114, China

Email: xcwang@fzu.edu.cn.

## Contents

|                                                                        |    |
|------------------------------------------------------------------------|----|
| 1. General information .....                                           | 3  |
| 2. Starting material synthesis .....                                   | 3  |
| 3. General procedure.....                                              | 4  |
| 4. Mechanism studies.....                                              | 5  |
| 4.1 Radical trapping experiment .....                                  | 5  |
| 4.2 Stern-Volmer emission quenching experiment .....                   | 5  |
| 4.3 Intercepting the carbanion intermediate with D <sub>2</sub> O..... | 7  |
| 4.4 Defluorinative alkylation of trifluoromethylakene .....            | 9  |
| 4.5 Gram-scale synthesis and Product derivatizations .....             | 11 |
| 5. Synthesis and Characterization of Products .....                    | 18 |
| 6. Reference.....                                                      | 38 |
| 7. NMR Spectra .....                                                   | 39 |

## 1. General information

All operations were performed under an argon atmosphere unless otherwise specified. Flash column chromatography was performed over silica gel (200-300 mesh).  $^1\text{H}$  NMR,  $^{13}\text{C}$  NMR, and  $^{19}\text{F}$  NMR spectra were recorded at ambient temperature using JNM-ECZ500R/S1 (500 MHz) spectrometer or JNM-ECZ600R/S1 (600 MHz) spectrometer.  $^1\text{H}$  NMR chemical shifts (in ppm) were referenced to  $\text{CDCl}_3$  ( $\delta = 7.26$  ppm), as internal standards.  $^{13}\text{C}$  NMR spectra were obtained by using the same NMR spectrometers and were calibrated with  $\text{CDCl}_3$  ( $\delta = 77.1$  ppm). The following abbreviations are used: s = singlet, d = doublet, t = triplet, m = multiplet. GCMS data were obtained on SHIMADZU GCMS-QP2020 NX with EI mode. HRMS data were obtained on Thermo Scientific Orbitrap Elite Mass Spectrometer with an ESI source. Analytical thin-layer chromatography (TLC) was carried out on Merck 60 F254 pre-coated silica gel plate (0.2 mm thickness). Visualization was accomplished by UV light (254 nm), phosphomolybdic acid or  $\text{KMnO}_4$  staining solutions followed by heating, also by Gas Chromatograph Mass spectrometer analysis (GC-MS). Unless otherwise noted, materials obtained from commercial suppliers were used without further purification.

## 2. Starting material synthesis

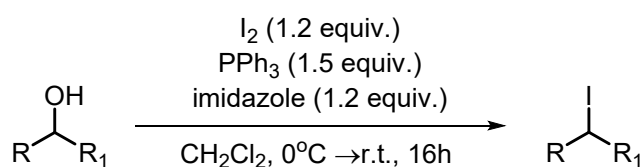

A round-bottom flask equipped with a stirring bar was charged with the alcohol (1.0 equiv.),  $\text{Ph}_3\text{P}$  (1.2 equiv.) and imidazole (1.2 equiv.). The flask was evacuated and refilled with  $\text{N}_2$ .  $\text{CH}_2\text{Cl}_2$  (0.1 M) was added, and the reaction was cooled to  $0^\circ\text{C}$  with an ice-water bath.  $\text{I}_2$  (1.2 equiv.) was added portion-wise and then the cooling bath

was removed. The reaction was stirred 16 hours at room temperature and then diluted with H<sub>2</sub>O. The layers were separated, and the aqueous layer was extracted with CH<sub>2</sub>Cl<sub>2</sub> (x 3 times). The combined organic layers were washed with Na<sub>2</sub>S<sub>2</sub>O<sub>3</sub> sat., brine, dried (Na<sub>2</sub>SO<sub>4</sub>), filtered and evaporated. Purification by flash column chromatography (**1a-1t**) on silica gel or recrystallization (**1u, 1v**) from EtOH gave the products. All the spectra data are in agreement with the reports.<sup>[1-6]</sup>

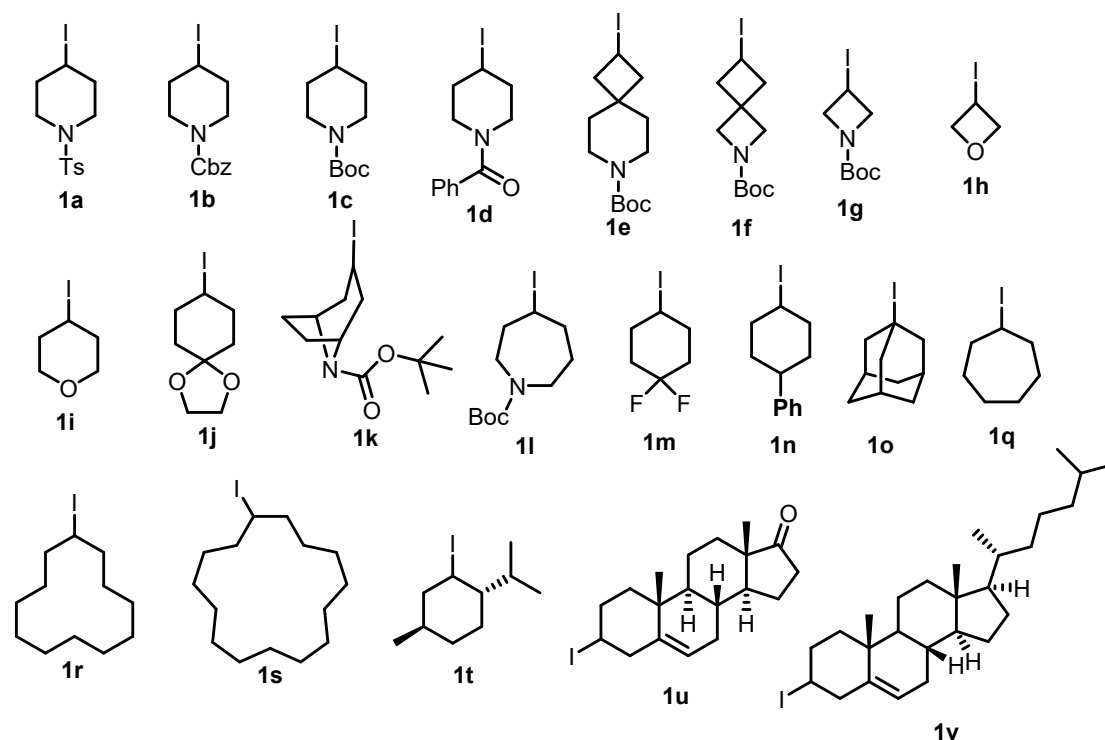

### 3. General procedure

A dry tube equipped with a stirring bar was charged with the photocatalyst (2.5 mmol%), **1a** (73mg, 0.2 mmol, 1.0 equiv.), **2a** (64.8 mg, 0.4 mmol, 2.0 equiv.), the amine (if solid) (0.4 mmol, 2.0 equiv.) and base (0.4 mmol, 2.0 equiv.). Then evacuated under high vacuum and backfilled with N<sub>2</sub> (x 3). Anhydrous DMSO (4 mL), and DIPEA (0.4 mmol, 2.0 equiv.) was added via syringe under CO<sub>2</sub> atmosphere. Once added, the Schlenk tube was sealed at atmospheric pressure of CO<sub>2</sub> (1 balloon). The reaction was stirred and irradiated with a 456nm Kessil LEDs (1 cm away, with cooling fan to keep the reaction at room temperature and keeping the reaction region located in the

center of LED lamp) for 20 hours. The resulting mixture was diluted with 2 mL EA and quenched by 2 mL 2 N HCl, then stirred for 5 min. The reaction mixture was extracted by EtOAc three times and the combined organic phases were concentrated in vacuo. The residue was purified by silica gel flash column chromatography (PE/EA/AcOH 10/1/0.1%~1/1/0.1%) to give the desired products.

**Table S1** Optimization of reaction Conditions.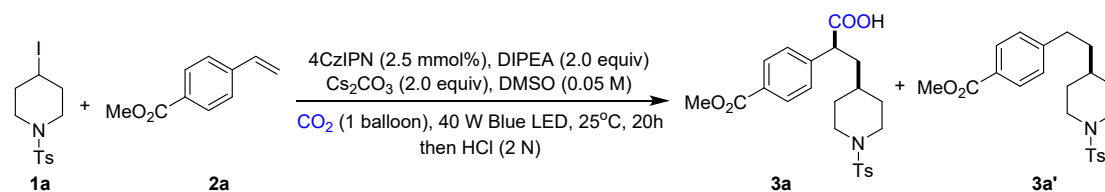

| Entry <sup>[a]</sup> | Variation from standard conditions                                        | Yield of <b>3a</b> [%] <sup>[b]</sup> | Yield of <b>3a'</b> [%] <sup>[c]</sup> |
|----------------------|---------------------------------------------------------------------------|---------------------------------------|----------------------------------------|
| 1                    | none                                                                      | 90 (82)                               | 4                                      |
| 2                    | DMA instead of DMSO                                                       | 86                                    | 5                                      |
| 3                    | MeCN instead of DMSO                                                      | <5                                    | 45                                     |
| 4                    | THF instead of DMSO                                                       | <5                                    | 20                                     |
| 5                    | DMF instead of DMSO                                                       | 79                                    | 12                                     |
| 6                    | CsF instead of Cs <sub>2</sub> CO <sub>3</sub>                            | 82                                    | 4                                      |
| 7                    | K <sub>2</sub> CO <sub>3</sub> instead of Cs <sub>2</sub> CO <sub>3</sub> | 78                                    | 6                                      |

[a] Standard conditions: **1a** (0.2 mmol), **2a** (0.4 mmol), 4CzIPN (2.5 mol%), Cs<sub>2</sub>CO<sub>3</sub> (0.4 mmol), DIPEA (0.4 mmol), DMSO (4 mL), CO<sub>2</sub> (1 balloon), 40 W 456 nm blue LED, 25 °C, quenched with 2N HCl (aq.). "w/o" is short for "without". "N.D." is short for "not detected". [b] Yield was determined by <sup>1</sup>H-NMR with dibromomethane as an internal standard. The isolated yield is given in parentheses. [c] Yield was determined by GC-MS using 1,3,5-trimethoxybenzene as the internal standard.

## 4. Mechanism studies

### 4.1 Radical trapping experiment

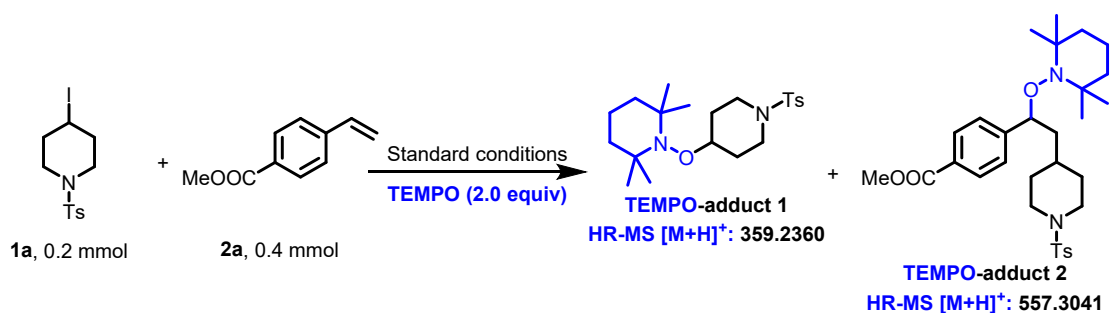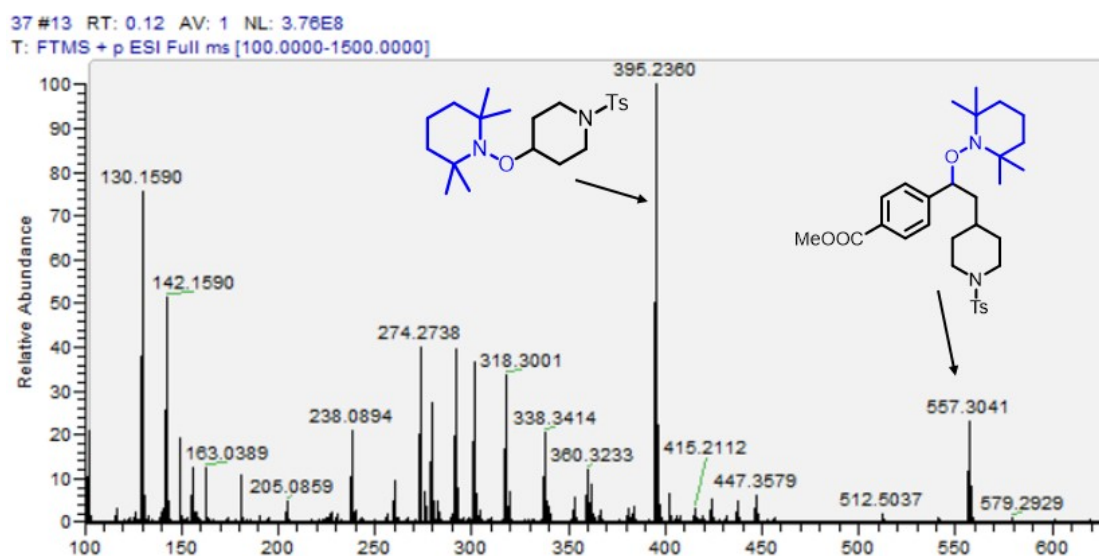

### 4.2 Stern-Volmer emission quenching experiment

Samples for the quenching experiments were prepared in a 4 mL quartz cuvette with a cap. 4CzIPN was irradiated at 440 nm and the emission intensity at about 540nm was observed. In a typical, the emission spectrum of a  $10^{-5}$  M solution of 4CzIPN in DMSO and DMF were collected.

**DIPEA:** A stock solution of DIPEA ( $10^{-3}$  M) in DMF was prepared. Then different amounts of this stock solution were added to the 2 mL of 4CzIPN in DMF ( $10^{-5}$ ).

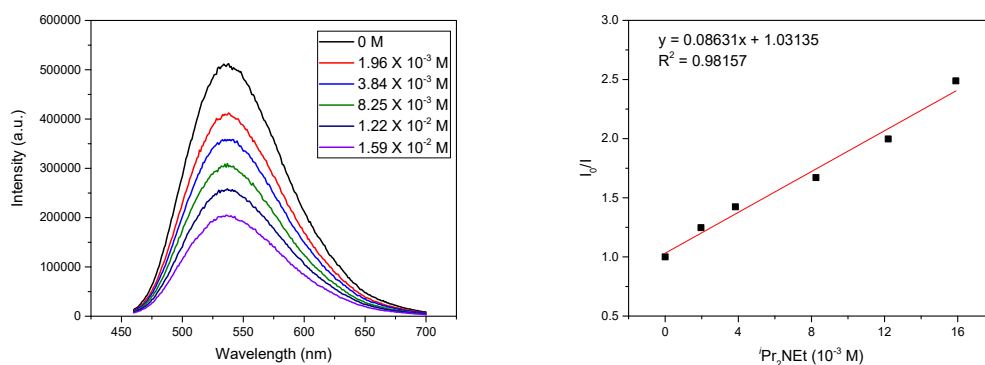

**Figure S1.** Stern-Volmer fluorescence quenching experiments using 4CzIPN with DIPEA

Alkyl iodide **1a**: A stock solution of **1a** (18.25 mg, 0.05 mmol) in 10 mL DMSO was prepared. Different amounts of this stock solution were added to 2 mL of 4CzIPN in DMSO ( $10^{-5}$  M).

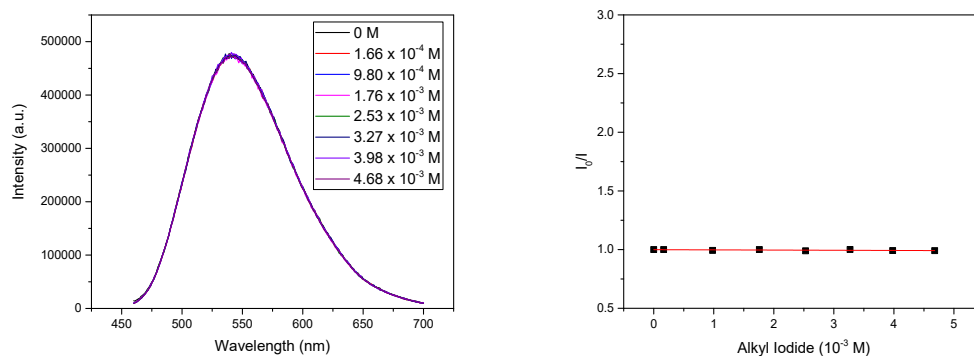

**Figure S2.** Stern-Volmer fluorescence quenching experiments using 4CzIPN with Alkyl iodide **1a**.

A stock solution of **2a** (8.1 mg, 0.05 mmol) in 10 mL DMSO was prepared. Different amounts of this stock solution were added to 2 mL of 4CzIPN in DMSO ( $10^{-5}$  M).



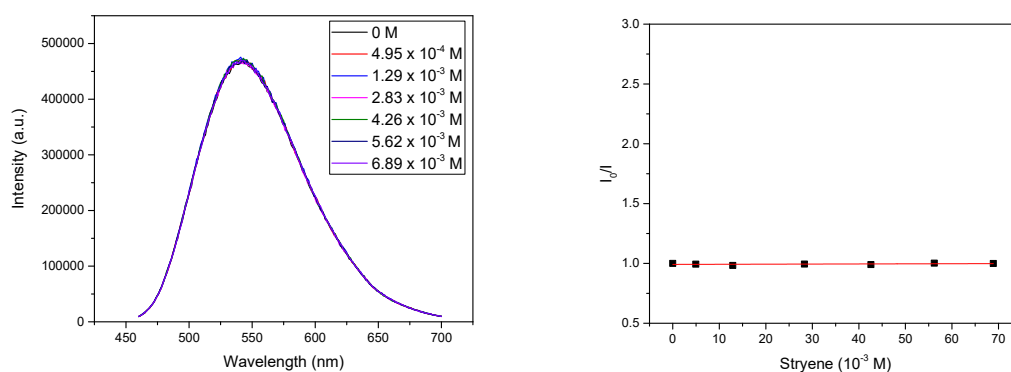

**Figure S3.** Stern-Volmer fluorescence quenching experiments using 4CzIPN with Stryrene.

### 4.3 Intercepting the carbanion intermediate with D<sub>2</sub>O

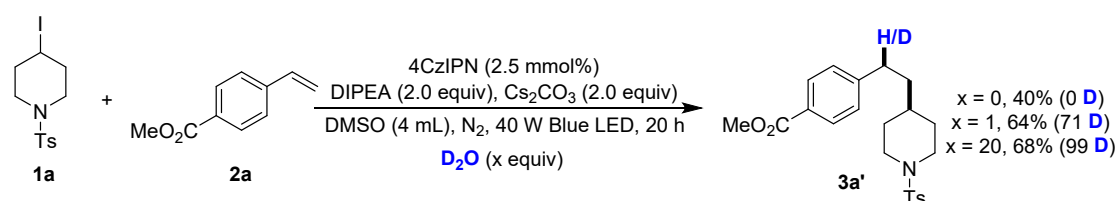

A dry tube equipped with a stirring bar was charged with the photocatalyst (2.5 mmol%), **1a** (73 mg, 0.2 mmol, 1.0 equiv.), **2a** (64.8 mg, 0.4 mmol, 2.0 equiv.), and Cs<sub>2</sub>CO<sub>3</sub> (0.4 mmol, 2.0 equiv.). Anhydrous DMSO (4 mL), D<sub>2</sub>O (x equiv.) and DIPEA (0.4 mmol, 2.0 equiv.) was added. Then evacuated under high vacuum and backfilled with N<sub>2</sub> (x 3 times). The reaction was stirred and irradiated with a 456nm Kessil LEDs (1 cm away, with cooling fan to keep the reaction at room temperature and keeping the reaction region located in the center of LED lamp) for 20 hours. The reaction mixture was extracted by EtOAc six times and the combined organic phases were concentrated in vacuo. The residue was purified by recrystallization from EA.

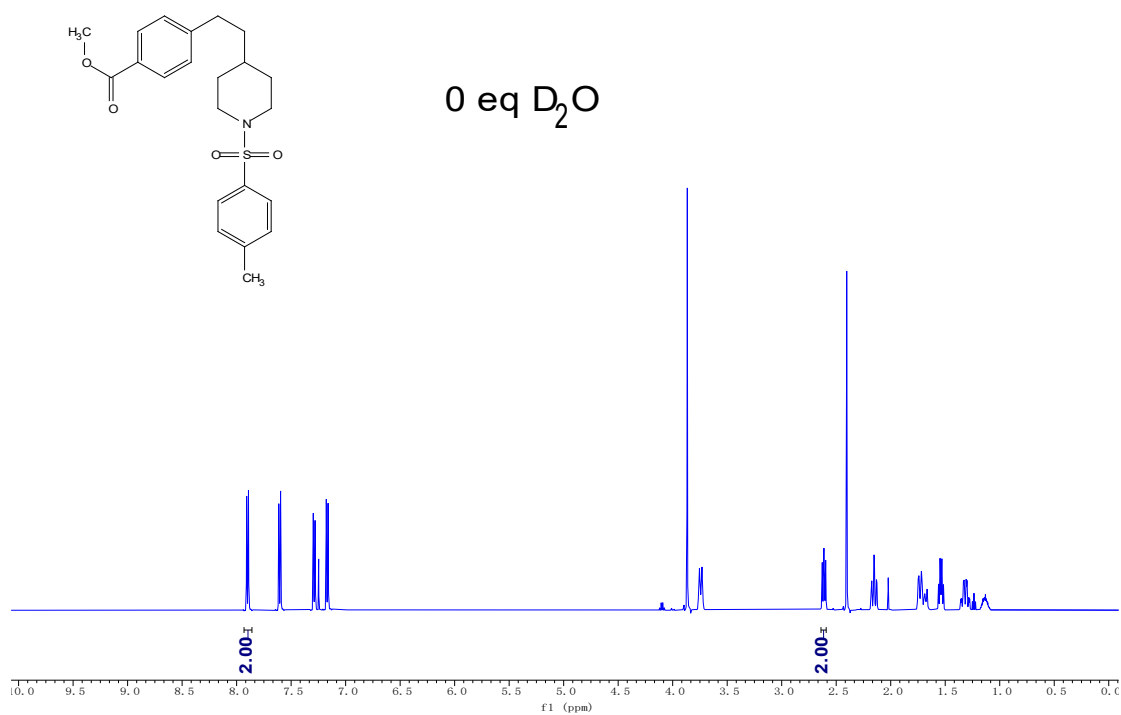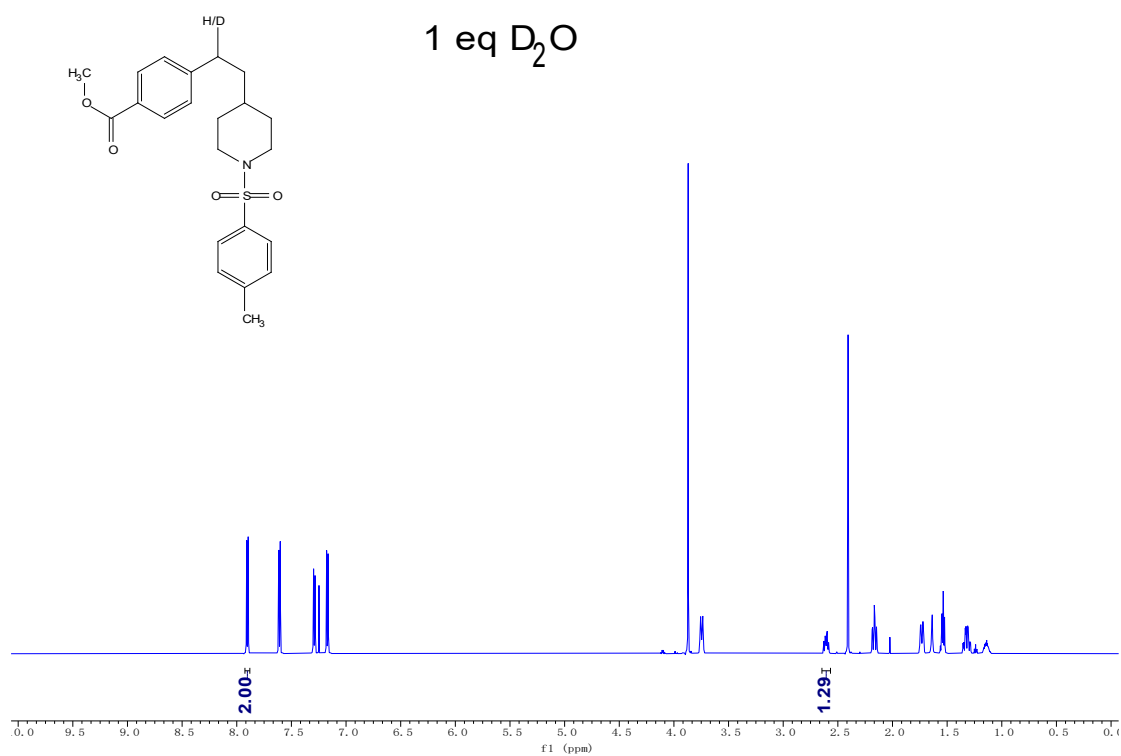

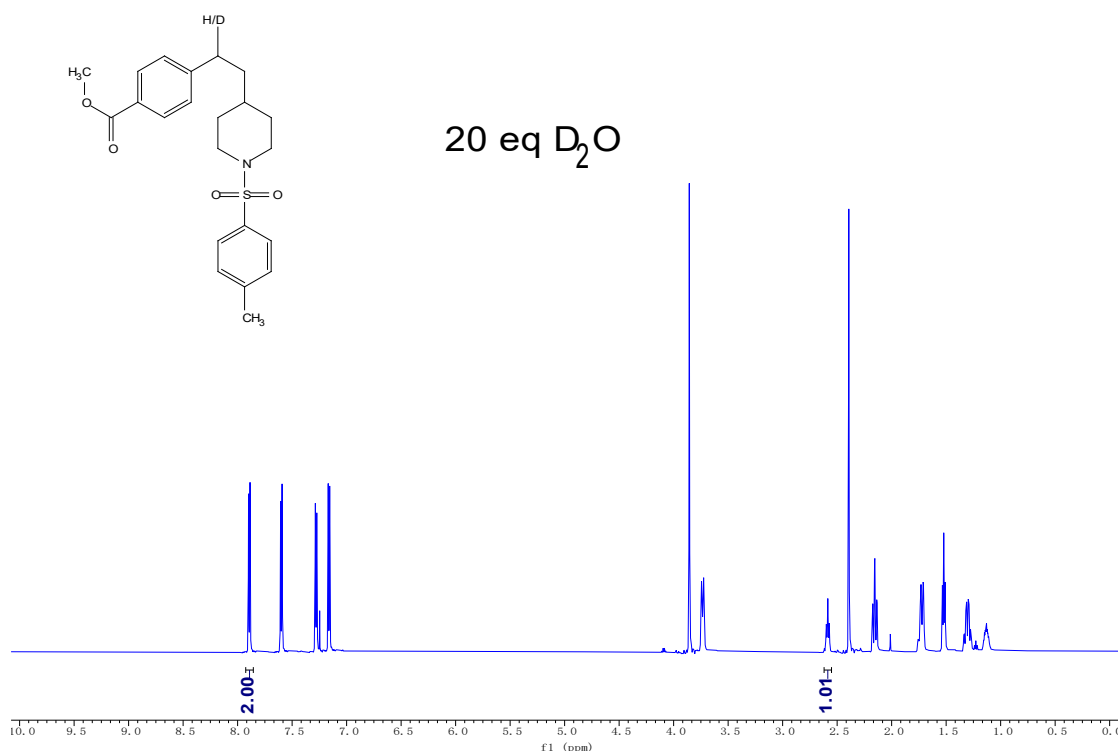

#### 4.4 Defluorinative alkylation of trifluoromethylakene

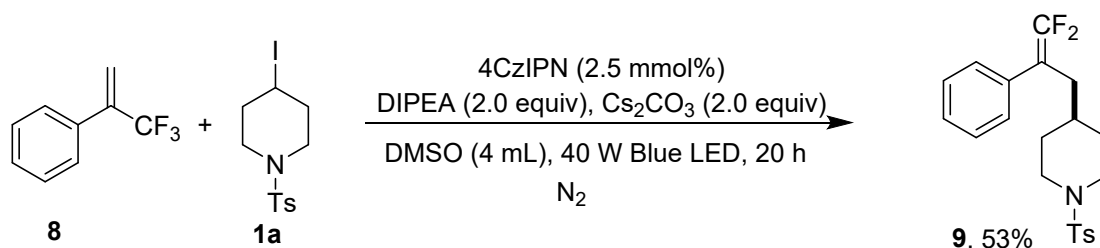

A dry tube equipped with a stirring bar was charged with the photocatalyst (2.5 mmol%), **8** (59  $\mu$ l, 0.4 mmol, 2.0 equiv.), **1a** (73 mg, 0.2 mmol, 1.0 equiv.), and Cs<sub>2</sub>CO<sub>3</sub> (0.4 mmol, 2.0 equiv.). Anhydrous DMSO (4 mL), and DIPEA (0.4 mmol, 2.0 equiv.) was added. Then evacuated under high vacuum and backfilled with N<sub>2</sub> (x 3). The reaction was stirred and irradiated with a 456 nm Kessil LEDs (1 cm away, with cooling fan to keep the reaction at room temperature and keeping the reaction region located in the center of LED lamp) for 20 hours. The reaction mixture was extracted by EtOAc six times and the combined organic phases were concentrated in vacuo. The residue was purified by silica gel flash column chromatography.

$^1\text{H}$  NMR (600 MHz, Chloroform-d)  $\delta$  7.59 (d,  $J = 8.3$  Hz, 2H), 7.35 – 7.30 (m, 2H), 7.28 (d,  $J = 8.1$  Hz, 2H), 7.26 – 7.22 (m, 3H), 3.72 (d,  $J = 11.8$  Hz, 2H), 2.40 (s, 3H), 2.34 – 2.30 (m, 2H), 2.11 – 2.05 (m, 2H), 1.68 (d,  $J = 15.0$  Hz, 2H), 1.39 – 1.26 (m, 2H), 1.24 – 1.11 (m, 1H).

$^{13}\text{C}$  NMR (151 MHz, CHLOROFORM-D)  $\delta$  154.16 (dd,  $J = 291.0, 286.8$  Hz), 143.51, 133.44, 133.13, 129.65, 128.63, 128.21, 127.78, 127.49, 90.39, 46.33, 34.03, 33.47, 31.13, 21.55., 90.39 (dd,  $J = 21.6, 13.6$  Hz).

$^{19}\text{F}$  NMR (565 MHz, Chloroform-d)  $\delta$  -90.46 (d,  $J = 41.3$  Hz), -90.78 (d,  $J = 41.2$  Hz).

HRMS (ESI+)  $[\text{M}+\text{H}]^+$  calculated  $m/z$  for  $[\text{C}_{21}\text{H}_{24}\text{F}_2\text{NO}_2\text{S}]^+$ : 392.1490, found: 392.1483

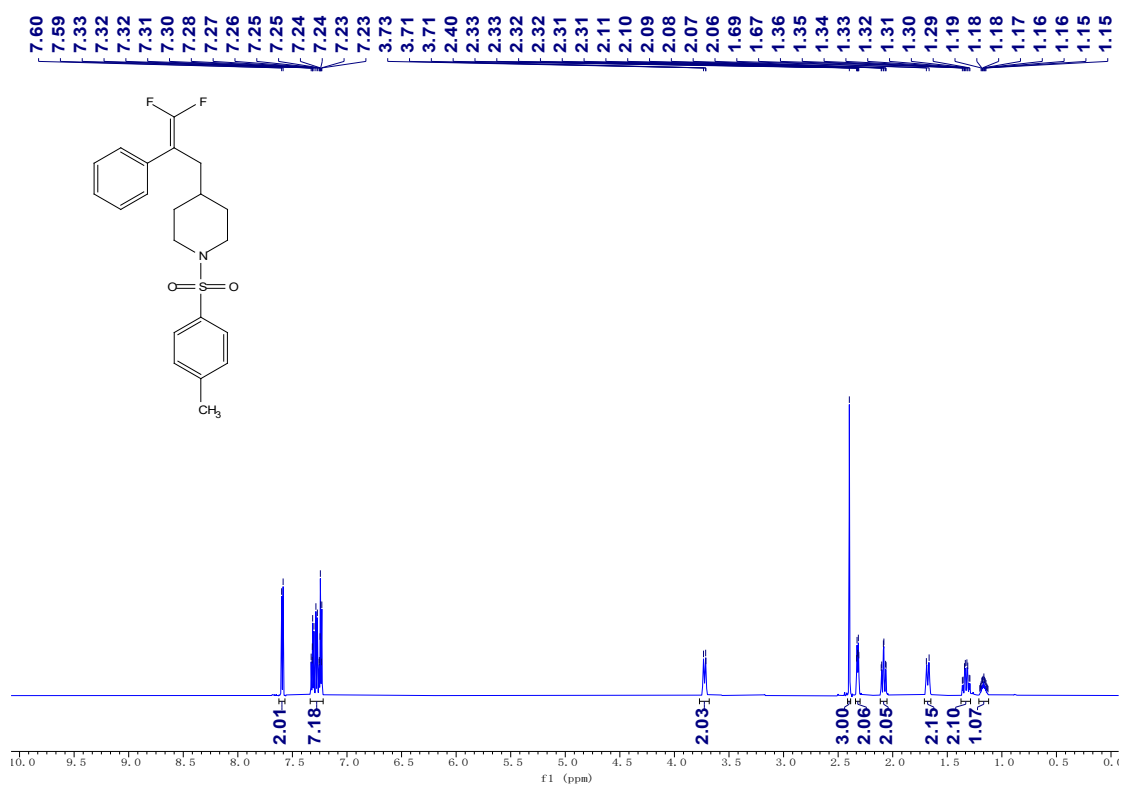

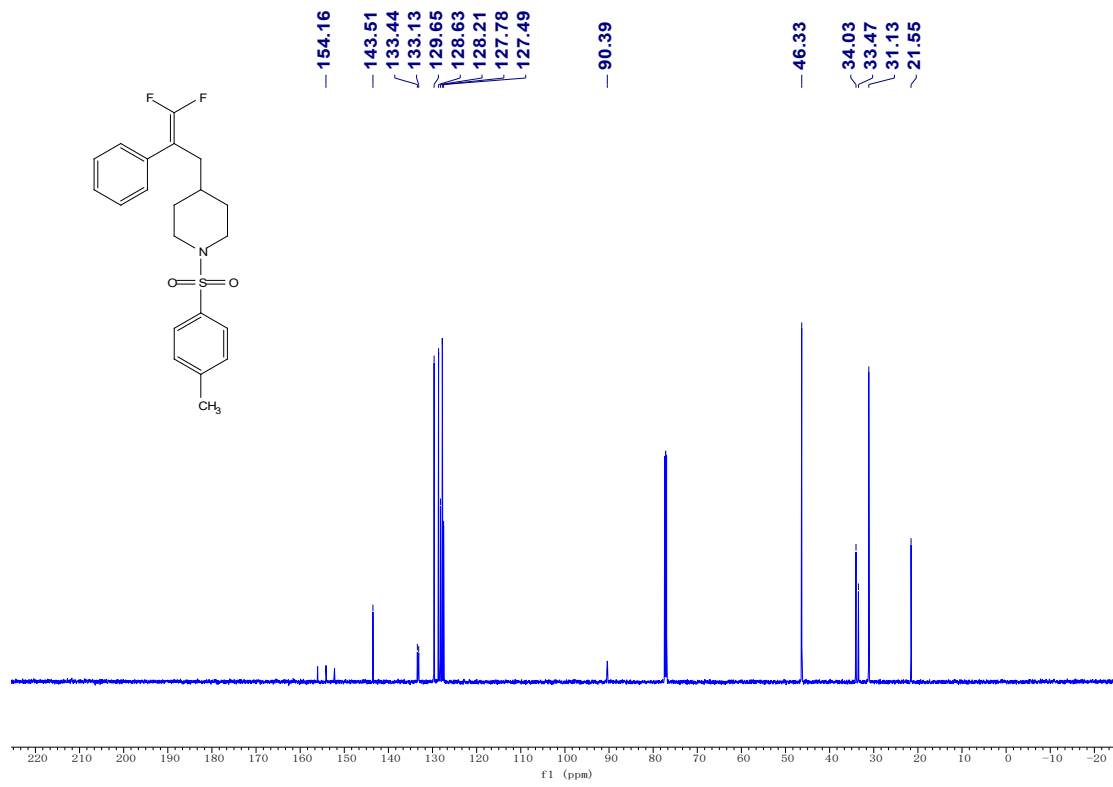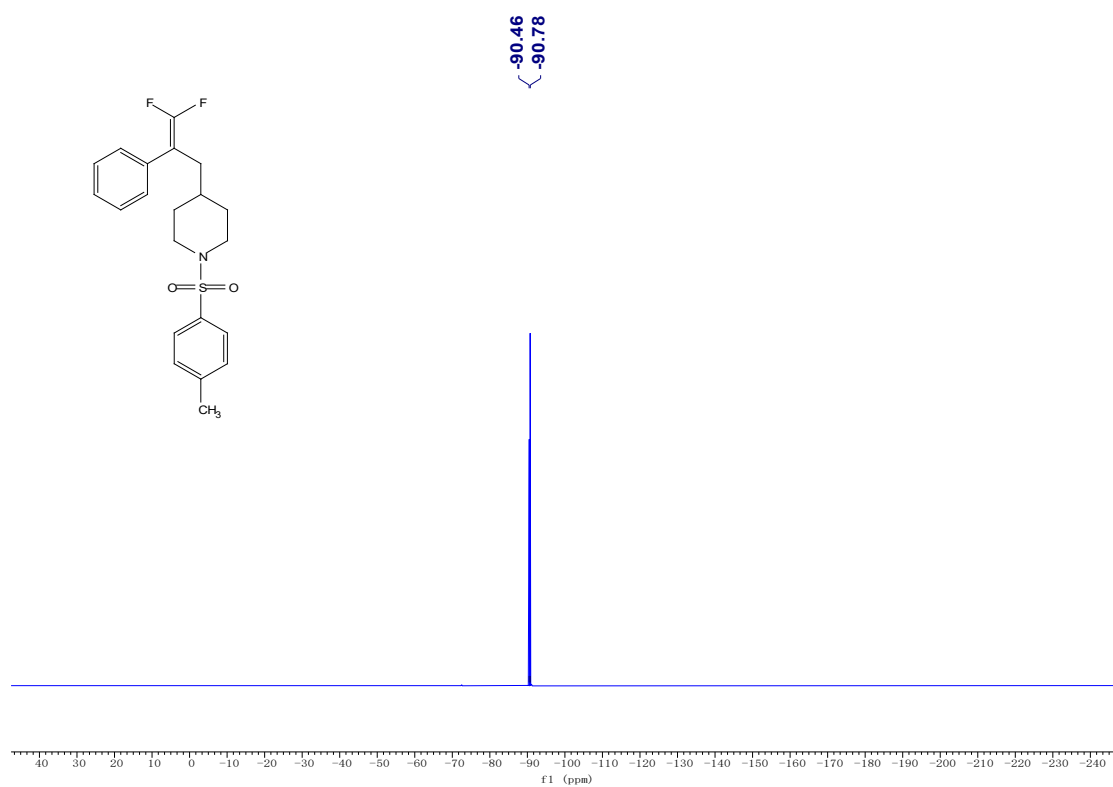

## 4.5 Gram-scale synthesis and Product derivatizations

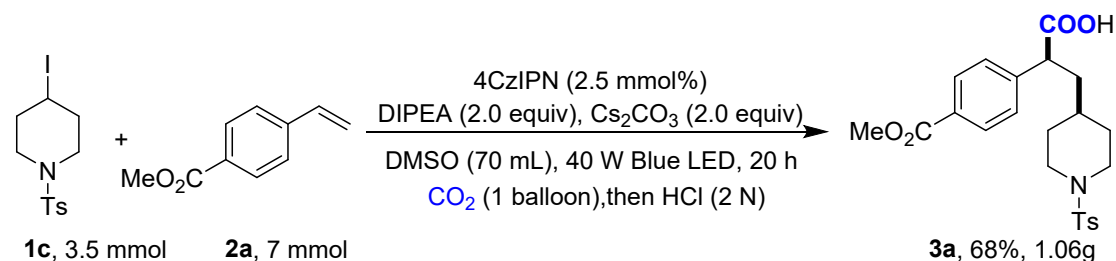

A dry flask equipped with a stirring bar was charged with the photocatalyst (2.5 mmol%), **1a** (3.5 mmol, 1.0 equiv.), **2a** (7 mmol, 2.0 equiv.) and  $\text{Cs}_2\text{CO}_3$  (7 mmol, 2.0 equiv.). Then evacuated under high vacuum and backfilled with  $\text{N}_2$  (x 3 times). Anhydrous DMSO (70 mL), and DIPEA (7 mmol, 2.0 equiv.) was added via syringe under  $\text{CO}_2$  atmosphere. Once added, the flask was sealed at atmospheric pressure of  $\text{CO}_2$  (1 balloon). The reaction was stirred and irradiated with 50 W Blue LEDs (1 cm away, with cooling fan to keep the reaction at room temperature and keeping the reaction region located in the center of LED lamp) for 20 hours. The resulting mixture was diluted with 70 mL EA and quenched by 70 mL 2 N HCl, then stirred for 10 min. The reaction mixture was extracted by EtOAc six times and the combined organic phases were concentrated in vacuo. The residue was purified by recrystallization (PE/EtOAc), resulting in the formation of 1.06 g of the final product (**3a**).

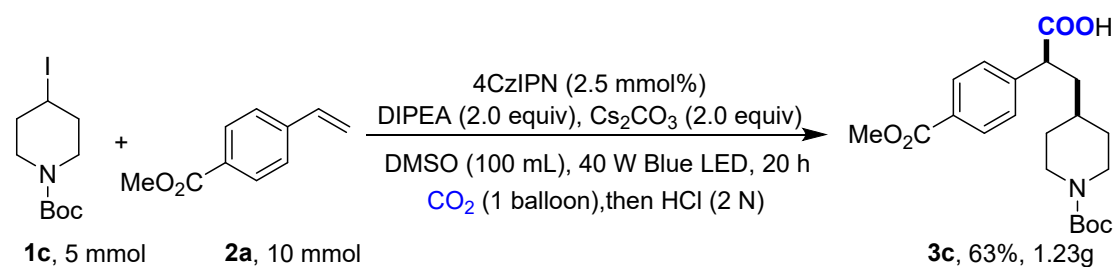

A dry flask equipped with a stirring bar was charged with the photocatalyst (2.5 mmol%), **1c** (5 mmol, 1.0 equiv.), **2a** (10 mmol, 2.0 equiv.) and  $\text{Cs}_2\text{CO}_3$  (10 mmol, 2.0 equiv.). Then evacuated under high vacuum and backfilled with  $\text{N}_2$  (x 3 times). Anhydrous DMSO (100 mL), and DIPEA (10 mmol, 2.0 equiv.) was added via syringe under  $\text{CO}_2$  atmosphere. Once added, the flask was sealed at atmospheric pressure of

CO<sub>2</sub> (1 balloon). The reaction was stirred and irradiated with 40 W Blue LEDs (1 cm away, with cooling fan to keep the reaction at room temperature and keeping the reaction region located in the center of LED lamp) for 20 hours. The resulting mixture was diluted with 100 mL EA and quenched by 70 mL 2 N HCl, then stirred for 10 min. The reaction mixture was extracted by EtOAc six times and the combined organic phases were concentrated in vacuo. The residue was purified by silica gel flash column chromatography.

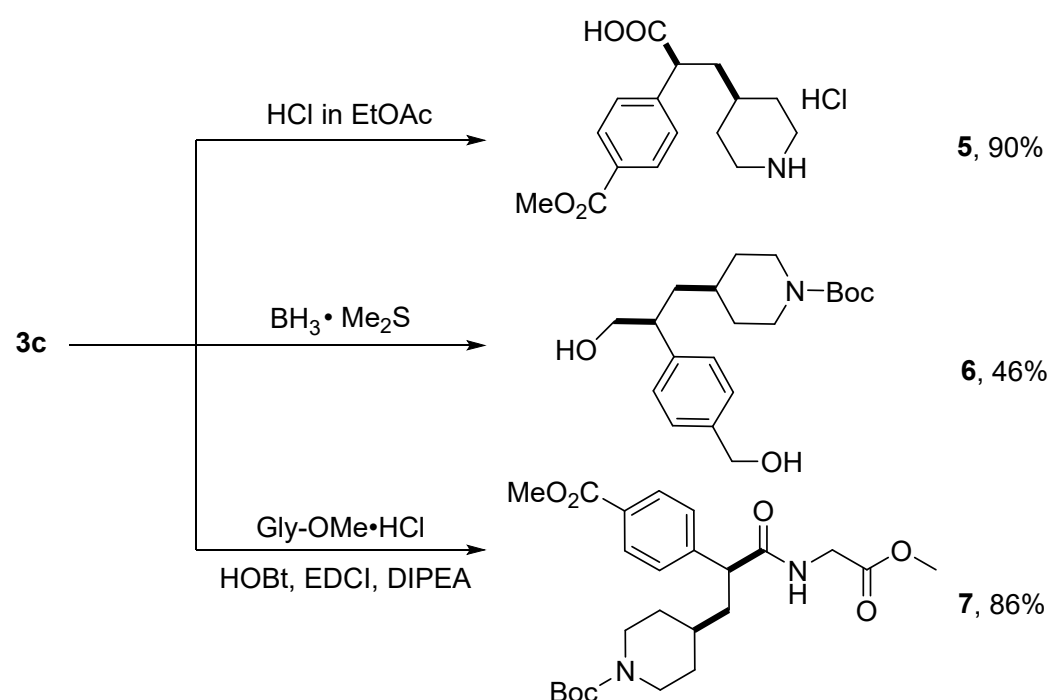

**Figure S4.** Product derivatizations

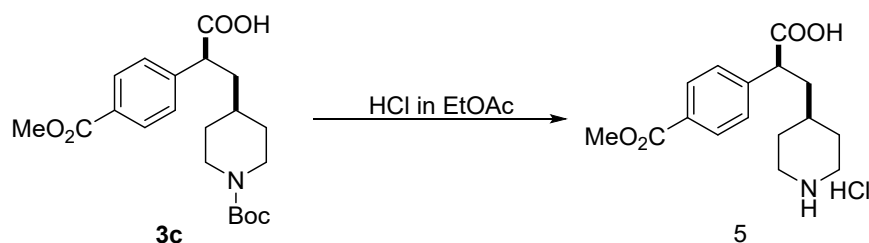

A dry tube equipped with a stirring bar was charged with **3c** (1 mmol, 391mg). HCl (2 M in EtOAc, 20 mL) was added via syringe. The reaction was stirred at room temperature for 12h. The mixture was filtered and washed with EtOAc to give the final product as a white solid (295 mg, 0.902 mmol, 90%). <sup>1</sup>H NMR (600 MHz, D<sub>2</sub>O) δ 7.64

(d,  $J = 8.1$  Hz, 1H), 7.19 (d,  $J = 8.1$  Hz, 1H), 3.69 (s, 1H), 3.65 (t,  $J = 7.7$  Hz, OH), 3.27 – 3.19 (m, 1H), 2.71 – 2.64 (m, 1H), 1.88 – 1.76 (m, 1H), 1.69 (d,  $J = 13.1$  Hz, 1H), 1.62 – 1.55 (m, 1H), 1.34 – 1.16 (m, 1H).  $^{13}\text{C}$  NMR (151 MHz,  $\text{D}_2\text{O}$ )  $\delta$  177.26, 168.63, 144.22, 129.92, 128.52, 128.21, 52.60, 48.23, 43.85, 43.81, 38.07, 30.98, 28.40, 27.83

**HRMS (ESI+)**  $[\text{M}+\text{H}]^+$  calculated  $m/z$  for  $[\text{C}_{12}\text{H}_{22}\text{NO}_4]^+$ : 292.1543, found: 292.1534



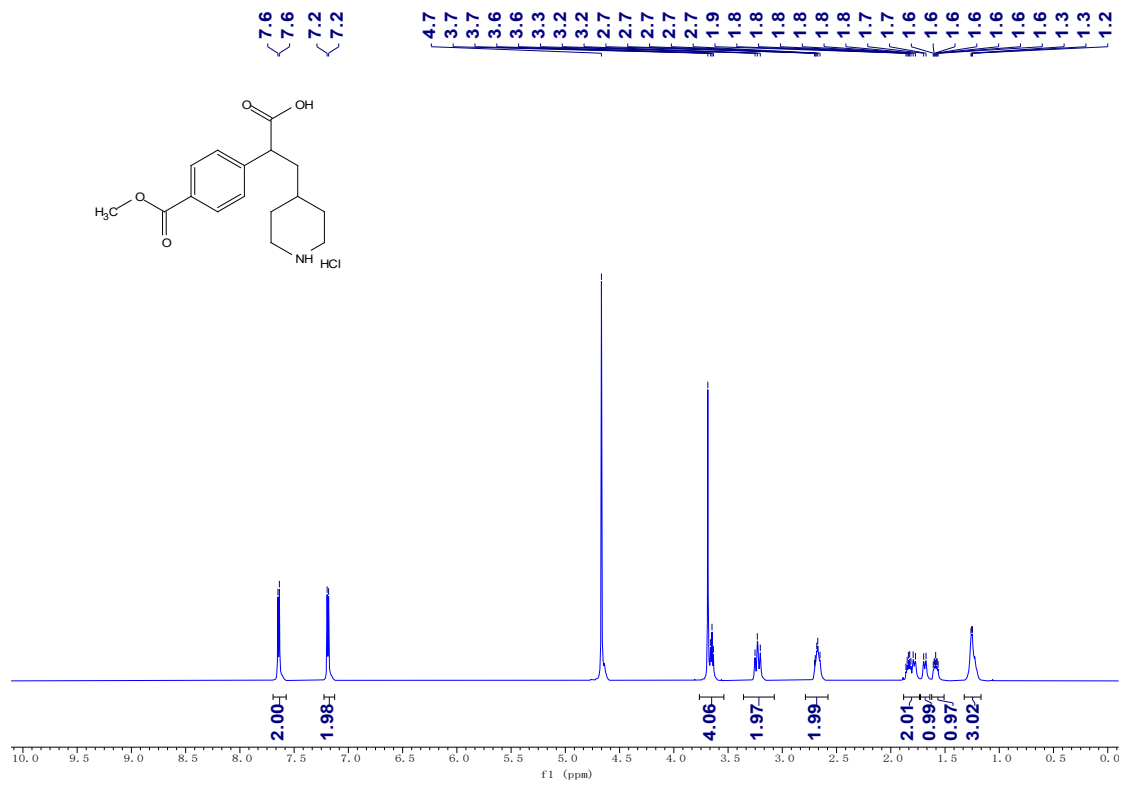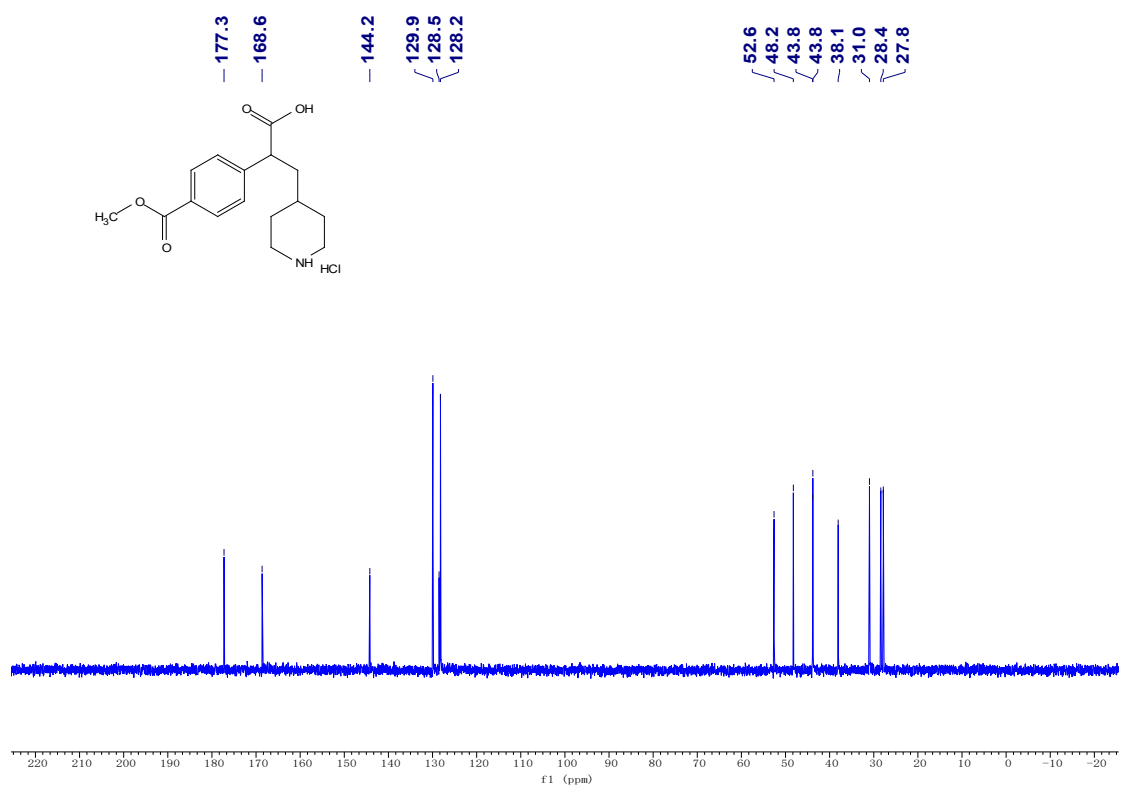

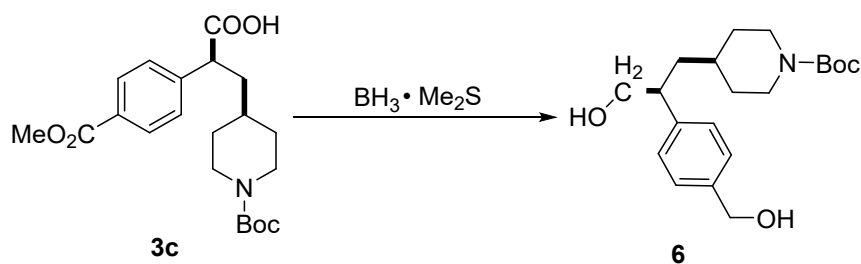

To a 0 °C solution of **3c** (117mg, 0.3 mmol, 1.0 equiv) in 3.0 mL of THF is slowly added under N<sub>2</sub> the BH<sub>3</sub>·Me<sub>2</sub>S (1.0 mL, 2.0 M in THF). The solution is stirred at room temperature during 22 h more. The solution is then cooled to 0 °C and 6 mL of water is slowly added. The organic layer is extracted with 6 mL EtOAc for three times, washed with 10 mL of brine, 10 mL of aqueous NaHCO<sub>3</sub>, 10 mL of H<sub>2</sub>O and finally 10 mL of brine. The organic layer is then dried on Na<sub>2</sub>SO<sub>4</sub>, filtered and evaporated. Final purification by flash chromatography gave the final product as white solid (48.5 mg, 0.138 mmol, 46%). <sup>1</sup>H NMR (600 MHz, Chloroform-*d*) δ 7.28 – 7.24 (m, 1H), 7.15 – 7.11 (m, 1H), 4.56 (s, 1H), 3.94 (dd, *J* = 25.9, 13.3 Hz, 2H), 3.59 (q, *J* = 7.2 Hz, 1H), 2.89 – 2.80 (m, 1H), 2.68 – 2.35 (m, 5H), 1.66 (d, *J* = 13.7 Hz, 1H), 1.59 – 1.48 (m, 1H), 1.45 (d, *J* = 14.3 Hz, 1H), 1.40 (s, 4H), 1.25 – 1.13 (m, 1H), 1.11 – 0.93 (m, 1H). <sup>13</sup>C NMR (151 MHz, CHLOROFORM-*D*) δ 154.89, 141.47, 139.52, 128.07, 127.38, 79.35, 67.82, 64.66, 45.13, 43.79, 38.66, 33.08, 32.93, 31.42, 28.42.

**HRMS (ESI+)** [M+H]<sup>+</sup> calculated m/z for [C<sub>20</sub>H<sub>32</sub>NO<sub>4</sub>]<sup>+</sup>: 350.2326, found: 350.2320

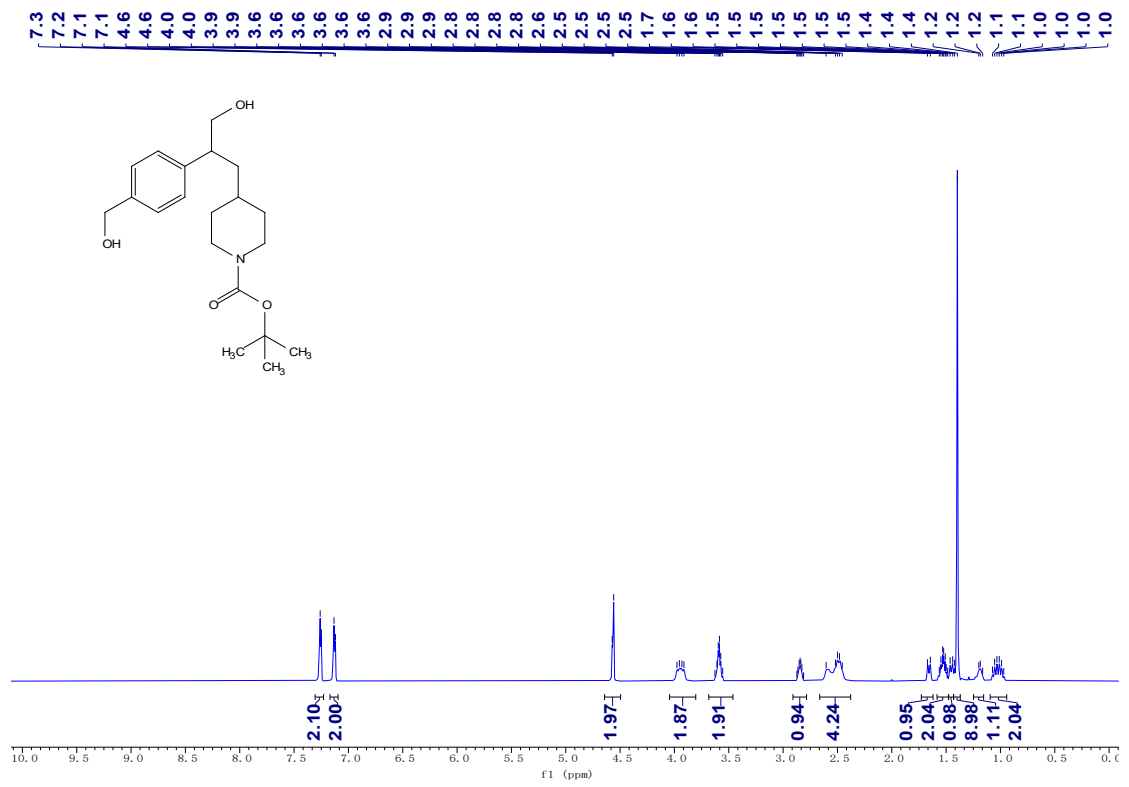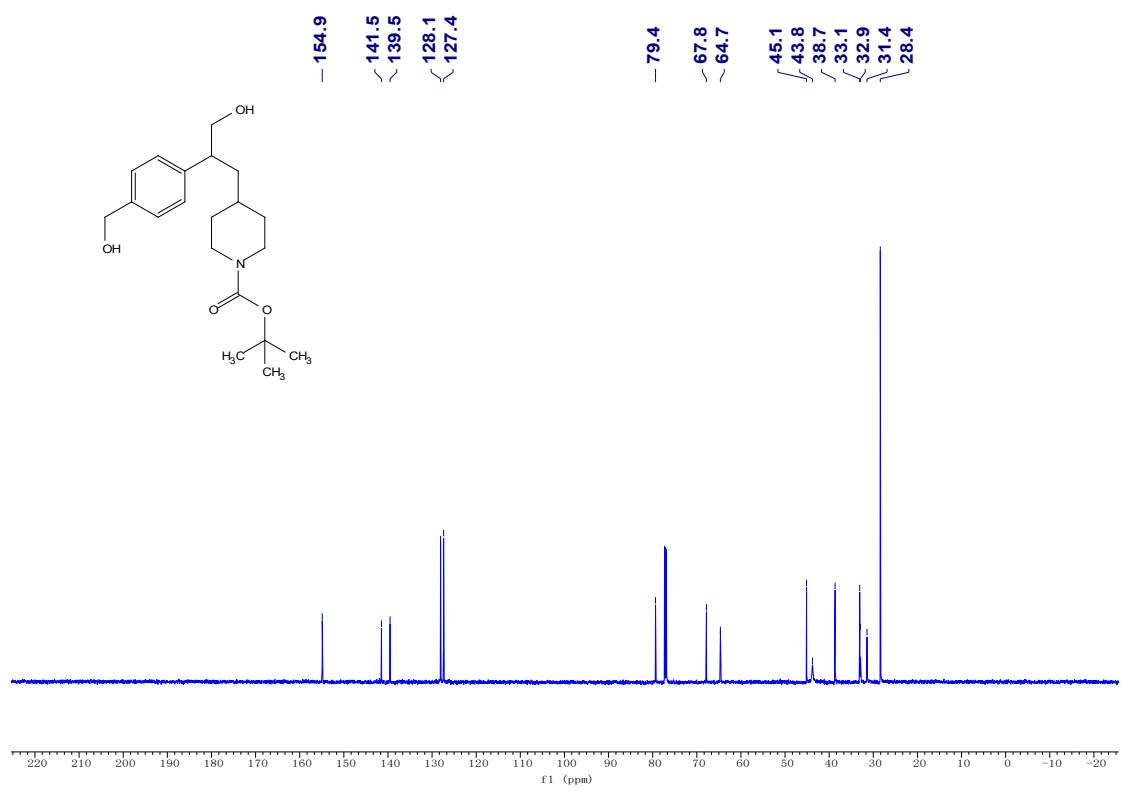

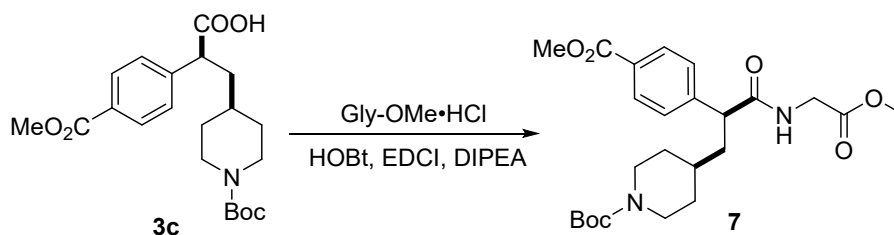

1-(3-Dimethylaminopropyl)-3-ethylcarbodiimide hydrochloride (EDCI: 46 mg, 0.24 mmol, 1.2 equiv) and 1-hydroxybenzotriazole (HOBt: 32.4 mg, 0.24 mmol, 1.2 equiv) S60 were added to solutions of **3c** (78.2 mg, 0.2 mmol, 1.0 equiv), glycine methyl ester hydrochloride (Gly-OMe·HCl: 30.1 mg, 0.24 mmol, 1.2 equiv), and *i*-Pr<sub>2</sub>NEt (38.8 mg, 0.5 mmol, 2.5 equiv) in CHCl<sub>3</sub> (2.0 mL) at 0 °C. The mixtures were stirred for 2 h at 0 °C and 10 h at room temperature. The organic layer is evaporated and purified by silica gel flash column chromatography (petroleum ether/EtOAc 5/1) to give the final product as an oil (79.5 mg, 0.172 mmol, 86%). <sup>1</sup>H NMR (600 MHz, Chloroform-*d*) δ 7.99 – 7.92 (m, 2H), 7.37 (d, *J* = 7.5 Hz, 2H), 6.47 (s, 1H), 4.05 – 3.95 (m, 3H), 3.91 – 3.82 (m, 4H), 3.69 – 3.63 (m, 3H), 3.62 (t, *J* = 7.7 Hz, 1H), 2.56 (d, *J* = 13.0 Hz, 2H), 2.15 – 1.98 (m, 1H), 1.81 – 1.55 (m, 3H), 1.40 – 1.39 (m, 9H), 1.33 – 1.27 (m, 1H), 1.13 – 0.98 (m, 2H). <sup>13</sup>C NMR (151 MHz, CHLOROFORM-*D*) δ 172.90, 170.09, 166.79, 154.79, 144.90, 130.00, 129.12, 127.90, 79.29, 52.18, 52.05, 49.60, 43.71, 41.23, 39.85, 33.47, 31.91, 27.92. **HRMS (ESI+)** [M+H]<sup>+</sup> calculated *m/z* for [C<sub>24</sub>H<sub>35</sub>N<sub>2</sub>O<sub>7</sub>]<sup>+</sup>: 463.2430, found:463.2422

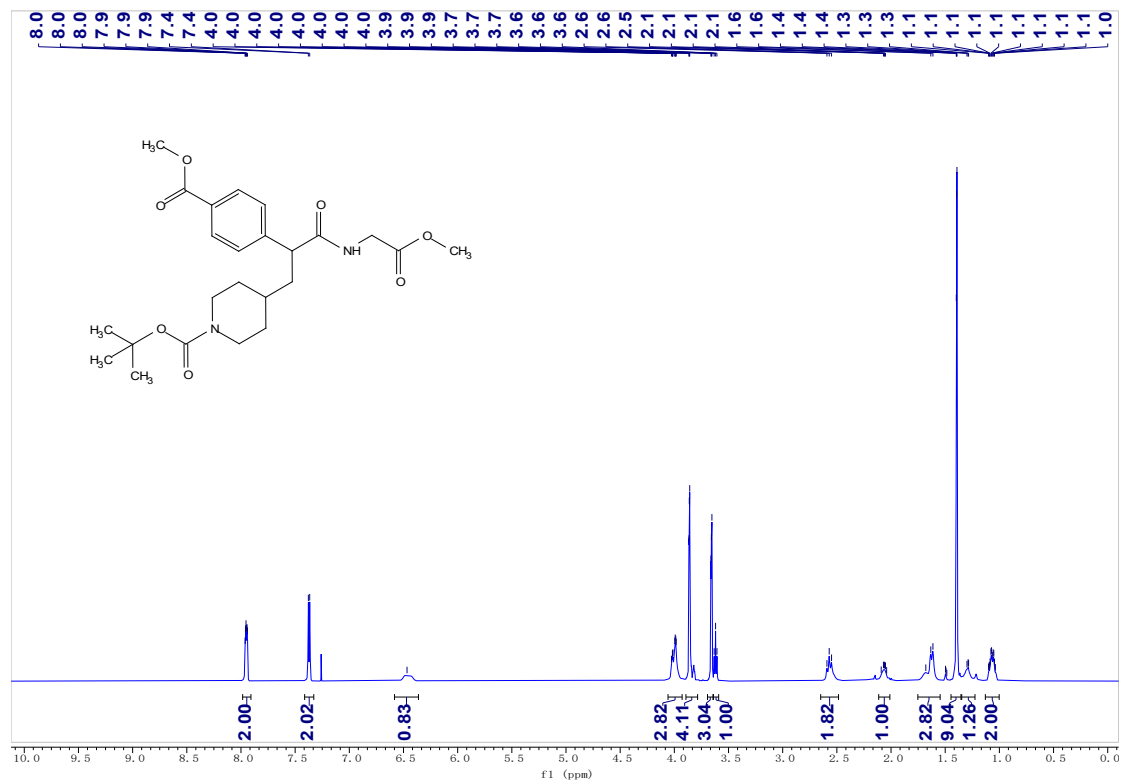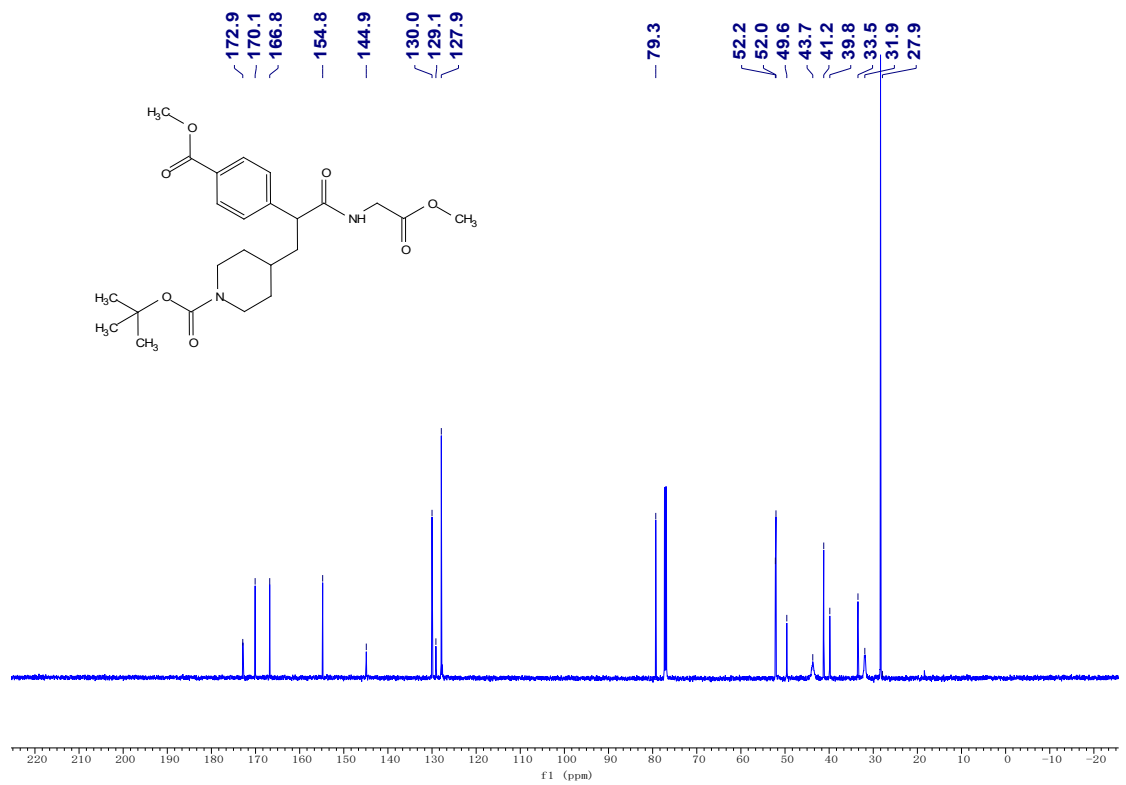

## 5. Synthesis and Characterization of Products

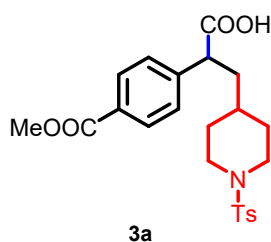

### 2-(4-(methoxycarbonyl)phenyl)-3-(1-tosylpiperidin-4-yl)propanoic acid

The general procedure A was followed. White Solid. Yield: 73 mg (82%)

**<sup>1</sup>H NMR (600 MHz, Chloroform-*d*)**  $\delta$  7.94 (d,  $J$  = 8.0 Hz, 1H), 7.58 (d,  $J$  = 7.6 Hz, 1H), 7.32 (d,  $J$  = 8.3 Hz, 1H), 7.28 (d,  $J$  = 8.1 Hz, 1H), 3.88 (s, 1H), 3.75 – 3.69 (m, 2H), 3.66 (t,  $J$  = 7.8 Hz, 1H), 2.40 (s, 2H), 2.12 – 2.03 (m, 2H), 1.97 (dt,  $J$  = 14.6, 7.5 Hz, 1H), 1.78 – 1.63 (m, 2H), 1.35 – 1.24 (m, 2H), 1.08 – 0.99 (m, 1H).

**<sup>13</sup>C NMR (151 MHz, Chloroform-*d*)**  $\delta$  178.5, 166.7, 143.5, 143.0, 132.9, 130.1, 129.6, 129.6, 128.1, 127.7, 52.3, 48.4, 46.2, 46.2, 39.0, 32.7, 31.5, 31.0, 21.5.

**HRMS (ESI+)**  $[M+Na]^+$  calculated  $m/z$  for  $[C_{23}H_{27}NNaO_6S]^+$ : 468.1451, found: 468.1449

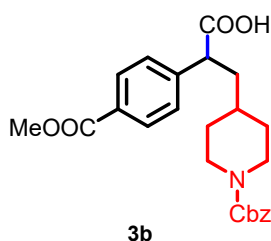

### 3-(1-((benzyloxy)carbonyl)piperidin-4-yl)-2-(4-(methoxycarbonyl)phenyl)propanoic acid

The general procedure A was followed. Colorless oil. Yield: 65 mg (76%)

**<sup>1</sup>H NMR (600 MHz, Chloroform-*d*)**  $\delta$  8.03 – 7.95 (m, 2H), 7.40 – 7.36 (m, 2H), 7.36 – 7.25 (m, 5H), 5.09 (s, 2H), 4.22 – 4.05 (m, 2H), 3.90 (s, 3H), 3.73 (t,  $J$  = 7.8 Hz, 1H), 2.77 – 2.54 (m, 2H), 2.10 – 1.91 (m, 1H), 1.77 – 1.58 (m, 3H), 1.40 – 1.25 (m, 1H), 1.21 – 1.02 (m, 2H).

**<sup>13</sup>C NMR (151 MHz, Chloroform-*d*)**  $\delta$  177.8, 166.8, 155.4, 143.5, 136.7, 130.1, 129.4, 128.5, 128.1, 128.0, 127.9, 67.2, 52.2, 48.5, 44.0, 43.9, 39.5, 33.5.

**HRMS (ESI+)** [M+Na]<sup>+</sup> calculated m/z for [C<sub>24</sub>H<sub>27</sub>NNaO<sub>6</sub>]<sup>+</sup>: 448.1731, found: 448.1723

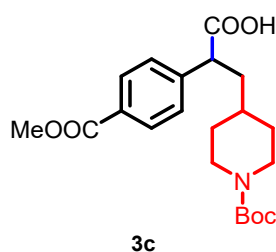

**3-(1-(tert-butoxycarbonyl)piperidin-4-yl)-2-(4-(methoxycarbonyl)phenyl)propanoic acid**

The general procedure A was followed. Colorless oil. Yield: 57 mg (73%)

**<sup>1</sup>H NMR (600 MHz, Chloroform-*d*)** δ 7.97 (d, *J* = 8.3 Hz, 2H), 7.37 (d, *J* = 8.4 Hz, 2H), δ 4.19 – 3.94 (m, 2H), 3.88 (s, 3H), 3.72 (t, *J* = 7.8 Hz, 1H), 2.69 – 2.46 (m, 1H), 2.07 – 1.96 (m, 1H), 1.71 (m, 1H), 1.66 – 1.56 (m, 2H), 1.41 (s, 9H), 1.34 – 1.25 (m, 1H), 1.13 – 1.03 (m, 2H).

**<sup>13</sup>C NMR (151 MHz, Chloroform-*d*)** δ 188.6, 178.0, 155.0, 143.7, 130.1, 129.4, 128.2, 79.7, 52.2, 48.6, 39.6, 33.7, 28.5.

**HRMS (ESI+)** [M+Na]<sup>+</sup> calculated m/z for [C<sub>23</sub>H<sub>25</sub>NNaO<sub>5</sub>]<sup>+</sup>: 414.1887, found: 414.1879

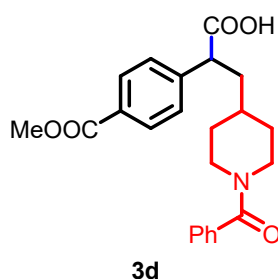

**3-(1-benzoylpiperidin-4-yl)-2-(4-(methoxycarbonyl)phenyl)propanoic acid**

The general procedure A was followed. White solid. Yield: 52 mg (65%)

**<sup>1</sup>H NMR (600 MHz, Chloroform-*d*)** δ 7.97 (d, *J* = 7.8 Hz, 2H), 7.40 – 7.31 (m, 7H), 4.65 (d, *J* = 12.8 Hz, 1H), 3.90 (s, 3H), 3.69 (t, *J* = 8.1 Hz, 2H), 2.88 (t, *J* = 13.1 Hz, 1H), 2.71 – 2.59 (m, 1H), 2.09 – 2.00 (m, 1H), 1.84 – 1.76 (m, 1H), 1.75 – 1.68 (m, 1H), 1.67 – 1.55 (m, 1H), 1.48 – 1.38 (m, 1H), 1.22 (s, 1H), 1.17 – 1.04 (m, 1H).

**<sup>13</sup>C NMR (151 MHz, Chloroform-*d*)**  $\delta$  176.9, 170.7, 166.9, 143.7, 135.7, 130.1, 129.7, 129.4, 128.5, 128.1, 126.9, 52.3, 48.6, 47.9, 42.4, 39.5, 33.9.

**HRMS (ESI+)** [M+Na]<sup>+</sup> calculated m/z for [C<sub>23</sub>H<sub>25</sub>NNaO<sub>5</sub>]<sup>+</sup>: 418.1625, found: 418.1620

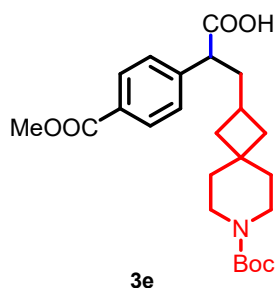

**3-(7-(tert-butoxycarbonyl)-7-azaspiro[3.5]nonan-2-yl)-2-(4-(methoxycarbonyl)phenyl)propanoic acid**

The general procedure A was followed. Colorless oil. Yield: 63 mg (72%)

**<sup>1</sup>H NMR (600 MHz, Chloroform-*d*)**  $\delta$  7.97 (d, *J* = 8.2 Hz, 2H), 7.35 (d, *J* = 8.1 Hz, 2H), 3.89 (s, 3H), 3.53 (t, *J* = 7.6 Hz, 1H), 3.24 (d, *J* = 38.6 Hz, 4H), 2.22 – 2.15 (m, 1H), 2.13 – 2.05 (m, 1H), 1.94 – 1.86 (m, 2H), 1.88 – 1.77 (m, 1H), 1.56 – 1.19 (m, 15H).

**<sup>13</sup>C NMR (151 MHz, Chloroform-*d*)**  $\delta$  178.4, 166.9, 155.1, 143.6, 130.0, 129.4, 128.2, 79.5, 52.2, 49.7, 41.0, 37.8, 37.6, 34.1, 26.9.

**HRMS (ESI+)** [M+Na]<sup>+</sup> calculated m/z for [C<sub>24</sub>H<sub>33</sub>NNaO<sub>6</sub>]<sup>+</sup>: 454.2200, found: 454.2192

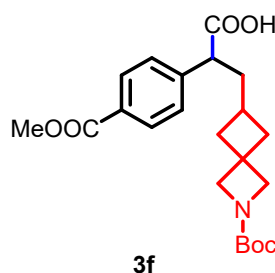

**3-(2-(tert-butoxycarbonyl)-2-azaspiro[3.3]heptan-6-yl)-2-(4-(methoxycarbonyl)phenyl)propanoic acid**

The general procedure A was followed. Colorless oil. Yield: 61 mg (75%)

**<sup>1</sup>H NMR (600 MHz, Chloroform-*d*)**  $\delta$  7.95 (d, *J* = 8.4 Hz, 2H), 7.33 (d, *J* = 8.3 Hz, 2H), 3.87 (s, 3H), 3.83 – 3.77 (m, 2H), 3.73 – 3.66 (m, 2H), 3.48 (t, *J* = 7.6 Hz, 1H), 2.22 – 2.15



(m, 1H), 2.15 – 2.04 (m, 2H), 2.01 – 1.92 (m, 1H), 1.85 – 1.72 (m, 2H), 1.67 – 1.59 (m, 1H), 1.37 (s, 9H).

**<sup>13</sup>C NMR (151 MHz, Chloroform-*d*)** δ 177.0, 166.9, 156.4, 143.8, 129.9, 129.2, 128.1, 79.7, 52.2, 49.7, 39.8, 38.9, 38.6, 34.1, 28.3, 27.8.

**HRMS (ESI+)** [M+Na]<sup>+</sup> calculated m/z for [C<sub>22</sub>H<sub>29</sub>NNaO<sub>6</sub>]<sup>+</sup>: 426.1887, found: 426.1880

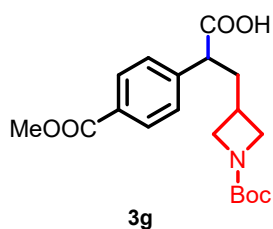

### **3-(1-(tert-butoxycarbonyl)azetidin-3-yl)-2-(4-(methoxycarbonyl)phenyl)propanoic acid**

The general procedure A was followed. Colorless oil. Yield: 52 mg (71%)

**<sup>1</sup>H NMR (600 MHz, Chloroform-*d*)** δ 7.98 (d, *J* = 8.0 Hz, 2H), 7.34 (d, *J* = 7.8 Hz, 2H), 3.94 (t, *J* = 8.2 Hz, 1H), 3.89 (s, 3H), 3.85 (t, *J* = 8.2 Hz, 1H), 3.56 (dd, *J* = 8.7, 6.0 Hz, 1H), 3.52 (t, *J* = 7.5 Hz, 1H), 3.43 (t, *J* = 7.2 Hz, 1H), 2.46 – 2.31 (m, 2H), 2.07 (d, *J* = 7.3 Hz, 1H), 1.38 (s, 9H).

**<sup>13</sup>C NMR (151 MHz, Chloroform-*d*)** δ 176.8, 166.8, 156.5, 143.0, 130.1, 129.6, 128.1, 79.9, 52.3, 49.5, 37.6, 28.4, 27.0.

**HRMS (ESI+)** [M+Na]<sup>+</sup> calculated m/z for [C<sub>19</sub>H<sub>25</sub>NNaO<sub>6</sub>]<sup>+</sup>: 386.1574, found: 386.1568

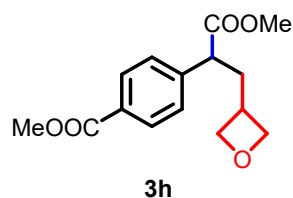

### **methyl 4-(1-methoxy-3-(oxetan-3-yl)-1-oxopropan-2-yl)benzoate**

The general procedure A was followed. Colorless oil. Yield: 26 mg (45%)

**<sup>1</sup>H NMR (600 MHz, Chloroform-*d*)** δ 7.96 (d, *J* = 8.4 Hz, 2H), 7.30 (d, *J* = 8.3 Hz, 2H), 4.72 – 4.63 (m, 1H), 4.59 – 4.50 (m, 1H), 4.40 – 4.31 (m, 1H), 4.24 – 4.14 (m, 1H), 3.87

(s, 3H), 3.63 (s, 3H), 3.49 (t,  $J = 7.7$  Hz, 1H), 2.95 – 2.81 (m, 1H), 2.54 – 2.36 (m, 1H), 2.26 – 2.08 (m, 1H).

**$^{13}\text{C}$  NMR (126 MHz, Chloroform-*d*)**  $\delta$  173.3, 166.7, 143.4, 130.2, 129.6, 128.0, 52.4, 52.2, 49.6, 37.3, 33.6.

**HRMS (ESI+)**  $[\text{M}+\text{H}]^+$  calculated  $m/z$  for  $[\text{C}_{15}\text{H}_{19}\text{O}_5]^+$ : 279.1227, found: 279.1224

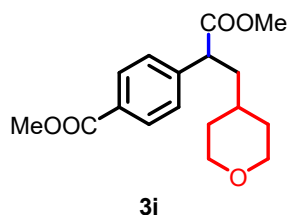

**methyl 4-(1-methoxy-1-oxo-3-(tetrahydro-2H-pyran-4-yl)propan-2-yl)benzoate**

The general procedure A was followed. Colorless oil. Yield: 34 mg (55%)

**$^1\text{H}$  NMR (600 MHz, Chloroform-*d*)**  $\delta$  7.95 (d,  $J = 8.3$  Hz, 2H), 7.34 (d,  $J = 8.4$  Hz, 2H), 3.85 (s, 5H), 3.72 (t,  $J = 7.8$  Hz, 1H), 3.61 (s, 3H), 3.29 – 3.18 (m, 2H), 2.09 – 1.92 (m, 1H), 1.74 – 1.65 (m, 1H), 1.54 (dd,  $J = 21.7, 12.9$  Hz, 2H), 1.39 – 1.29 (m, 1H), 1.29 – 1.20 (m, 2H).

**$^{13}\text{C}$  NMR (126 MHz, Chloroform-*d*)**  $\delta$  173.8, 166.7, 144.0, 129.9, 129.2, 127.9, 67.7, 67.6, 52.1, 52.0, 48.2, 40.2, 32.9, 32.6, 32.6.

**HRMS (ESI+)**  $[\text{M}+\text{H}]^+$  calculated  $m/z$  for  $[\text{C}_{17}\text{H}_{23}\text{O}_5]^+$ : 307.1540, found: 307.1540

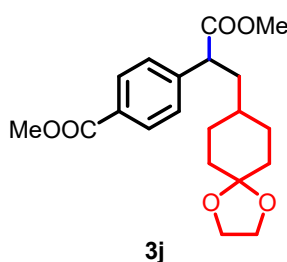

**methyl 4-(1-methoxy-1-oxo-3-(1,4-dioxaspiro[4.5]decan-8-yl)propan-2-yl)benzoate**

The general procedure A was followed. Colorless oil. Yield: 42 mg (58%)

**$^1\text{H}$  NMR (600 MHz, Chloroform-*d*)**  $\delta$  7.93 (d,  $J = 8.4$  Hz, 2H), 7.32 (d,  $J = 8.4$  Hz, 2H), 3.84 (d,  $J = 5.7$  Hz, 7H), 3.68 (t,  $J = 7.8$  Hz, 1H), 3.59 (s, 3H), 2.04 – 1.93 (m, 1H), 1.73 – 1.58 (m, 5H), 1.37 (t,  $J = 12.8$  Hz, 2H), 1.28 – 1.16 (m, 2H), 1.16 – 1.08 (m, 1H).

**<sup>13</sup>C NMR (126 MHz, Chloroform-*d*)**  $\delta$  173.8, 166.7, 144.3, 129.9, 129.1, 127.9, 108.7, 64.1, 52.1, 52.0, 49.1, 39.7, 34.2, 34.2, 33.9, 30.0, 29.7.

**HRMS (ESI+)** [M+H]<sup>+</sup> calculated m/z for [C<sub>20</sub>H<sub>27</sub>O<sub>6</sub>]<sup>+</sup>: 363.1802, found: 363.1801

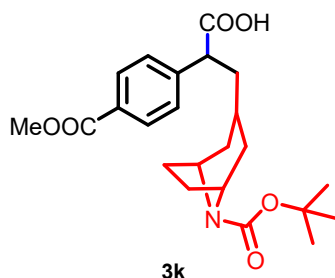

**3-(8-(tert-butoxycarbonyl)-8-azabicyclo[3.2.1]octan-3-yl)-2-(4-(methoxycarbonyl)phenyl)propanoic acid**

The general procedure A was followed. colorless oil. Yield: 72 mg (86%)

**<sup>1</sup>H NMR (600 MHz, Chloroform-*d*)**  $\delta$  7.98 (d, *J* = 8.3 Hz, 2H), 7.36 (d, *J* = 8.1 Hz, 2H), 4.17 (s, 1H), 4.08 (s, 1H), 3.89 (s, 3H), 3.67 (t, *J* = 7.6 Hz, 1H), 1.98 – 1.89 (m, 1H), 1.83 (s, 2H), 1.66 (s, 2H), 1.58 – 1.47 (m, 2H), 1.47 – 1.32 (m, 12H), 1.28 (s, 2H).

**<sup>13</sup>C NMR (151 MHz, Chloroform-*d*)**  $\delta$  177.6, 166.9, 153.5, 143.8, 130.1, 129.5, 128.1, 79.5, 53.4, 52.2, 48.6, 40.1, 37.7, 28.6, 27.6, 26.3.

**HRMS (ESI+)** [M+Na]<sup>+</sup> calculated m/z for [C<sub>23</sub>H<sub>31</sub>NNaO<sub>6</sub>]<sup>+</sup>: 440.2044, found: 440.2044

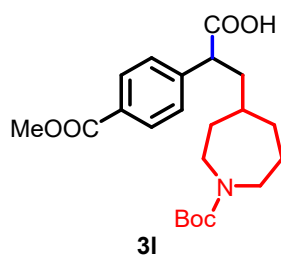

**3-(1-(tert-butoxycarbonyl)azepan-4-yl)-2-(4-(methoxycarbonyl)phenyl)propanoic acid**

The general procedure A was followed. Colorless oil. Yield: 52 mg (63%) dr = 1:1

**<sup>1</sup>H NMR (600 MHz, Chloroform-*d*)**  $\delta$  7.97 (d, *J* = 7.4 Hz, 2H), 7.37 (d, *J* = 7.5 Hz, 2H), 3.89 (s, 3H), 3.75 – 3.64 (m, 1H), 3.61 – 3.52 (m, 1H), 3.48 – 3.40 (m, 1H), 3.40 – 3.34

(m, 1H), 3.33 – 3.22 (m, 1H), 3.10 – 3.01 (m, 1H), 2.07 – 1.97 (m, 1H), 1.85 – 1.63 (m, 4H), 1.53 – 1.22 (m, 12H), 1.22 – 1.11 (m, 1H).

**<sup>13</sup>C NMR (151 MHz, Chloroform-*d*)** δ 178.2, 166.9, 155.7, 143.8, 143.8, 130.1, 129.4, 129.3, 128.2, 128.2, 79.4, 52.2, 49.2, 49.2, 46.8, 46.3, 46.31, 44.9, 44.6, 40.3, 40.2, 36.6, 36.4, 34.9, , 34.3, 32.9, 32.4, 28.5, 26.8, 26.7, 26.6.

**HRMS (ESI+)** [M+Na]<sup>+</sup> calculated m/z for [C<sub>22</sub>H<sub>31</sub>NNaO<sub>6</sub>]<sup>+</sup>: 428.2044, found: 440.2044

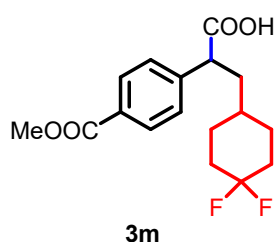

### **3-(4,4-difluorocyclohexyl)-2-(4-(methoxycarbonyl)phenyl)propanoic acid**

The general procedure A was followed. White solid. Yield: 36 mg (55%)

**<sup>1</sup>H NMR (600 MHz, Chloroform-*d*)** δ 7.99 (d, *J* = 8.3 Hz, 1H), 7.38 (d, *J* = 8.0 Hz, 1H), 3.89 (s, 3H), 3.73 (t, *J* = 7.8 Hz, 1H), 2.14 – 1.93 (m, 3H), 1.88 – 1.68 (m, 3H), 1.67 – 1.51 (m, 2H), 1.32 – 1.19 (m, 3H).

**<sup>13</sup>C NMR (151 MHz, Chloroform-*d*)** δ 179.1, 166.8, 143.3, 130.1, 129.5, 128.1, 123.4 (t, *J* = 241.2, 239.0 Hz), 52.2, 49.0, 38.7, 33.39 (d, *J* = 10.1 Hz), 33.3 (d, *J* = 4.3 Hz), 33.1 (d, *J* = 5.8 Hz), 33.0, 28.9 (d, *J* = 9.3 Hz), 28.5 (d, *J* = 9.4 Hz). **<sup>19</sup>F NMR (565 MHz, CHLOROFORM-*D*)** δ -91.7 (d, *J* = 235.3 Hz), -102.0 (d, *J* = 235.3 Hz).

**HRMS (ESI+)** [M+Na]<sup>+</sup> calculated m/z for [C<sub>17</sub>H<sub>20</sub>F<sub>2</sub>NaO<sub>4</sub>]<sup>+</sup>: 349.1222, found: 349.1223

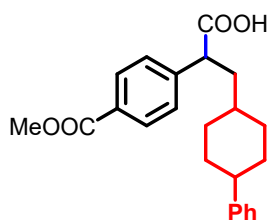

### **2-(4-(methoxycarbonyl)phenyl)-3-(4-phenylcyclohexyl)propanoic acid**

The general procedure A was followed. White solid. Yield: 50 mg (68%), dr = 1.8:1

**<sup>1</sup>H NMR (600 MHz, Chloroform-*d*)** δ 8.03 (dd, *J* = 8.3, 1.6 Hz, 1H), 7.44 (dd, *J* = 8.3, 5.1 Hz, 1H), 7.34 – 7.23 (m, 1H), 7.26 – 7.13 (m, 2H), 3.92 (d, *J* = 1.5 Hz, 1H), 3.82 (t, *J* = 7.8

Hz, 0.35H), 3.73 (t,  $J = 7.8$  Hz, 0.62H),  $\delta$  2.63 – 2.51 (m, 0.59H), 2.50 – 2.40 (m, 0.34H), 2.34 – 2.20 (m, 0.61H), 2.16 – 1.99 (m, 0.41H), 2.00 – 1.85 (m, 2H), 1.85 – 1.75 (m, 0.39H), 1.76 – 1.56 (m, 5.7H), 1.47 – 1.34 (m, 0.75H), 1.33 – 1.19 (m, 0.51H), 1.17 – 1.06 (m, 0.71H).

**$^{13}\text{C}$  NMR (151 MHz, Chloroform-*d*)**  $\delta$  179.5, 166.9, 147.4, 147.0, 143.8, 143.7, 130.1, 129.5, 129.4, 128.4, 128.3, 126.9, 126.8, 126.0, 125.9, 52.2, 49.6, 48.9, 44.4, 43.4, 40.5, 35.2, 34.9, 34.0, 33.9, 33.5, 33.1, 30.5, 30.1, 29.6, 28.8, 28.6.

**HRMS (ESI-)**  $[\text{M}-\text{H}]^-$  calculated  $m/z$  for  $[\text{C}_{23}\text{H}_{25}\text{O}_4]^-$ : 365.1758, found: 356.1761

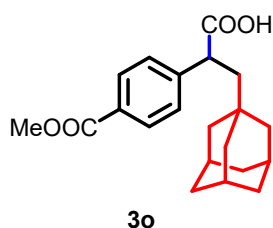

### **3-(adamantan-1-yl)-2-(4-(methoxycarbonyl)phenyl)propanoic**

The general procedure A was followed. White solid. Yield: 43 mg (62%)

**$^1\text{H}$  NMR (600 MHz, Chloroform-*d*)**  $\delta$  7.96 (d,  $J = 8.3$  Hz, 1H), 7.39 (d,  $J = 8.3$  Hz, 1H), 3.89 (s, 1H), 3.77 (dd,  $J = 8.3, 4.5$  Hz, 1H), 2.13 (dd,  $J = 14.2, 8.3$  Hz, 1H), 1.91 (s, 2H), 1.66 (d,  $J = 12.2$  Hz, 4H), 1.58 (d,  $J = 11.5$  Hz, 2H), 1.48 (d,  $J = 14.2$  Hz, 2H), 1.41 (d,  $J = 11.9$  Hz, 2H).

**$^{13}\text{C}$  NMR (151 MHz, Chloroform-*d*)**  $\delta$  180.2, 166.9, 145.6, 130.0, 129.1, 128.1, 128.1, 52.2, 47.5, 46.3, 42.34, 36.9, 28.6, 28.6.

**HRMS (ESI-)**  $[\text{M}-\text{H}]^-$  calculated  $m/z$  for  $[\text{C}_{21}\text{H}_{25}\text{O}_4]^-$ : 341.1758, found: 341.1760

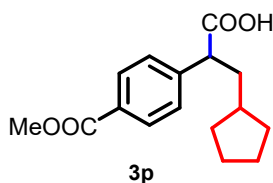

### **3-cyclopentyl-2-(4-(methoxycarbonyl)phenyl)propanoic acid**

The general procedure A was followed. White solid. Yield: 25 mg (44%)

**<sup>1</sup>H NMR (600 MHz, Chloroform-*d*)**  $\delta$  8.03 – 7.95 (m, 2H), 7.42 – 7.34 (m, 2H), 7.39 – 7.25 (m, 5H), 5.09 (s, 1H), 4.22 – 4.05 (m, 1H), 3.90 (s, 1H), 2.77 – 2.54 (m, 1H), 2.10 – 1.91 (m, 1H), 1.77 – 1.58 (m, 2H), 1.40 – 1.25 (m, 1H), 1.21 – 1.02 (m, 1H).

**<sup>13</sup>C NMR (151 MHz, Chloroform-*d*)**  $\delta$  179.5, 166.9, 143.8, 130.0, 129.4, 128.3, 52.2, 50.8, 39.5, 37.8, 32.7, 32.3, 25.1, 25.1.

**HRMS (ESI-)** [M-H]<sup>-</sup> calculated m/z for [C<sub>26</sub>H<sub>19</sub>O<sub>4</sub>]<sup>-</sup>: 275.1289, found: 275.1292

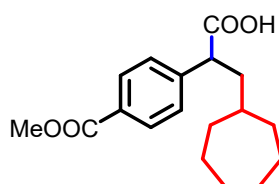

**3q**

### **3-cycloheptyl-2-(4-(methoxycarbonyl)phenyl)propanoic acid**

The general procedure A was followed. White solid. Yield: 31 mg (51%)

**<sup>1</sup>H NMR (600 MHz, Chloroform-*d*)**  $\delta$  7.99 (d, *J* = 8.3 Hz, 1H), 7.39 (d, *J* = 8.3 Hz, 3H), 3.90 (s, 1H), 3.72 (t, *J* = 7.8 Hz, 0H), 2.04 – 1.96 (m, 1H), 1.76 – 1.63 (m, 1H), 1.63 – 1.54 (m, 1H), 1.54 – 1.39 (m, 1H), 1.38 – 1.29 (m, 1H), 1.24 – 1.13 (m, 1H).

**<sup>13</sup>C NMR (151 MHz, Chloroform-*d*)**  $\delta$  179.8, 166.9, 143.9, 130.0, 129.3, 128.3, 52.2, 49.4, 41.0, 36.5, 34.6, 33.9, 28.6, 28.5, 26.1, 26.0.

**HRMS (ESI+)** [M+Na]<sup>+</sup> calculated m/z for [C<sub>18</sub>H<sub>24</sub>NaO<sub>4</sub>]<sup>+</sup>: 327.1567, found: 327.1566

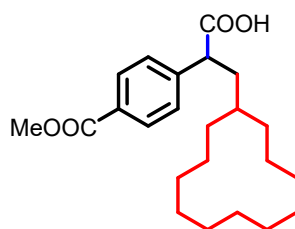

**3r**

### **3-cyclododecyl-2-(4-(methoxycarbonyl)phenyl)propanoic acid**

The general procedure A was followed. White solid. Yield: 51 mg (67%)

**<sup>1</sup>H NMR (600 MHz, Chloroform-*d*)**  $\delta$  7.99 (d, *J* = 8.2 Hz, 1H), 7.39 (d, *J* = 8.2 Hz, 1H), 3.73 (t, *J* = 7.8 Hz, 1H), 2.00 – 1.91 (m, 1H), 1.77 – 1.68 (m, 1H), 1.41 – 1.11 (m, 12H).

**<sup>13</sup>C NMR (151 MHz, Chloroform-*d*)**  $\delta$  179.8, 166.9, 143.9, 130.0, 129.3, 128.3, 52.2, 49.4, 38.2, 31.6, 28.9, 28.8, 24.8, 24.6, 24.1, 23.5, 23.3, 23.1, 22.9, 21.5, 21.3.

**HRMS (ESI+)** [M+Na]<sup>+</sup> calculated m/z for [C<sub>23</sub>H<sub>34</sub>NaO<sub>4</sub>]<sup>+</sup>: 397.2349, found: 397.2349

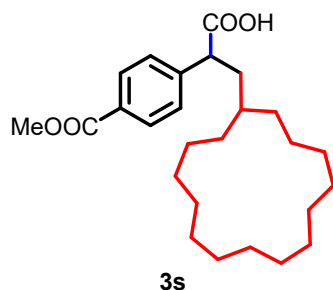

### **3-cyclopentadecyl-2-(4-(methoxycarbonyl)phenyl)propanoic acid**

The general procedure A was followed. White solid. Yield: 58 mg (69%)

**<sup>1</sup>H NMR (600 MHz, Chloroform-*d*)**  $\delta$  7.99 (d, *J* = 8.3 Hz, 2H), 7.39 (d, *J* = 8.4 Hz, 2H), 3.90 (s, 3H), 3.72 (t, *J* = 7.7 Hz, 1H), 2.09 – 1.89 (m, 1H), 1.85 – 1.67 (m, 1H), 1.33 – 1.20 (m, 29H).

**<sup>13</sup>C NMR (126 MHz, Chloroform-*d*)**  $\delta$  179.7, 166.9, 143.9, 130.0, 129.3, 128.4, 52.2, 49.4, 38.4, 34.0, 32.3, 32.0, 27.6, 27.0, 26.9, 26.8, 26.7, 26.7, 26.6, 26.4, 24.3, 24.2.

**HRMS (ESI+)** [M+Na]<sup>+</sup> calculated m/z for [C<sub>26</sub>H<sub>40</sub>NaO<sub>4</sub>]<sup>+</sup>: 439.2819, found: 439.2821

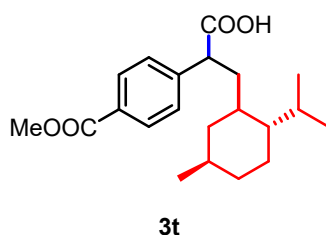

### **3-((2S,5R)-2-isopropyl-5-methylcyclohexyl)-2-(4-(methoxycarbonyl)phenyl)propanoic acid**

The general procedure A was followed. Colorless oil. Yield: 33 mg (47%)

**<sup>1</sup>H NMR (600 MHz, Chloroform-*d*)**  $\delta$  8.03 – 7.94 (m, 2H), 7.43 (t, *J* = 8.7 Hz, 2H), 3.90 (s, 3H), 3.81 (dd, *J* = 11.2, 4.0 Hz, 0.6H), 3.72 (dd, *J* = 11.0, 4.3 Hz, 0.29H), 2.56 – 2.47 (m, 0.6H), 2.11 – 2.01 (m, 0.95H), 2.01 – 1.95 (m, 0.33H), 1.92 – 1.86 (m, 0.61H), 1.77 – 1.57 (m, 3H), 1.48 – 1.36 (m, 0.68H), 1.34 – 1.26 (m, 1.69H), 1.24 – 1.17 (m, 0.74H),

1.04 – 0.91 (m, 1.74H), 0.91 – 0.84 (m, 6.83H), 0.81 (d,  $J = 6.5$  Hz, 1.72H), 0.74 (d,  $J = 6.9$  Hz, 1.92H), 0.59 (q,  $J = 12.0$  Hz, 0.61H).

**$^{13}\text{C}$  NMR (151 MHz, Chloroform-*d*)**  $\delta$  179.2, 166.9, 144.8, 144.7, 130.1, 129.4, 129.3, 128.1, 128.0, 52.2, 49.4, 48.9, 48.4, 47.6, 41.4, 38.2, 37.7, 37.4, 35.8, 35.2, 33.3, 32.6, 30.0, 29.2, 26.5, 26.0, 24.9, 24.3, 22.8, 21.7, 21.7, 20.7, 15.2.

**HRMS (ESI+)**  $[\text{M}+\text{Na}]^+$  calculated  $m/z$  for  $[\text{C}_{21}\text{H}_{30}\text{NaO}_4]^+$ : 369.2036, found: 369.2036

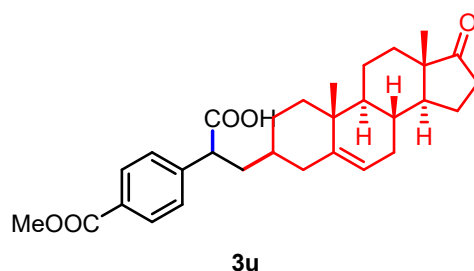

**3-((8R,9S,10R,13S,14S)-10,13-dimethyl-17-oxo-2,3,4,7,8,9,10,11,12,13,14,15,16,17-tetradecahydro-1H-cyclopenta[a]phenanthren-3-yl)-2-(4-(methoxycarbonyl)phenyl)propanoic acid**

The general procedure A was followed. White solid. Yield: 51 mg (53%). dr = 4:1

**$^1\text{H}$  NMR (600 MHz, Chloroform-*d*)**  $\delta$  7.98 (d,  $J = 8.0$  Hz, 2H), 7.41 – 7.36 (m, 2H), 5.31 (d,  $J = 5.1$  Hz, 0.73H), 5.24 (d,  $J = 5.1$  Hz, 0.18H), 3.90 (s, 3H), 3.62 (t,  $J = 7.7$  Hz, 1H), 2.50 – 2.39 (m, 2H), 2.13 – 1.98 (m, 3H), 1.96 – 1.89 (m, 1H), 1.88 – 1.76 (m, 2H), 1.76 – 1.60 (m, 6H), 1.59 – 1.37 (m, 4H), 1.30 – 1.11 (m, 3H), 1.08 – 1.01 (m, 1H), 1.00 (s, 3H), 0.86 (s, 3H).

**$^{13}\text{C}$  NMR (126 MHz, Chloroform-*d*)**  $\delta$  221.6, 179.2, 166.9, 143.7, 140.1, 130.0, 129.5, 128.3, 121.1, 52.2, 51.9, 50.5, 49.2, 47.6, 37.6, 36.5, 35.9, 34.1, 34.0, 31.5, 30.8, 26.0, 21.9, 20.1, 19.5, 13.6.

**HRMS (ESI+)**  $[\text{M}+\text{Na}]^+$  calculated  $m/z$  for  $[\text{C}_{30}\text{H}_{38}\text{NaO}_5]^+$ : 501.2611, found: 501.2614



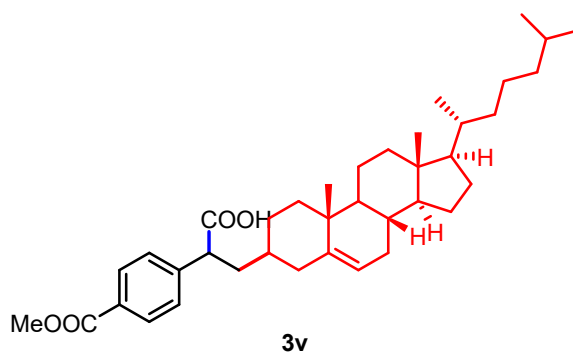

**3-((8S,10R,13R,14S,17R)-10,13-dimethyl-17-((R)-6-methylheptan-2-yl)-2,3,4,7,8,9,10,11,12,13,14,15,16,17-tetradecahydro-1H-cyclopenta[a]phenanthren-3-yl)-2-(4-(methoxycarbonyl)phenyl)propanoic acid**

The general procedure A was followed. White solid. Yield: 53 mg (46%). dr = 4.8:1

**<sup>1</sup>H NMR (600 MHz, Chloroform-*d*)** δ 7.99 (d, *J* = 7.7 Hz, 2H), 7.39 (t, *J* = 7.7 Hz, 2H), 5.31 – 5.20 (m, 1H), 3.90 (s, 3H), 3.77 (t, *J* = 7.7 Hz, 0.15H), 3.63 (td, *J* = 7.8, 3.1 Hz, 0.72H), 2.43 (d, *J* = 13.4 Hz, 1H), 2.11 – 1.97 (m, 2H), 1.93 (d, *J* = 14.8 Hz, 1H), 1.87 – 1.60 (m, 5H), 1.59 – 1.49 (m, 4H), 1.49 – 1.30 (m, 7H), 1.29 – 1.19 (m, 2H), 1.19 – 1.01 (m, 7H), 1.00 – 0.95 (m, 5H), 0.94 (s, 1H), 0.91 (d, *J* = 6.5 Hz, 3H), 0.87 (dd, *J* = 6.7, 2.7 Hz, 6H), 0.66 (s, 3H).

**<sup>13</sup>C NMR (126 MHz, Chloroform-*d*)** δ 179.7, 179.5, 166.9, 143.9, 143.8, 142.4, 139.9, 139.8, 130.0, 130.0, 129.3, 129.3, 128.4, 128.3, 128.2, 121.9, 121.8, 120.0, 56.8, 56.2, 52.2, 50.4, 49.4, 49.2, 42.3, 39.8, 39.6, 37.4, 37.4, 37.2, 36.7, 36.4, 36.3, 35.9, 34.3, 34.1, 34.0, 33.9, 31.9, 31.6, 28.30, 28.1, 26.1, 25.9, 24.3, 23.9, 22.9, 22.6, 20.8, 19.4, 18.8, 11.9.

**HRMS (ESI+)** [M+Na]<sup>+</sup> calculated m/z for [C<sub>38</sub>H<sub>56</sub>NaO<sub>4</sub>]<sup>+</sup>: 599.4071, found: 599.4078

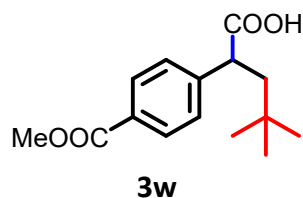

**2-(4-(methoxycarbonyl)phenyl)-4,4-dimethylpentanoic acid**

The general procedure A was followed. Colorless oil. Yield: 25mg (47%)

**<sup>1</sup>H NMR (600 MHz, Chloroform-*d*)** δ 7.99 (d, *J* = 8.3 Hz, 2H), 7.39 (d, *J* = 8.4 Hz, 2H), 3.90 (s, 3H), 3.56 (t, *J* = 7.7 Hz, 1H), 2.13 – 2.04 (m, 1H), 1.83 – 1.74 (m, 1H), 1.57 – 1.48 (m, 1H), 1.23 – 1.14 (m, 1H), 1.11 – 1.02 (m, 1H), 0.85 (t, *J* = 7.0 Hz, 6H).

**<sup>13</sup>C NMR (151 MHz, Chloroform-*d*)** δ 179.15, 166.96, 143.79, 130.04, 129.43, 128.26, 52.21, 51.86, 36.57, 31.04, 27.92, 22.51, 22.38.

**HRMS (ESI-)** [M-H]<sup>+</sup> calculated m/z for [C<sub>15</sub>H<sub>19</sub>O<sub>4</sub>]<sup>-</sup>: 263.1289, found:263.1283

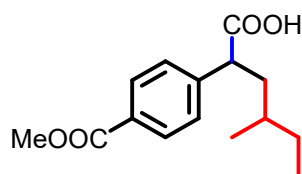

**3x**

#### **2-(4-(methoxycarbonyl)phenyl)-4-methylhexanoic acid**

The general procedure A was followed. Colorless oil. Yield: 24mg (45%)

**<sup>1</sup>H NMR (600 MHz, Chloroform-*d*)** δ 7.99 (dd, *J* = 8.3, 2.7 Hz, 2H), 7.40 (t, *J* = 8.3 Hz, 2H), 3.90 (s, 3H), 3.77 – 3.71 (m, 1H), 2.17 – 2.09 (m, 0.5H), 1.93 – 1.80 (m, 1H), 1.57 – 1.50 (m, 0.5H), 1.45 – 1.28 (m, 2H), 1.22 – 1.11 (m, 1.5H), 0.91 – 0.83 (m, 4.5H), 0.81 (t, *J* = 7.2 Hz, 1.5H).

**<sup>13</sup>C NMR (151 MHz, Chloroform-*d*)** δ 179.37, 179.16, 166.95, 144.15, 143.66, 130.05, 129.41, 129.38, 128.38, 128.20, 52.21, 49.39, 49.31, 40.24, 39.61, 32.29, 31.87, 29.52, 29.16, 19.07, 18.69, 11.10, 11.01.

**HRMS (ESI-)** [M-H]<sup>+</sup> calculated m/z for [C<sub>15</sub>H<sub>19</sub>O<sub>4</sub>]<sup>-</sup>: 263.1289, found:263.1287

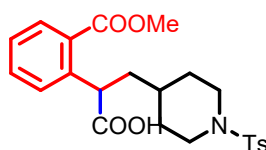

**4a**

#### **2-(2-(methoxycarbonyl)phenyl)-3-(1-tosylpiperidin-4-yl)propanoic acid**

The general procedure A was followed. White Solid. Yield: 65 mg (73%)

**<sup>1</sup>H NMR (600 MHz, Chloroform-*d*)**  $\delta$  7.84 (d, *J* = 7.8 Hz, 1H), 7.58 (d, *J* = 7.9 Hz, 2H), 7.44 (t, *J* = 7.5 Hz, 1H), 7.37 (d, *J* = 7.8 Hz, 1H), 7.28 (t, *J* = 6.7 Hz, 3H), 4.66 (t, *J* = 7.4 Hz, 1H), 3.87 (s, 3H), 3.69 (d, *J* = 10.7 Hz, 2H), 2.39 (s, 3H), 2.19 – 1.99 (m, 3H), 1.71 (d, *J* = 13.2 Hz, 2H), 1.67 – 1.59 (m, 1H), 1.35 – 1.21 (m, 2H), 1.21 – 1.08 (m, 1H).

**<sup>13</sup>C NMR (126 MHz, Chloroform-*d*)**  $\delta$  178.1, 168.4, 143.4, 139.5, 132.9, 132.5, 130.8, 129.5, 129.4, 128.4, 127.6, 127.3, 52.5, 46.2, 43.7, 38.8, 33.0, 31.3, 31.3, 21.4.

**HRMS (ESI+)** [M+Na]<sup>+</sup> calculated *m/z* for [C<sub>23</sub>H<sub>27</sub>NNaO<sub>6</sub>S]<sup>+</sup>: 468.1451, found: 468.1449

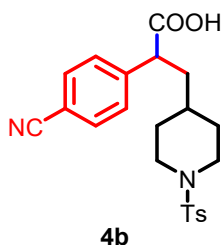

#### **2-(4-cyanophenyl)-3-(1-tosylpiperidin-4-yl)propanoic acid**

The general procedure A was followed. White Solid. Yield: 65 mg (78%)

**<sup>1</sup>H NMR (500 MHz, Chloroform-*d*)**  $\delta$  7.59 (d, *J* = 8.2 Hz, 4H), 7.37 (d, *J* = 8.3 Hz, 2H), 7.29 (d, *J* = 8.0 Hz, 2H), 3.74 (d, *J* = 9.9 Hz, 2H), 3.67 (t, *J* = 7.8 Hz, 1H), 2.41 (s, 3H), 2.15 – 2.05 (m, 2H), 2.03 – 1.95 (m, 1H), 1.75 – 1.65 (m, 3H), 1.36 – 1.27 (m, 2H), 1.10 – 1.00 (m, 1H).

**<sup>13</sup>C NMR (151 MHz, Chloroform-*d*)**  $\delta$  177.9, 143.7, 143.2, 133.0, 132.7, 129.7, 128.9, 127.8, 118.4, 111.8, 48.4, 46.2, 46.1, 39.1, 32.8, 31.5, 31.1, 21.6.

**HRMS (ESI+)** [M+Na]<sup>+</sup> calculated *m/z* for [C<sub>22</sub>H<sub>24</sub>N<sub>2</sub>NaO<sub>4</sub>S]<sup>+</sup>: 435.1349, found: 435.1348

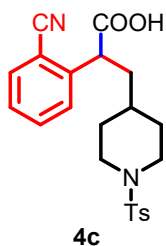

#### **2-(2-cyanophenyl)-3-(1-tosylpiperidin-4-yl)propanoic acid**

The general procedure A was followed. White Solid. Yield: 61 mg (74%)

**<sup>1</sup>H NMR (600 MHz, Chloroform-*d*)**  $\delta$  7.62 – 7.53 (m, 4H), 7.45 (d, *J* = 7.9 Hz, 1H), 7.36 (t, *J* = 7.6 Hz, 1H), 7.28 (d, *J* = 8.0 Hz, 2H), 4.10 (t, *J* = 7.5 Hz, 1H), 3.72 (t, 2H), 2.39 (s, 3H), 2.13 (t, *J* = 11.9 Hz, 2H), 2.08 – 2.00 (m, 1H), 1.80 (d, *J* = 13.1 Hz, 1H), 1.75 – 1.64 (m, 2H), 1.37 – 1.26 (m, 2H), 1.13 – 1.02 (m, 1H).

**<sup>13</sup>C NMR (151 MHz, Chloroform-*d*)**  $\delta$  177.3, 143.5, 141.8, 133.4, 133.1, 129.6, 128.1, 127.9, 127.6, 117.4, 112.9, 46.2, 46.1, 39.3, 32.9, 31.3, 31.1, 21.5.

**HRMS (ESI+)** [M+Na]<sup>+</sup> calculated m/z for [C<sub>22</sub>H<sub>24</sub>N<sub>2</sub>NaO<sub>4</sub>S]<sup>+</sup>: 435.1349, found: 435.1349

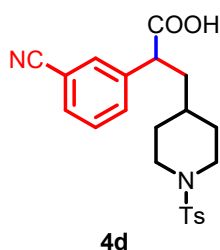

### 2-(3-cyanophenyl)-3-(1-tosylpiperidin-4-yl)propanoic acid

The general procedure A was followed. White Solid. Yield: 54 mg (65%)

**<sup>1</sup>H NMR (600 MHz, Chloroform-*d*)**  $\delta$  7.59 (d, *J* = 8.0 Hz, 2H), 7.55 (d, *J* = 9.3 Hz, 2H), 7.50 (d, *J* = 8.1 Hz, 1H), 7.41 (t, *J* = 7.7 Hz, 1H), 7.29 (d, *J* = 8.0 Hz, 2H), 3.73 (d, *J* = 9.8 Hz, 2H), 3.64 (t, *J* = 7.8 Hz, 1H), 2.41 (s, 3H), 2.16 – 2.06 (m, 2H), 2.03 – 1.96 (m, 1H), 1.74 – 1.65 (m, 3H), 1.36 – 1.27 (m, 2H), 1.11 – 1.00 (m, 1H).

**<sup>13</sup>C NMR (151 MHz, Chloroform-*d*)**  $\delta$  177.9, 143.6, 139.5, 133.0, 132.7, 131.6, 131.4, 129.7, 129.7, 127.7, 118.4, 113.0, 48.0, 46.2, 46.1, 39.2, 32.8, 31.4, 31.1, 21.6.

**HRMS (ESI+)** [M+Na]<sup>+</sup> calculated m/z for [C<sub>22</sub>H<sub>24</sub>N<sub>2</sub>NaO<sub>4</sub>S]<sup>+</sup>: 435.1349, found: 435.1346

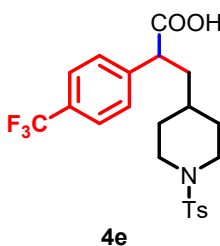

### 3-(1-tosylpiperidin-4-yl)-2-(4-(trifluoromethyl)phenyl)propanoic acid

The general procedure A was followed. Colorless oil. Yield: 61 mg (67%)

**<sup>1</sup>H NMR (600 MHz, Chloroform-*d*)**  $\delta$  7.59 (d,  $J = 8.2$  Hz, 1H), 7.54 (d,  $J = 8.1$  Hz, 1H), 7.38 (d,  $J = 8.1$  Hz, 1H), 7.28 (d,  $J = 8.1$  Hz, 1H), 3.75 – 3.70 (m, 1H), 3.67 (t,  $J = 7.8$  Hz, 1H), 2.40 (s, 2H), 2.17 – 2.05 (m, 1H), 1.98 (dt,  $J = 13.9, 7.6$  Hz, 1H), 1.75 – 1.67 (m, 1H), 1.37 – 1.26 (m, 1H), 1.07 (m, 1H). **<sup>13</sup>C NMR (151 MHz, Chloroform-*d*)**  $\delta$  178.4, 143.6, 142.0, 132.9, 130.0 (q,  $J = 32.7$  Hz), 129.7, 128.5, 127.7, 125.8 (d,  $J = 4.1$  Hz), 124.0 (q,  $J = 272.2$  Hz), 48.3, 46.2, 46.1, 39.1, 32.7, 31.4, 31.0, 21.5.

**<sup>19</sup>F NMR (565 MHz, Chloroform-*d*)**  $\delta$  -62.5.

**HRMS (ESI+)**  $[M+Na]^+$  calculated  $m/z$  for  $[C_{22}H_{24}F_3NNaO_4S]^+$ : 478.1270, found: 478.1269

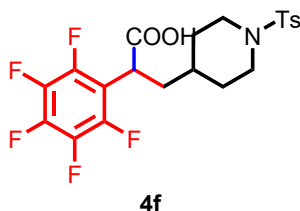

#### **2-(perfluorophenyl)-3-(1-tosylpiperidin-4-yl)propanoic acid**

The general procedure A was followed. White Solid. Yield: 69 mg (72%)

**<sup>1</sup>H NMR (500 MHz, Chloroform-*d*)**  $\delta$  7.58 (d,  $J = 8.3$  Hz, 2H), 7.28 (d,  $J = 8.0$  Hz, 2H), 4.02 (dd,  $J = 9.6, 5.8$  Hz, 1H), 3.78 – 3.67 (m, 2H), 2.39 (s, 3H), 2.16 – 2.04 (m, 3H), 1.82 – 1.70 (m, 2H), 1.62 (d,  $J = 10.5$  Hz, 1H), 1.39 – 1.22 (m, 2H), 1.06 – 0.93 (m, 1H).

**<sup>13</sup>C NMR (151 MHz, Chloroform-*d*)**  $\delta$  176.3, 146.0-144.3 (m, 2C), 143.6, 141.6-139.8 (m, 1C), 138.6-136.7 (m, 2C), 133.0, 129.7, 127.7, 112.2 (t,  $J = 17.9$  Hz), 46.2, 46.1, 37.5, 36.3, 33.0, 31.7, 30.6, 21.5.

**<sup>19</sup>F NMR (565 MHz, Chloroform-*d*)**  $\delta$  -141.4 (dd,  $J = 21.7, 6.5$  Hz), -154.2 (t,  $J = 21.0$  Hz), -161.1 (td,  $J = 21.3, 6.6$  Hz).

**HRMS (ESI+)**  $[M+Na]^+$  calculated  $m/z$  for  $[C_{21}H_{20}F_5NNaO_4S]^+$ : 500.0925, found: 500.0922

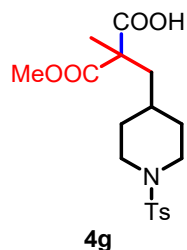

### 3-methoxy-2-methyl-3-oxo-2-((1-tosylpiperidin-4-yl)methyl)propanoic acid

The general procedure A was followed. White Solid. Yield: 60 mg (77%)

**<sup>1</sup>H NMR (600 MHz, Chloroform-*d*)**  $\delta$  7.60 (d,  $J$  = 7.9 Hz, 2H), 7.31 (d,  $J$  = 8.1 Hz, 2H), 3.70 (s, 3H), 3.68 (d,  $J$  = 11.7 Hz, 2H), 2.42 (s, 3H), 2.20 – 2.13 (m, 2H), 1.91 – 1.78 (m, 2H), 1.63 (d,  $J$  = 12.7 Hz, 2H), 1.40 (s, 3H), 1.38 – 1.31 (m, 2H), 1.31 – 1.24 (m, 1H).

**<sup>13</sup>C NMR (151 MHz, Chloroform-*d*)**  $\delta$  177.3, 173.1, 143.6, 132.8, 129.7, 127.8, 52.8, 52.8, 46.3, 41.5, 32.3, 32.2, 31.7, 20.9.

**HRMS (ESI+)** [M+Na]<sup>+</sup> calculated m/z for [C<sub>18</sub>H<sub>25</sub>NNaO<sub>6</sub>S]<sup>+</sup>: 406.1295, found: 406.1292

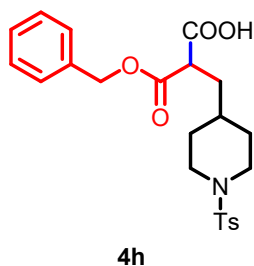

### 3-(benzyloxy)-3-oxo-2-((1-tosylpiperidin-4-yl)methyl)propanoic acid

The general procedure A was followed. Colorless oil. Yield: 58 mg (65%)

**<sup>1</sup>H NMR (600 MHz, Chloroform-*d*)**  $\delta$  7.60 (d,  $J$  = 6.6 Hz, 2H), 7.36 – 7.18 (m, 7H), 5.28 – 5.03 (m, 2H), 3.69 (d,  $J$  = 14.4 Hz, 2H), 3.52 – 3.36 (m, 2H), 2.43 (s, 3H), 2.07 (q,  $J$  = 12.1 Hz, 2H), 1.90 – 1.73 (m, 2H), 1.65 (t,  $J$  = 18.0 Hz, 2H), 1.32 – 1.21 (m, 2H), 1.12 – 1.00 (m, 1H).

**<sup>13</sup>C NMR (126 MHz, Chloroform-*d*)**  $\delta$  173.2, 169.1, 143.6, 135.2, 132.9, 129.6, 128.6, 128.5, 128.5, 128.4, 127.7, 67.3, 49.0, 46.1, 46.1, 34.8, 32.8, 31.1, 30.8, 21.5.

**HRMS (ESI+)** [M+Na]<sup>+</sup> calculated m/z for [C<sub>23</sub>H<sub>27</sub>NNaO<sub>6</sub>S]<sup>+</sup>: 468.1451, found: 468.1447

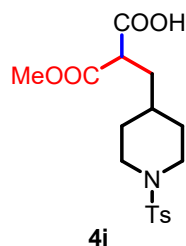

### 3-methoxy-3-oxo-2-((1-tosylpiperidin-4-yl)methyl)propanoic acid

The general procedure A was followed. White Solid. Yield: 51 mg (68%)

**<sup>1</sup>H NMR (600 MHz, Chloroform-*d*)**  $\delta$  7.59 (d,  $J = 7.8$  Hz, 2H), 7.29 (d,  $J = 8.3$  Hz, 2H), 3.75 – 3.65 (m, 5H), 3.40 (t,  $J = 7.6$  Hz, 1H), 2.39 (s, 3H), 2.16 (t,  $J = 11.9$  Hz, 2H), 1.86 – 1.74 (m, 2H), 1.70 (d,  $J = 12.4$  Hz, 2H), 1.32 – 1.11 (m, 3H).

**<sup>13</sup>C NMR (151 MHz, Chloroform-*d*)**  $\delta$  173.9, 169.5, 143.6, 132.9, 129.6, 127.6, 52.7, 48.8, 46.1, 34.7, 32.9, 31.0, 21.5.

**HRMS (ESI+)** [M+Na]<sup>+</sup> calculated  $m/z$  for [C<sub>17</sub>H<sub>23</sub>NNaO<sub>6</sub>S]<sup>+</sup>: 392.1138, found: 392.1132

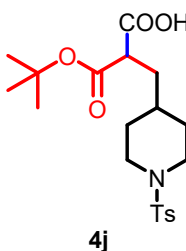

### 3-(tert-butoxy)-3-oxo-2-((1-tosylpiperidin-4-yl)methyl)propanoic acid

The general procedure A was followed. White Solid. Yield: 59 mg (72%)

**<sup>1</sup>H NMR (600 MHz, Chloroform-*d*)**  $\delta$  7.58 (d,  $J = 8.3$  Hz, 2H), 7.29 (d,  $J = 8.1$  Hz, 2H), 3.66 (d,  $J = 11.4$  Hz, 2H), 2.40 (s, 3H), 2.17 (t,  $J = 11.6$  Hz, 2H), 1.83 – 1.75 (m, 2H), 1.70 – 1.62 (m, 2H), 1.39 (s, 9H), 1.36 – 1.25 (m, 6H).

**<sup>13</sup>C NMR (126 MHz, Chloroform-*d*)**  $\delta$  177.7, 171.9, 143.5, 132.8, 129.6, 127.7, 82.6, 53.4, 46.3, 41.2, 32.3, 32.2, 31.7, 27.7, 21.5, 20.8.

**HRMS (ESI+)** [M-H]<sup>-</sup> calculated  $m/z$  for [C<sub>20</sub>H<sub>28</sub>NO<sub>6</sub>S]<sup>-</sup>: 410.1643, found: 410.1637

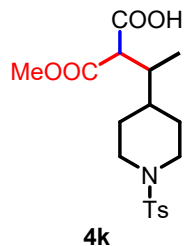

### 2-(methoxycarbonyl)-3-(1-tosylpiperidin-4-yl)butanoic acid

The general procedure A was followed. Colorless oil. Yield: 37 mg (48%). dr = 1:1

**<sup>1</sup>H NMR (600 MHz, Chloroform-*d*)**  $\delta$  7.59 (d, *J* = 8.5 Hz, 2H), 7.29 (d, *J* = 7.9 Hz, 2H), 3.79 (d, *J* = 11.7 Hz, 2H), 3.68 (s, 3H), 3.42 – 3.33 (m, 1H), 2.39 (s, 3H), 2.19 – 2.03 (m, 3H), 1.72 – 1.55 (m, 2H), 1.51 – 1.42 (m, 1H), 1.38 – 1.17 (m, 2H), 0.94 – 0.84 (m, 3H).

**<sup>13</sup>C NMR (151 MHz, Chloroform-*d*)**  $\delta$  173.0, 172.7, 169.7, 169.2, 143.6, 133.0, 132.9, 129.7, 127.7, 54.6, 54.4, 52.7, 52.5, 46.5, 46.4, 37.8, 37.7, 29.7, 26.8, 26.6, 21.5, 13.1, 13.0.

**HRMS (ESI+)** [M+Na]<sup>+</sup> calculated m/z for [C<sub>18</sub>H<sub>25</sub>NNaO<sub>6</sub>S]<sup>+</sup>: 406.1295, found: 406.1290

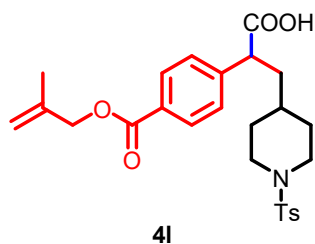

### 2-(4-(((2-methylallyl)oxy)carbonyl)phenyl)-3-(1-tosylpiperidin-4-yl)propanoic acid

The general procedure A was followed. White Solid. Yield: 72 mg (74%)

**<sup>1</sup>H NMR (600 MHz, Chloroform-*d*)**  $\delta$  7.99 (d, *J* = 8.3 Hz, 2H), 7.59 (d, *J* = 8.2 Hz, 2H), 7.33 (d, *J* = 8.3 Hz, 2H), 7.28 (d, *J* = 8.0 Hz, 2H), 5.00 (d, *J* = 43.0 Hz, 2H), 4.72 (s, 2H), 3.76 – 3.64 (m, 3H), 2.40 (s, 3H), 2.13 – 2.05 (m, 2H), 2.02 – 1.94 (m, 1H), 1.81 (s, 3H), 1.79 – 1.64 (m, 3H), 1.36 – 1.23 (m, 3H), 1.10 – 1.00 (m, 1H).

**<sup>13</sup>C NMR (151 MHz, Chloroform-*d*)**  $\delta$  178.3, 165.9, 143.6, 143.2, 139.9, 133.0, 130.2, 129.7, 129.7, 128.2, 127.7, 113.1, 68.3, 48.4, 46.2, 46.2, 39.0, 32.7, 31.5, 31.0, 21.5, 19.6.

**HRMS (ESI+)** [M+Na]<sup>+</sup> calculated m/z for [C<sub>26</sub>H<sub>31</sub>NNaO<sub>6</sub>S]<sup>+</sup>: 508.1764, found: 508.1761



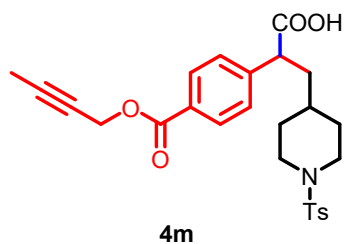

**2-(4-((but-2-yn-1-yloxy)carbonyl)phenyl)-3-(1-tosylpiperidin-4-yl)propanoic acid**

The general procedure A was followed. Colorless oil. Yield: 77 mg (79%).

**<sup>1</sup>H NMR (600 MHz, Chloroform-*d*)**  $\delta$  7.97 (d, *J* = 7.7 Hz, 2H), 7.57 (d, *J* = 7.8 Hz, 2H), 7.29 (dd, *J* = 26.8, 8.1 Hz, 4H), 5.04 – 4.70 (m, 2H), 3.83 – 3.46 (m, 3H), 2.39 (s, 3H), 2.07 (q, *J* = 13.1 Hz, 2H), 2.01 – 1.91 (m, 1H), 1.89 – 1.81 (m, 3H), 1.78 – 1.61 (m, 3H), 1.35 – 1.23 (m, 2H), 1.10 – 0.95 (m, 1H).

**<sup>13</sup>C NMR (126 MHz, Chloroform-*d*)**  $\delta$  178.6, 165.6, 143.5, 143.2, 132.8, 130.2, 129.6, 129.1, 128.1, 127.6, 83.4, 73.1, 53.4, 48.4, 46.2, 46.1, 38.9, 32.6, 31.4, 31.9, 21.5, 3.6.

**HRMS (ESI+)** [M+Na]<sup>+</sup> calculated *m/z* for [C<sub>26</sub>H<sub>29</sub>NNaO<sub>6</sub>S]<sup>+</sup>: 506.1608, found: 506.1605

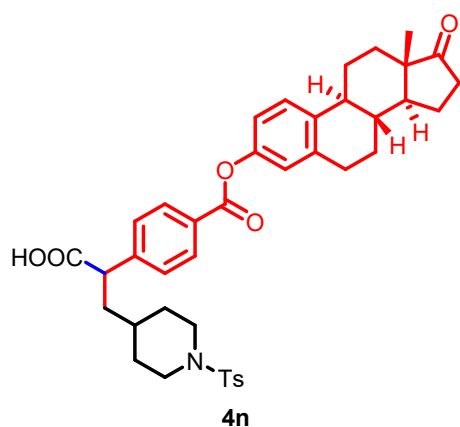

**2-(4-(((8R,9S,13S,14S)-13-methyl-17-oxo-7,8,9,11,12,13,14,15,16,17-decahydro-6H-cyclopenta[a]phenanthren-3-yl)oxy)carbonyl)phenyl)-3-(1-tosylpiperidin-4-yl)propanoic acid**

The general procedure A was followed. White Solid. Yield: 85 mg (62%)

**<sup>1</sup>H NMR (600 MHz, Chloroform-*d*)**  $\delta$  8.10 (d, *J* = 8.4 Hz, 2H), 7.59 (d, *J* = 8.1 Hz, 2H), 7.39 (d, *J* = 8.3 Hz, 2H), 7.31 (d, *J* = 8.5 Hz, 1H), 7.28 (d, *J* = 8.0 Hz, 2H), 6.93 (dd, *J* = 8.5, 2.6 Hz, 1H), 6.89 (d, *J* = 2.5 Hz, 1H), 3.78 – 3.67 (m, 3H), 2.99 – 2.85 (m, 2H), 2.50 (dd,

$J = 19.1, 8.8$  Hz, 1H), 2.40 (s, 4H), 2.33 – 2.25 (m, 1H), 2.18 – 1.92 (m, 7H), 1.79 – 1.40 (m, 9H), 1.37 – 1.27 (m, 2H), 1.13 – 1.03 (m, 1H), 0.90 (s, 3H).

**$^{13}\text{C}$  NMR (126 MHz, Chloroform-*d*)**  $\delta$  221.3, 178.0, 165.0, 148.7, 143.8, 143.6, 138.2, 137.6, 132.9, 130.7, 129.7, 129.1, 128.3, 127.7, 126.5, 121.6, 118.8, 50.4, 48.5, 48.0, 46.2, 46.2, 44.2, 39.0, 38.0, 35.9, 32.8, 31.5, 31.0, 29.5, 26.4, 25.8, 21.6, 21.6, 13.9.

**HRMS (ESI+)**  $[\text{M}+\text{Na}]^+$  calculated  $m/z$  for  $[\text{C}_{40}\text{H}_{45}\text{NNaO}_7\text{S}]^+$ : 706.2809, found: 706.2802

## 6. Reference

1. C. W. Cheung; F. E. Zhurkin, X. Hu, , Z-Selective Olefin Synthesis via Iron-Catalyzed Reductive Coupling of Alkyl Halides with Terminal Arylalkynes. *J. Am. Chem. Soc.* 2015, **137**, 4932-4935.
2. C. M. McMahon, E. J. Alexanian , Palladium-catalyzed Heck-type cross-couplings of unactivated alkyl iodides. *Angew. Chem. Int. Ed.* 2014, **53**, 5974-5977.
3. D. Qian, X. Hu, , Ligand-Controlled Regiodivergent Hydroalkylation of Pyrrolines. *Angew. Chem. Int. Ed.* 2019, **58**, 18519-18523.
4. Soulard, V.; Villa, G.; Vollmar, D. P.; Renaud, P., Radical Deuteration with  $\text{D}_2\text{O}$ : Catalysis and Mechanistic Insights. *J. Am. Chem. Soc.* 2018, **140**, 155-158.
5. M. Tissot, N. Body, S. Petit, J. Claessens, C. Genicot, P. Pasau, Synthesis of Electron-Deficient Heteroaromatic 1,3-Substituted Cyclobutyls via Zinc Insertion/Negishi Coupling Sequence under Batch and Automated Flow Conditions. *Org. Lett.* 2018, **20**, 8022-8025.
6. L. Caiger, C. Sinton,; T. Constantin ; J. J. Douglas, N. S. Sheikh, F. Julia,; D. Leonori , Radical Hydroxymethylation of Alkyl Iodides Using Formaldehyde as a C1 Synthon. *Chem. Sci.* 2021, **12**, 10448-10454.

# 7. NMR Spectra

**3a**

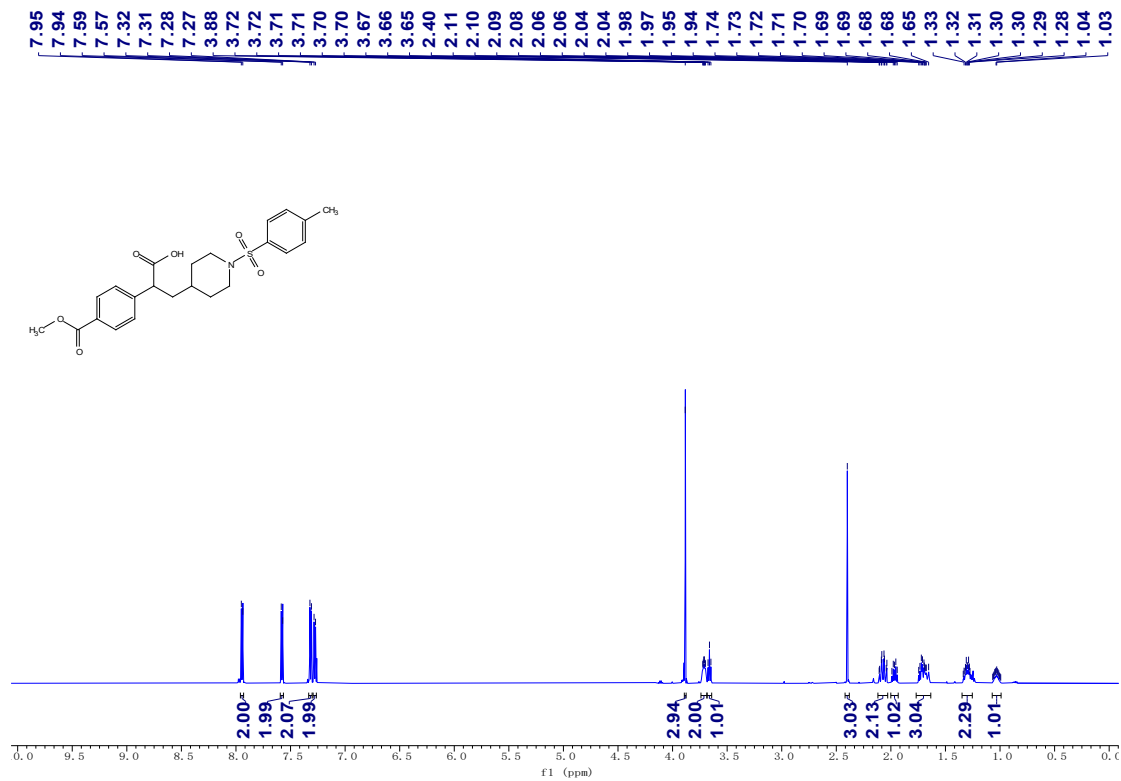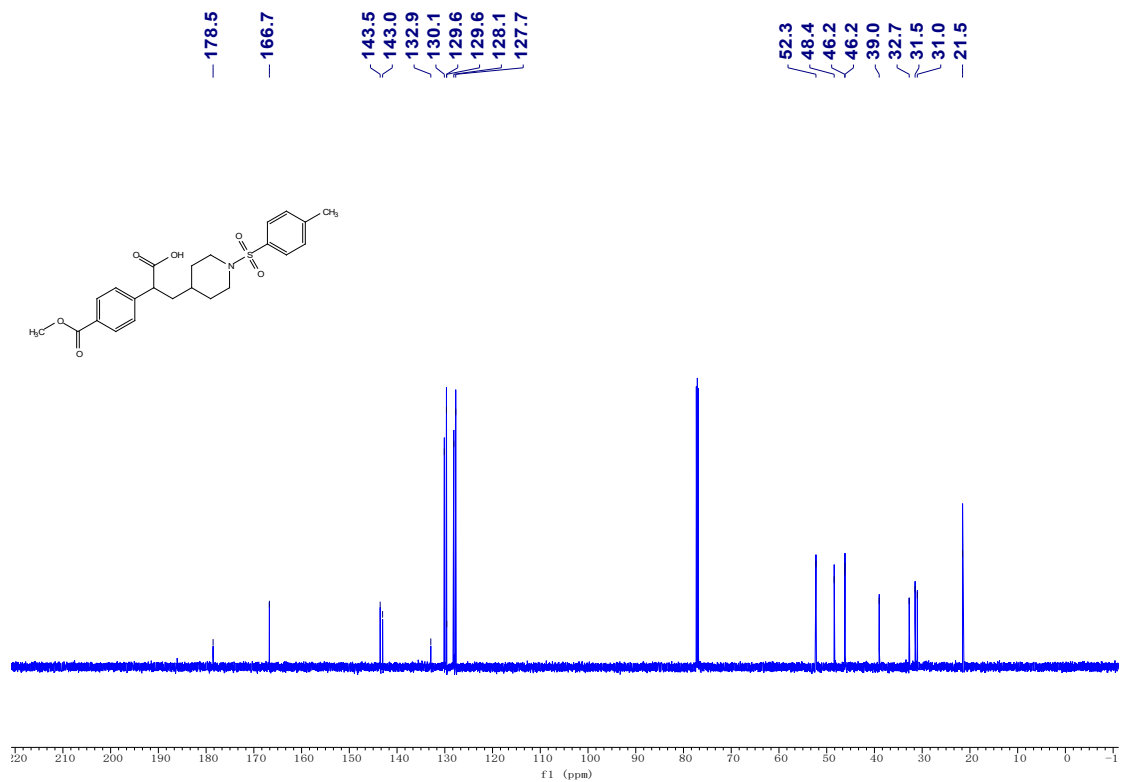

### 3b

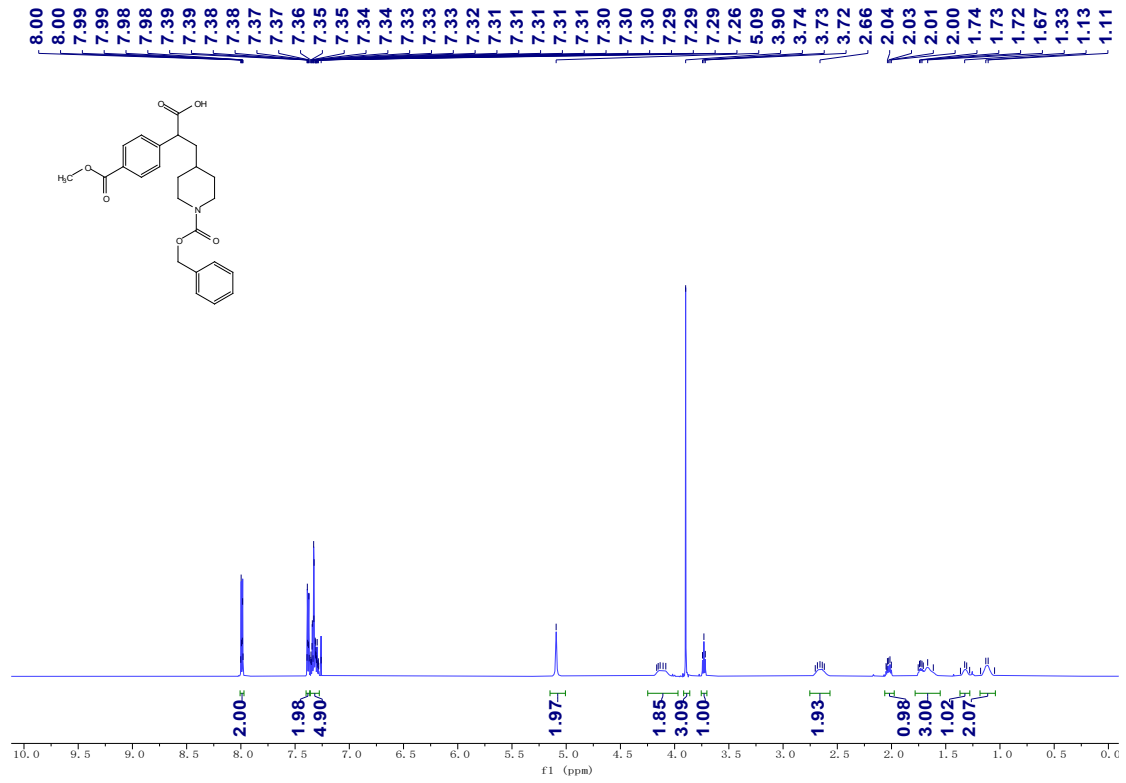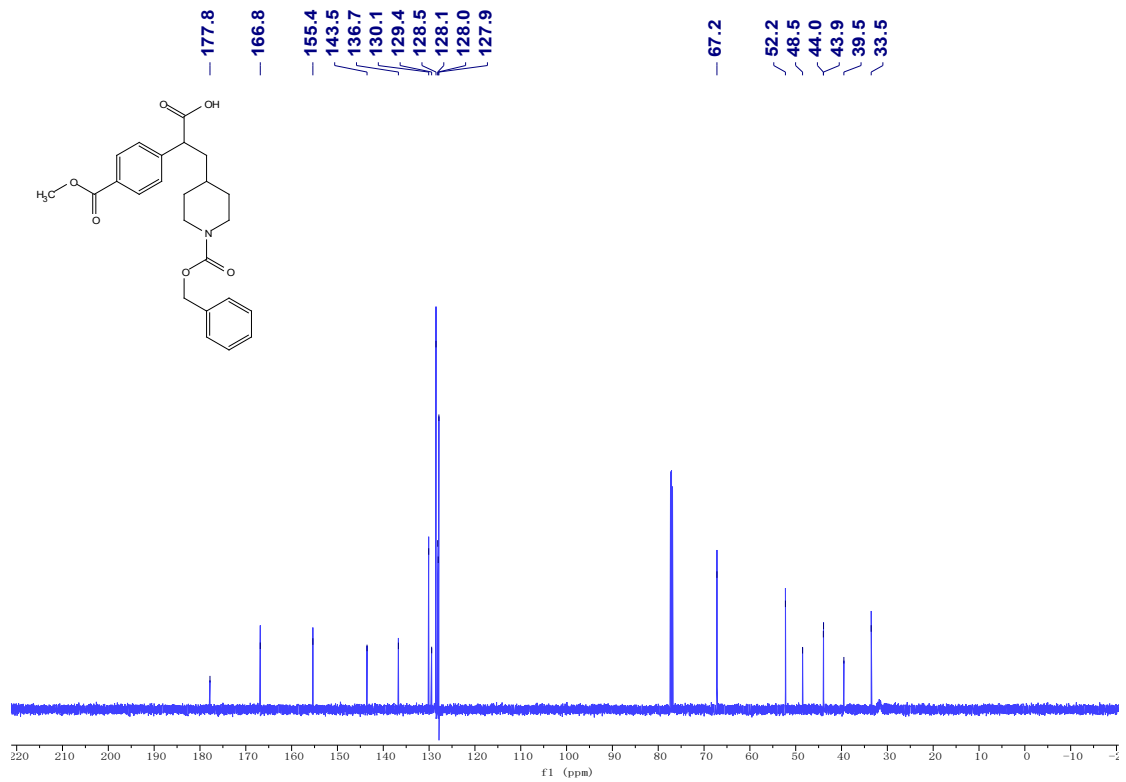

3c

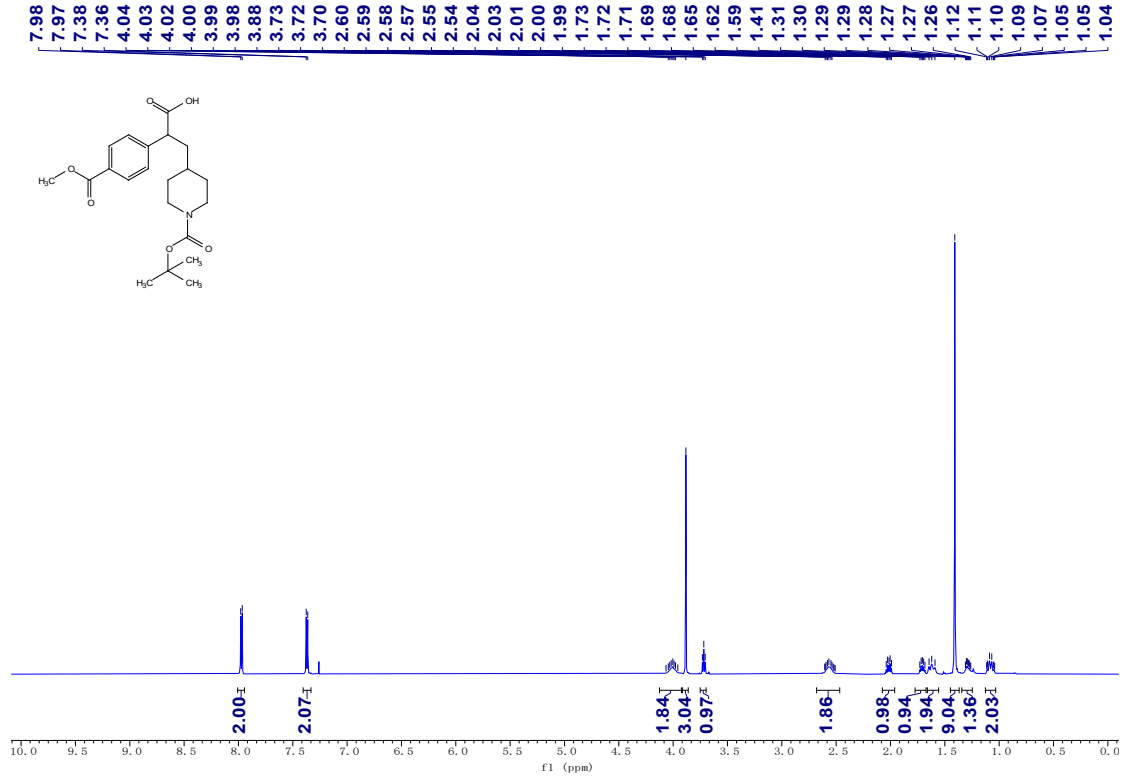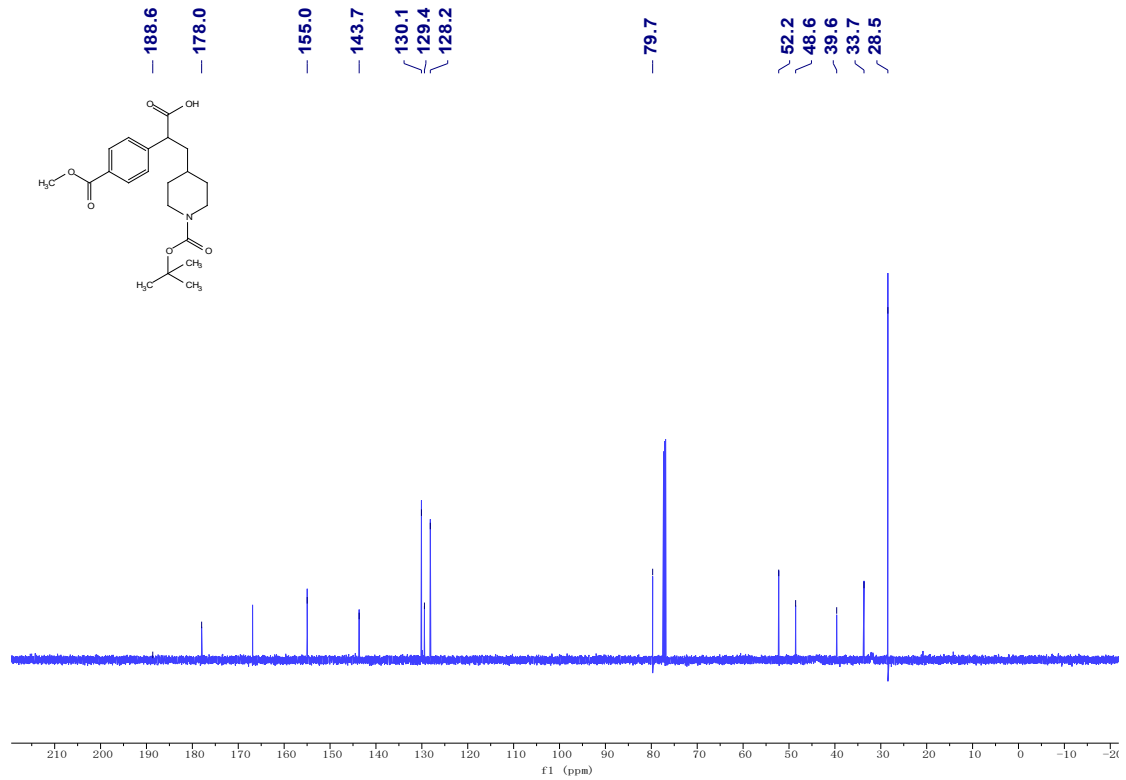

### 3d

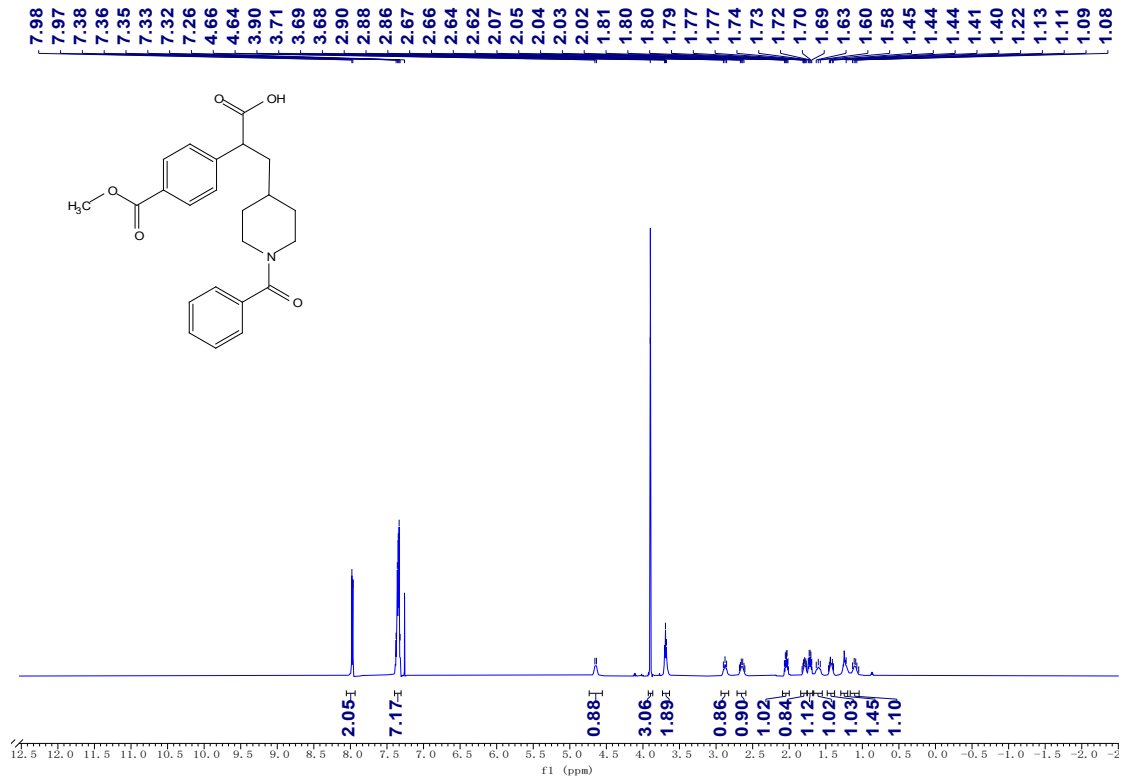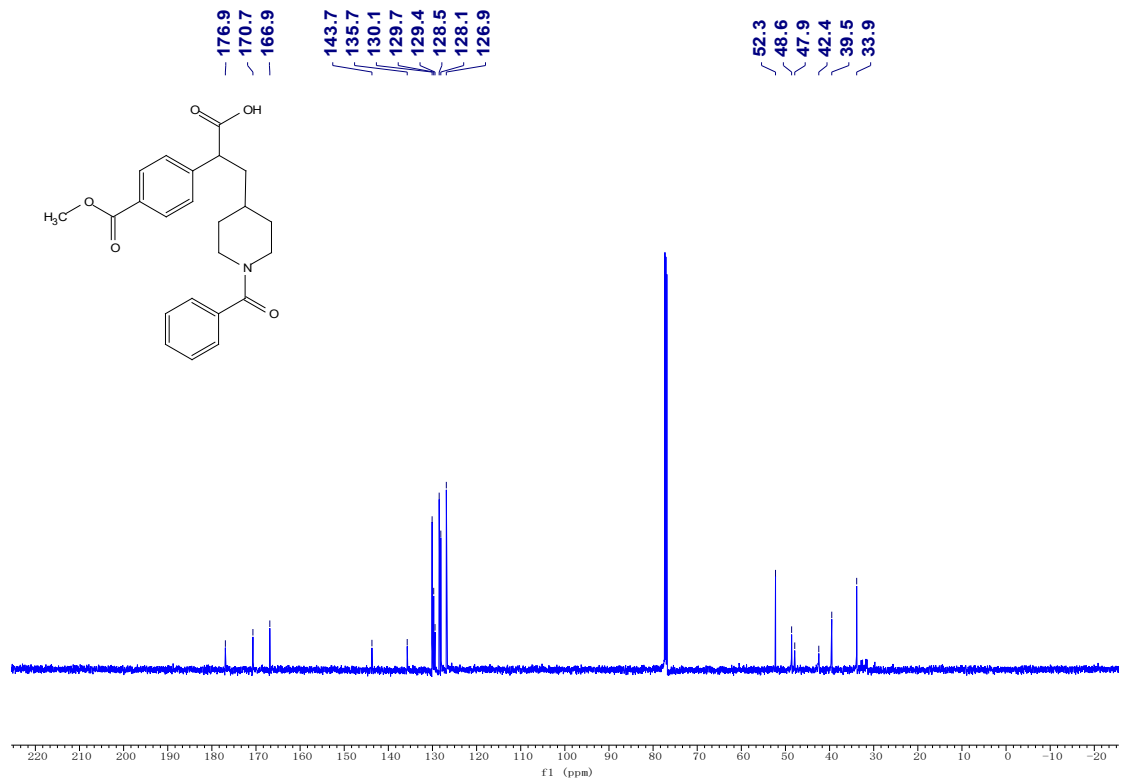

3e

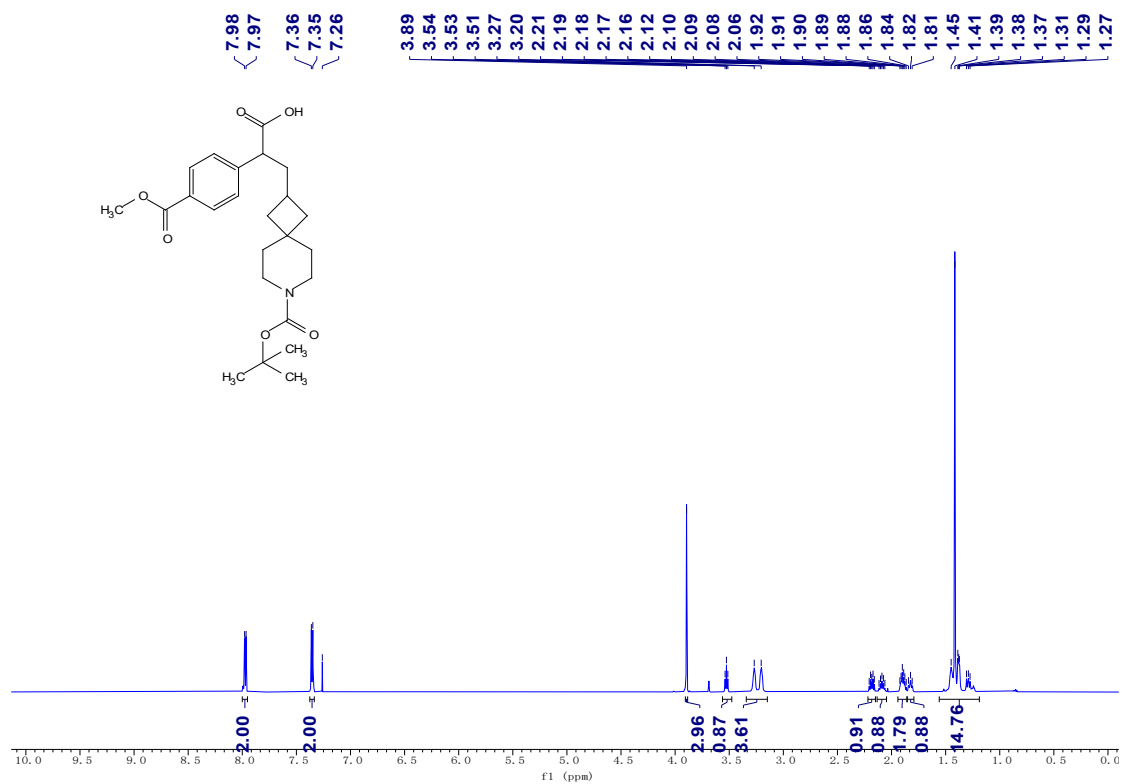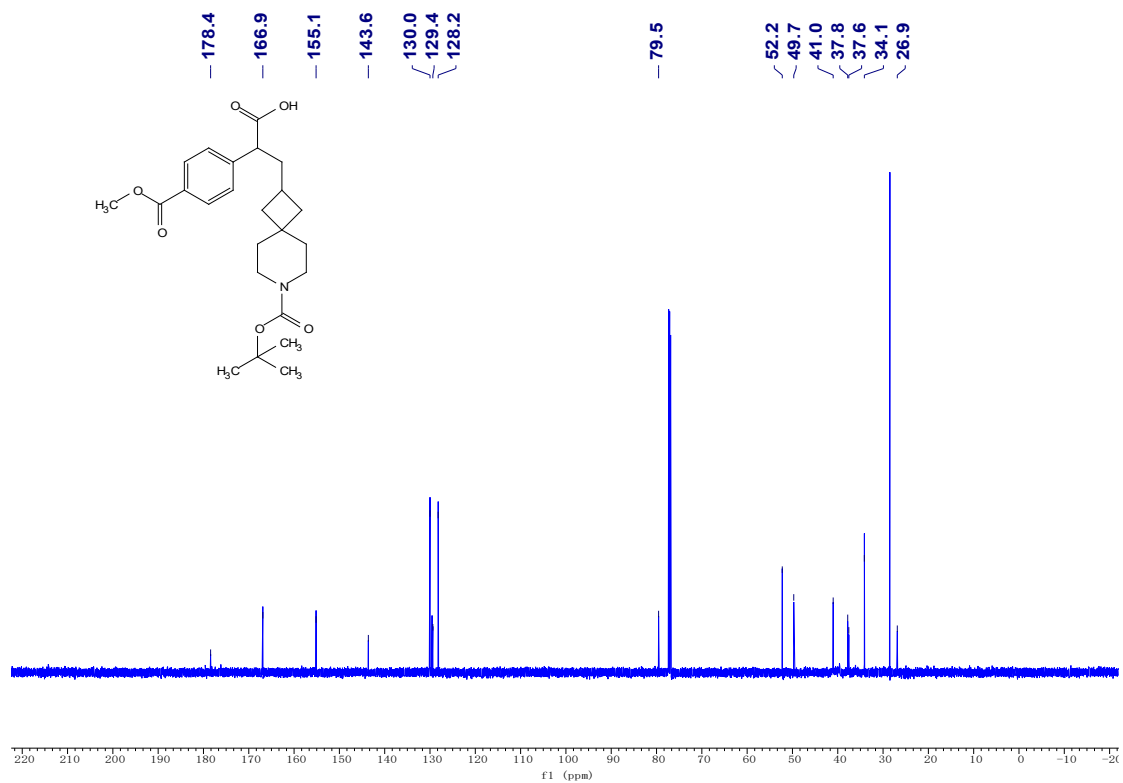

### 3f

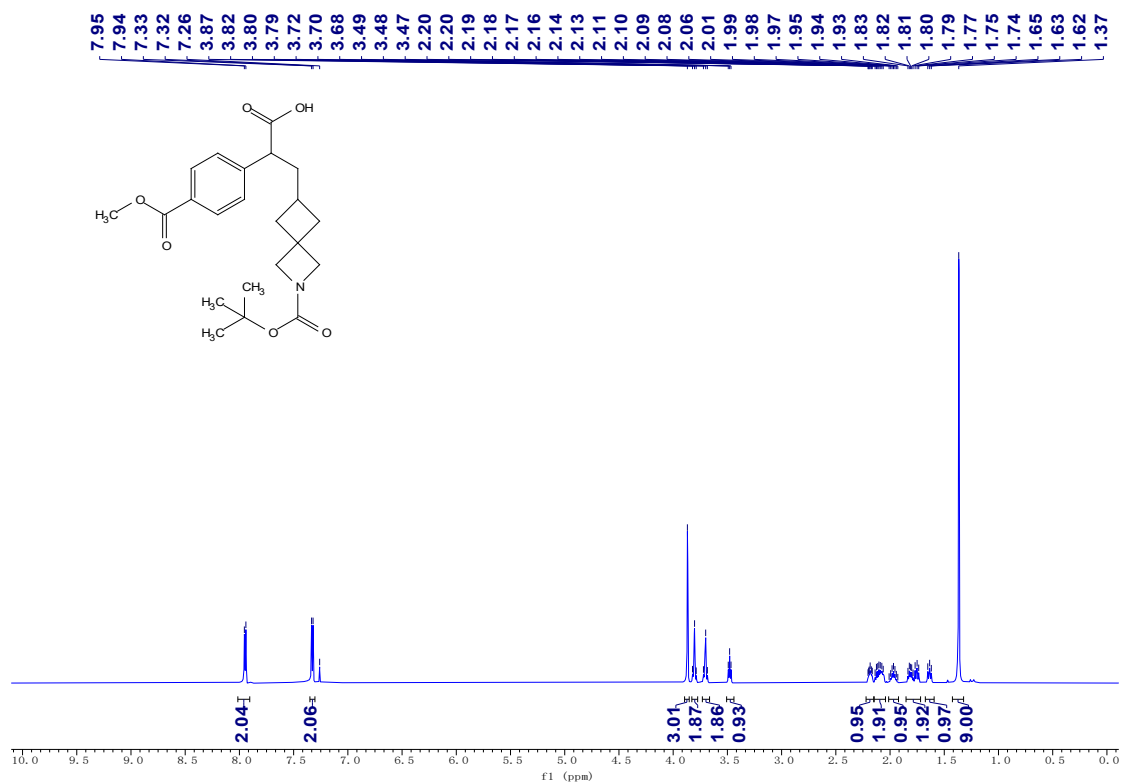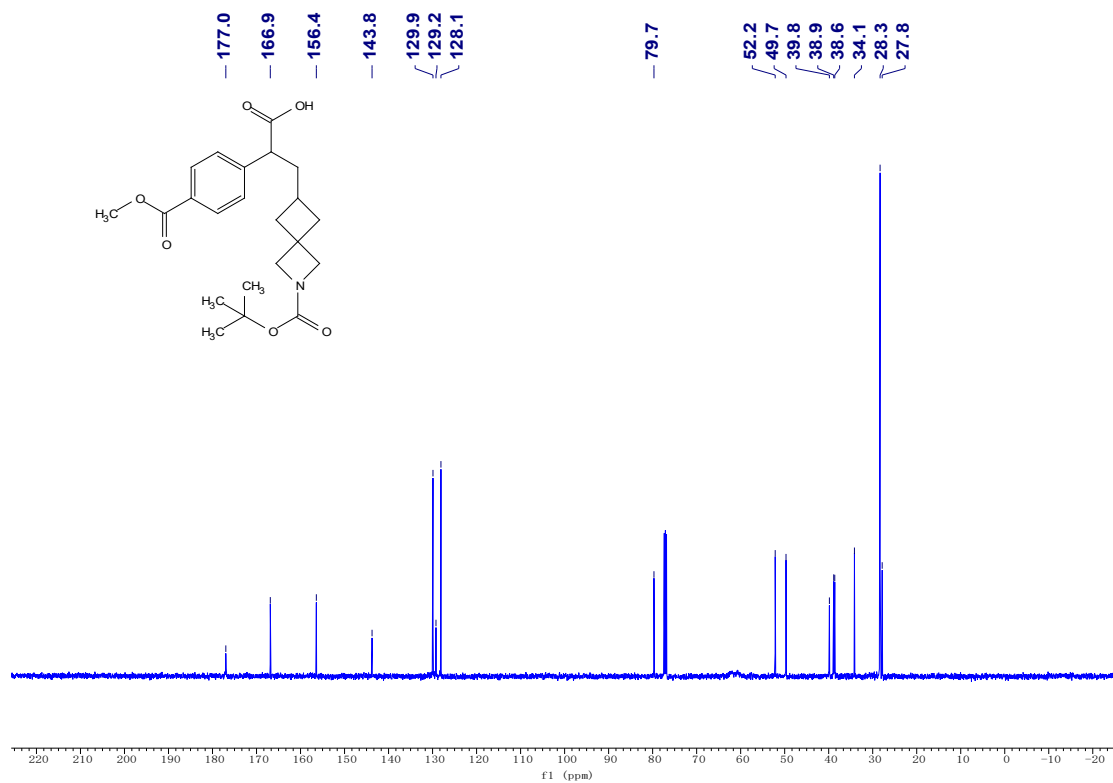



### 3g

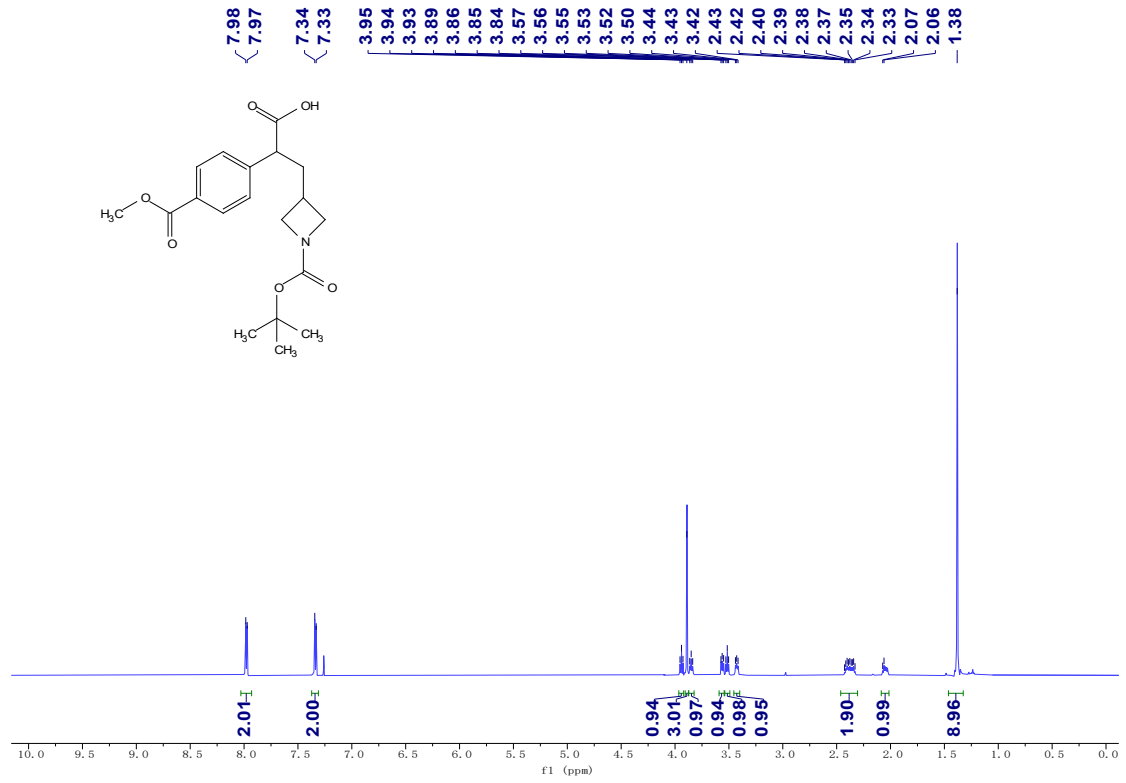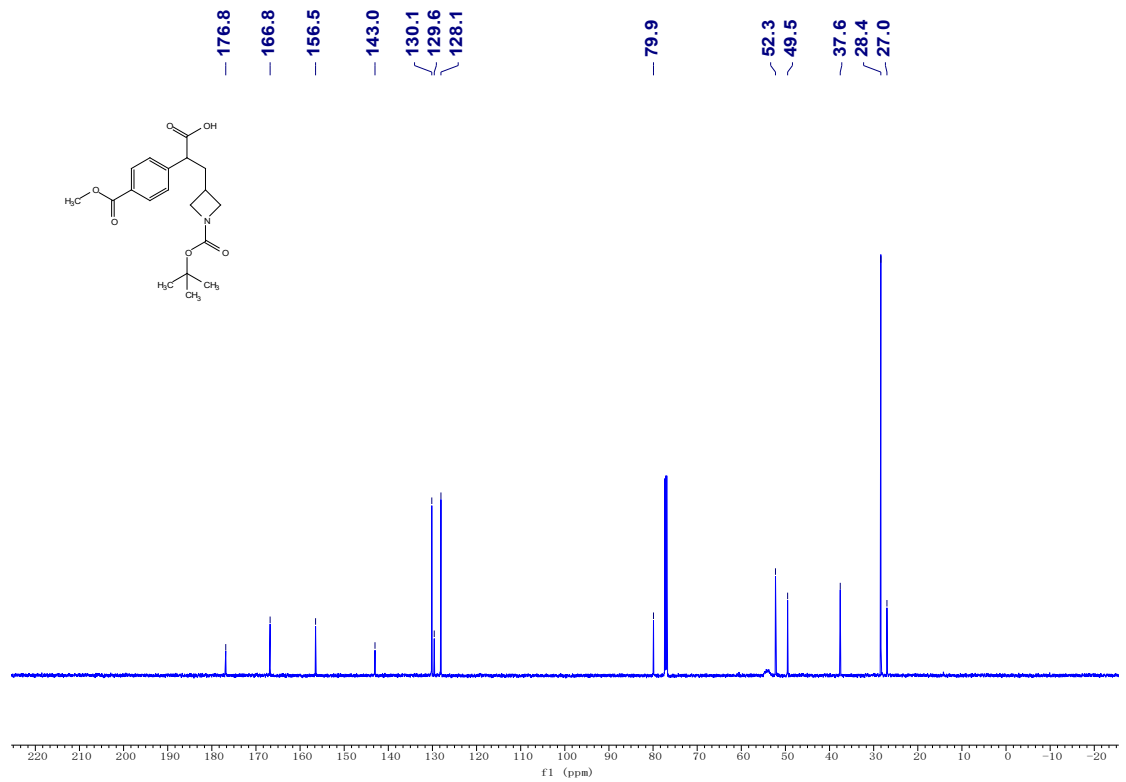

### 3h

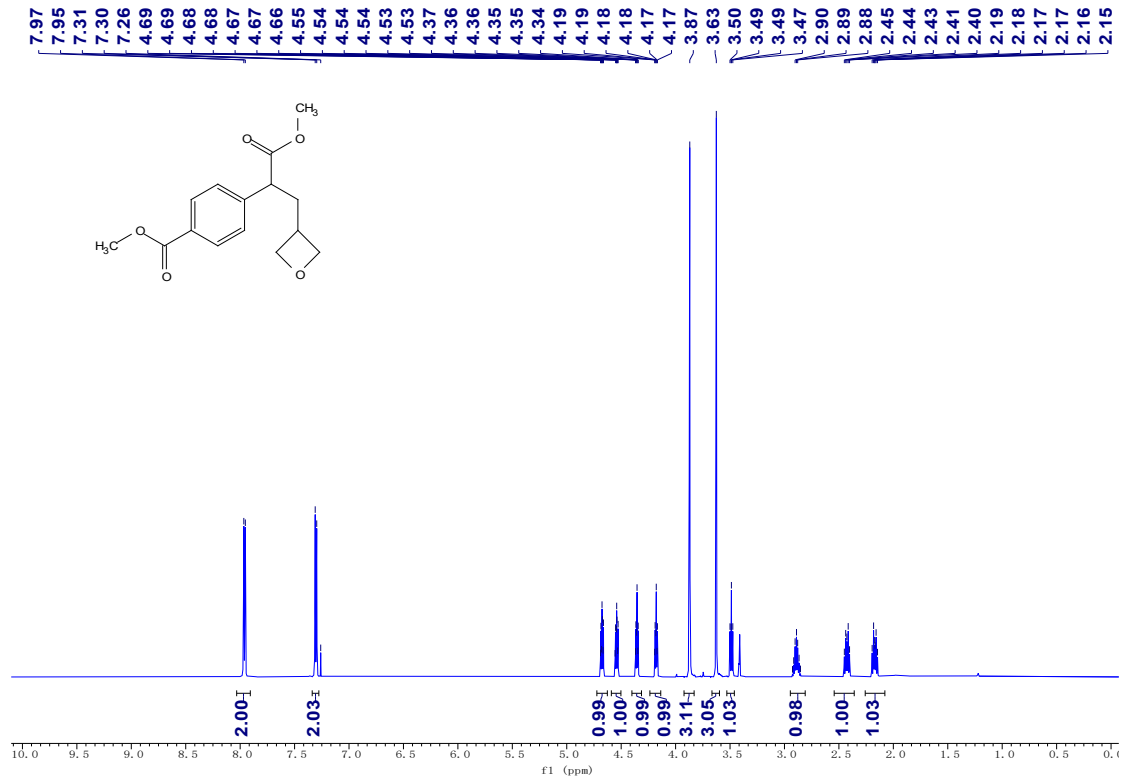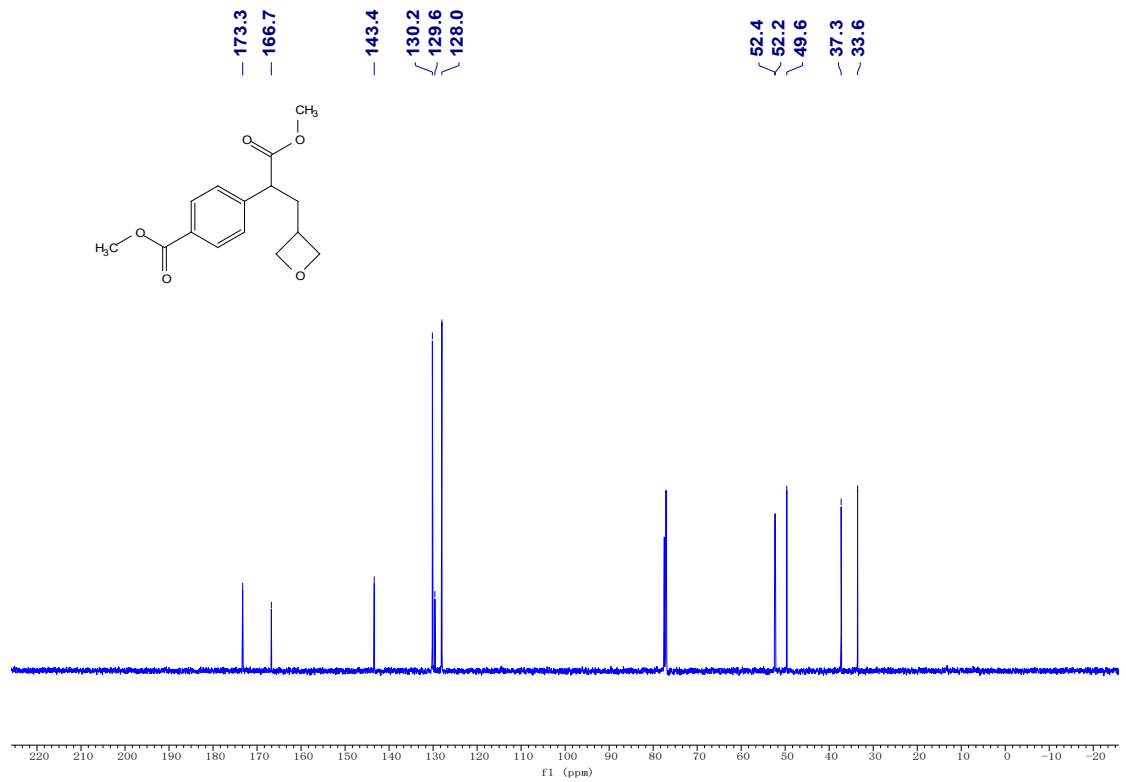

3i

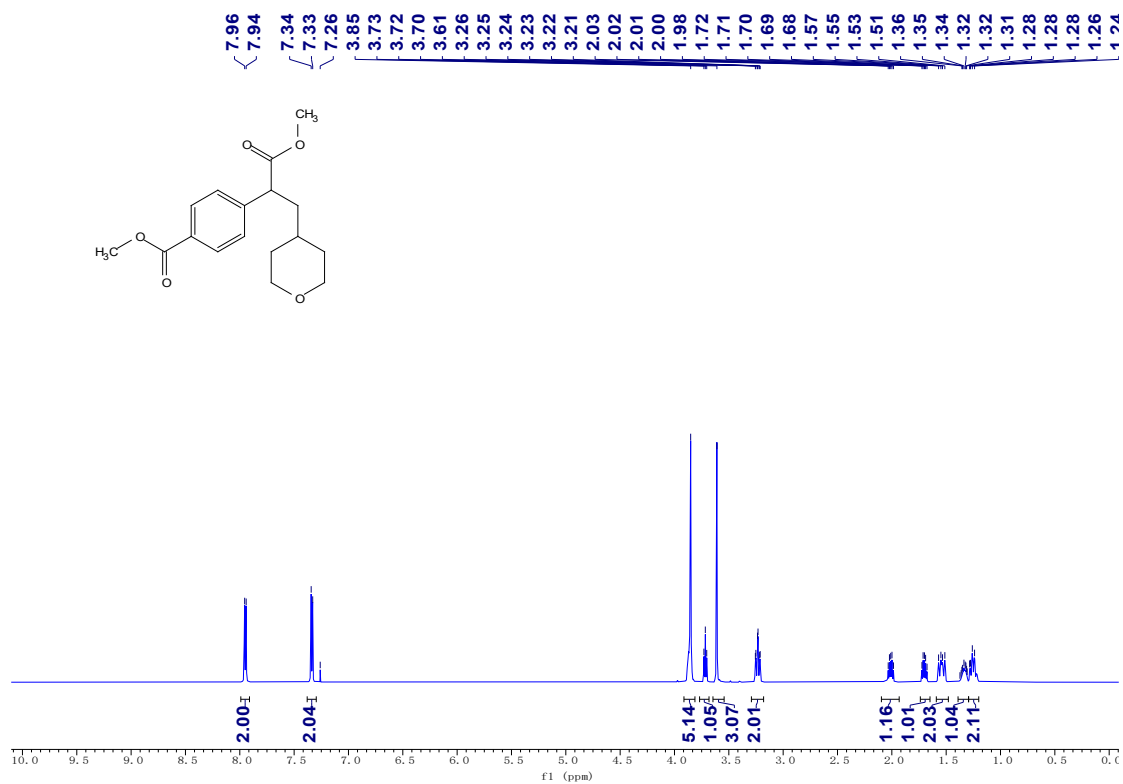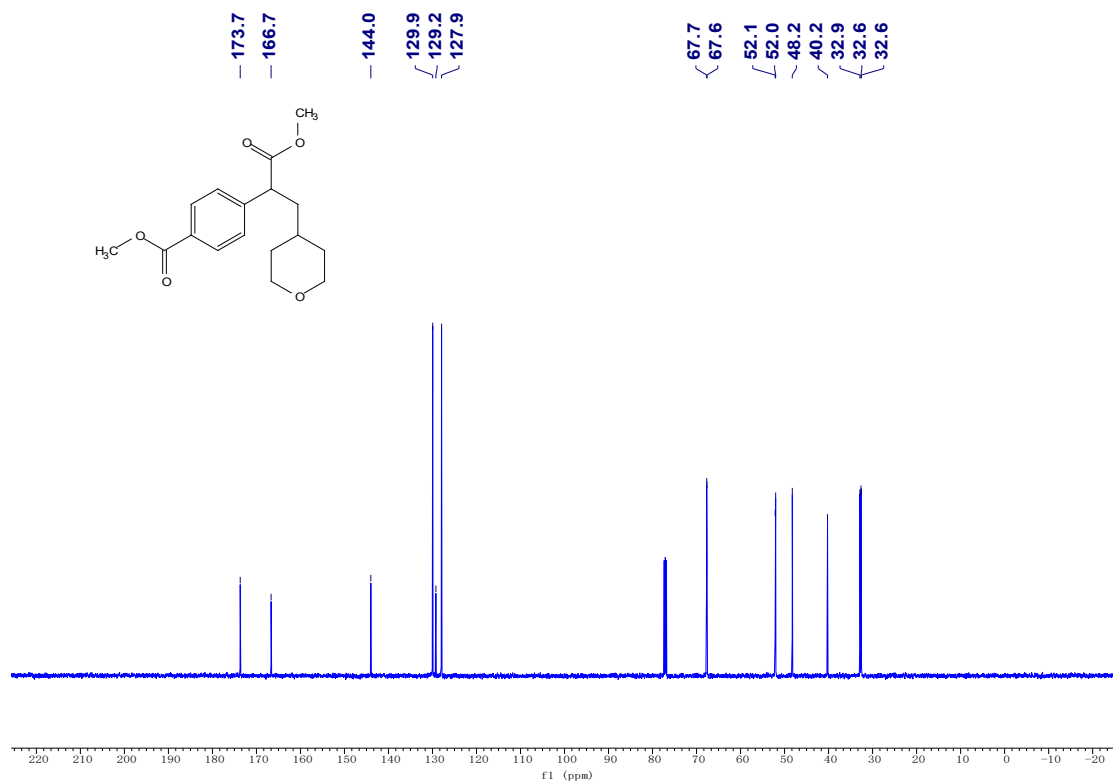

3j

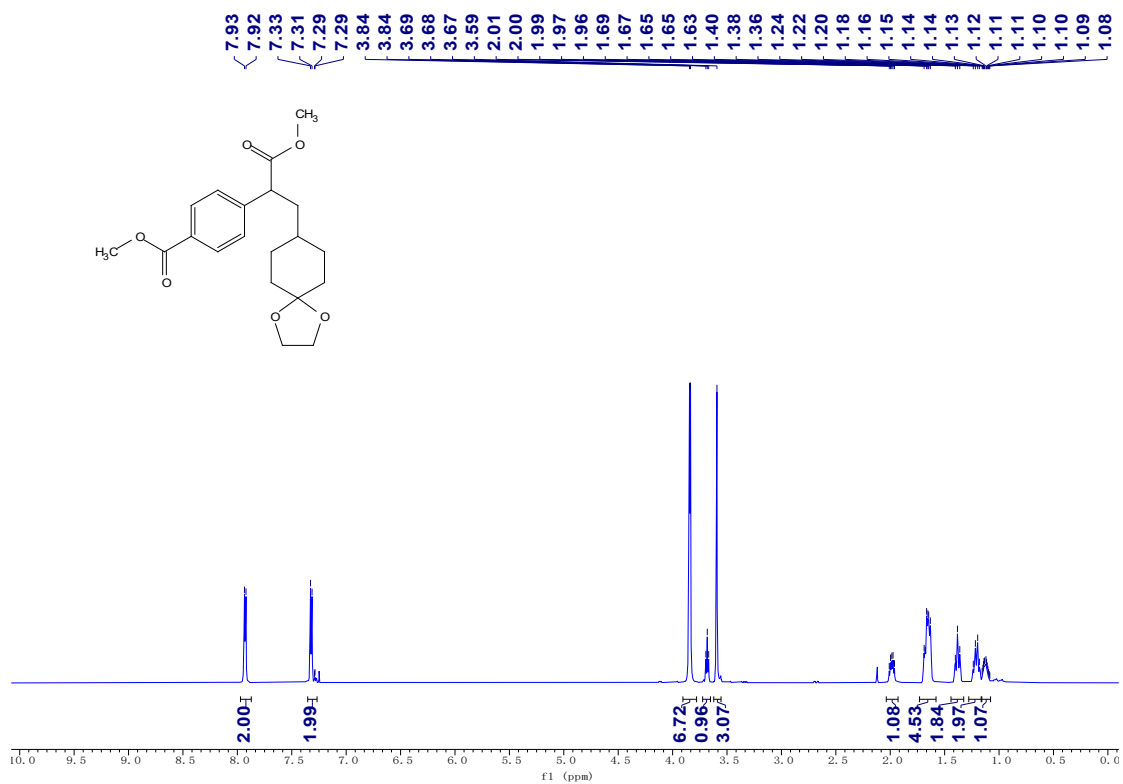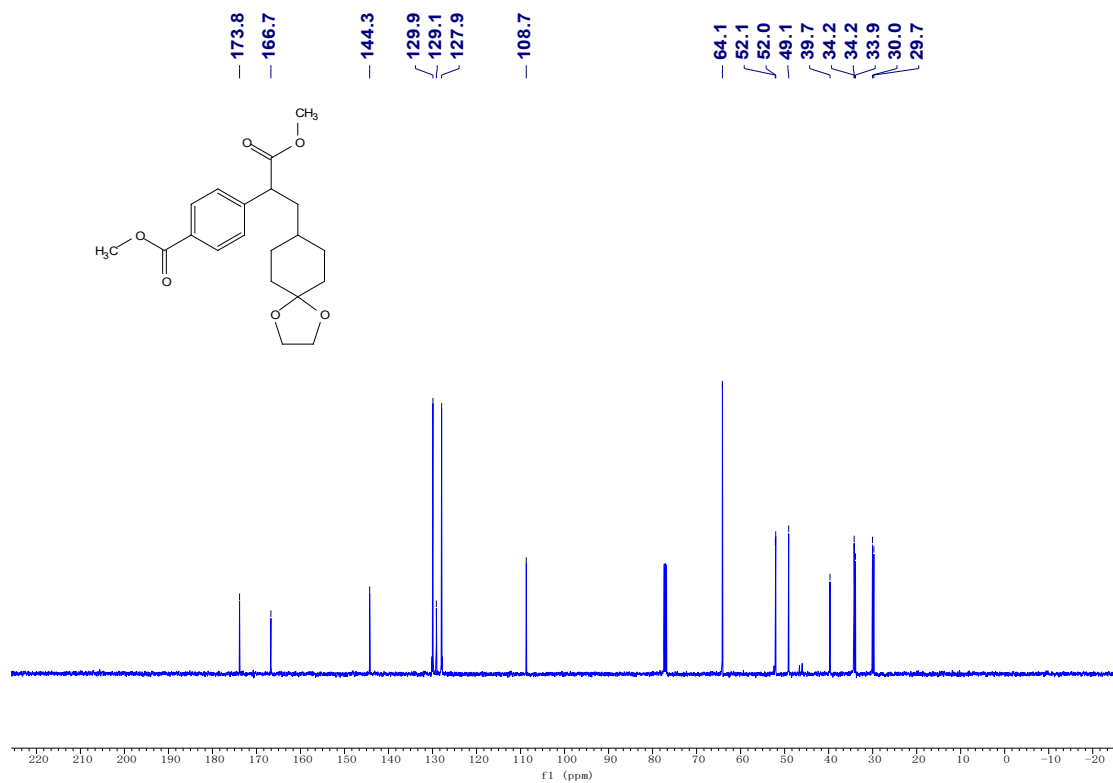

### 3k

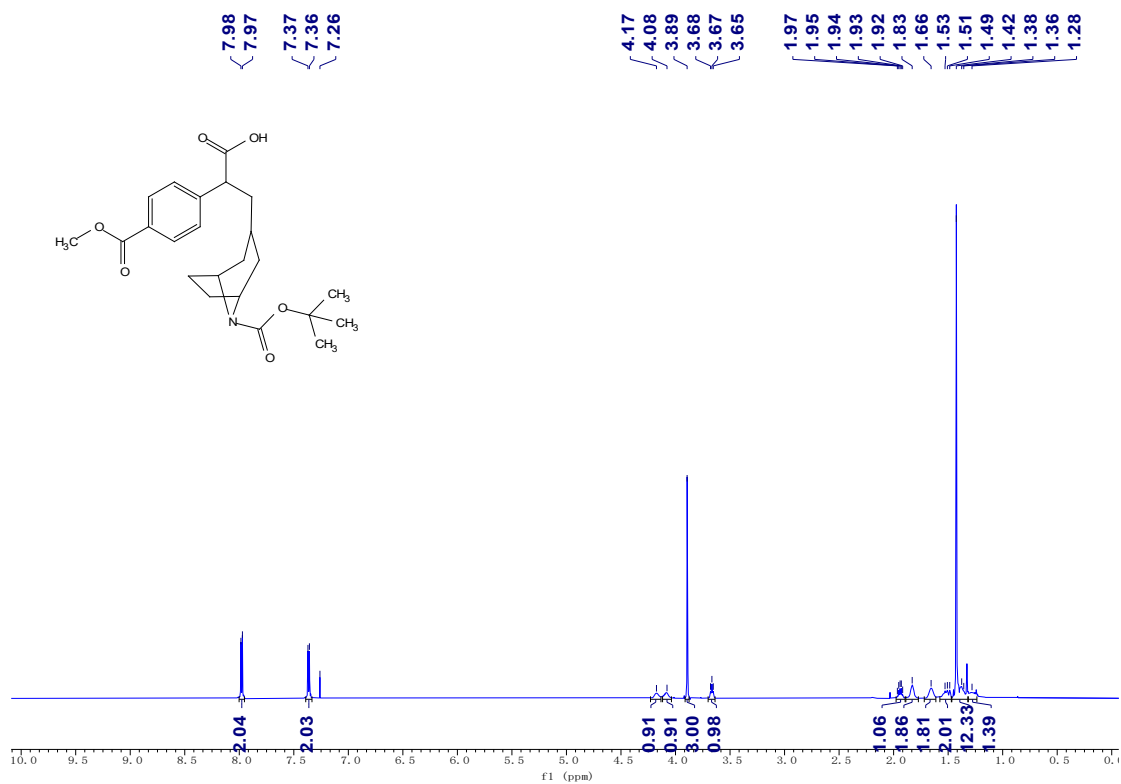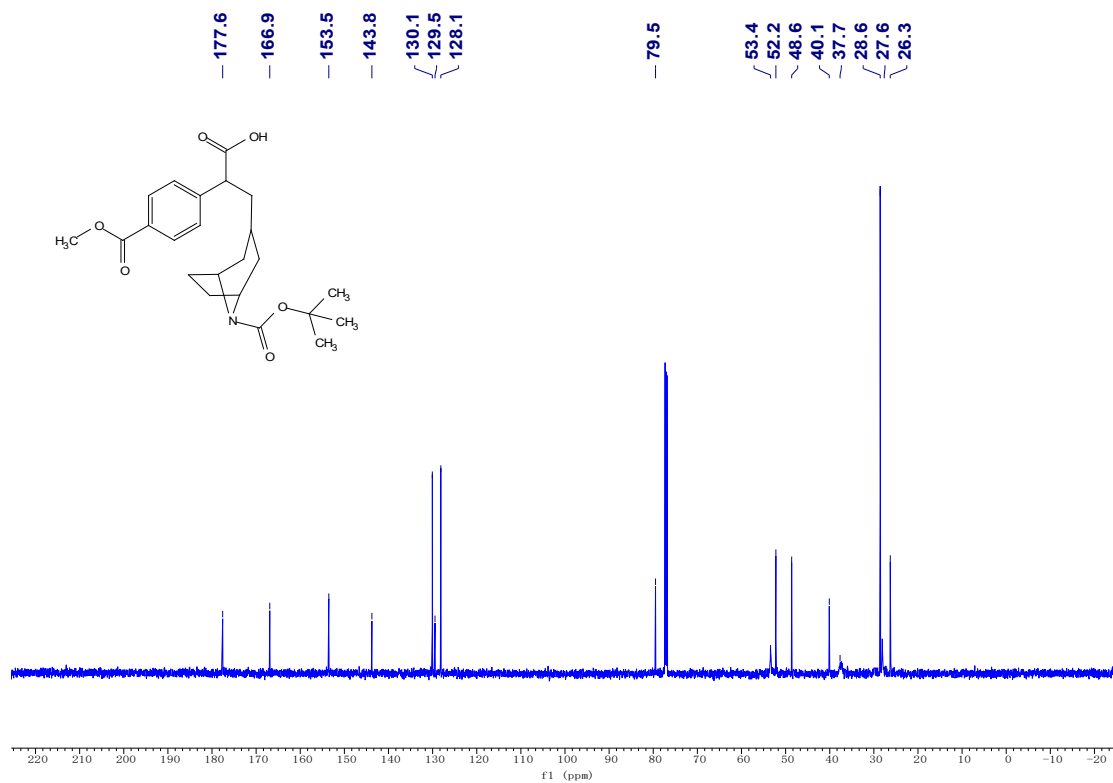

### 31

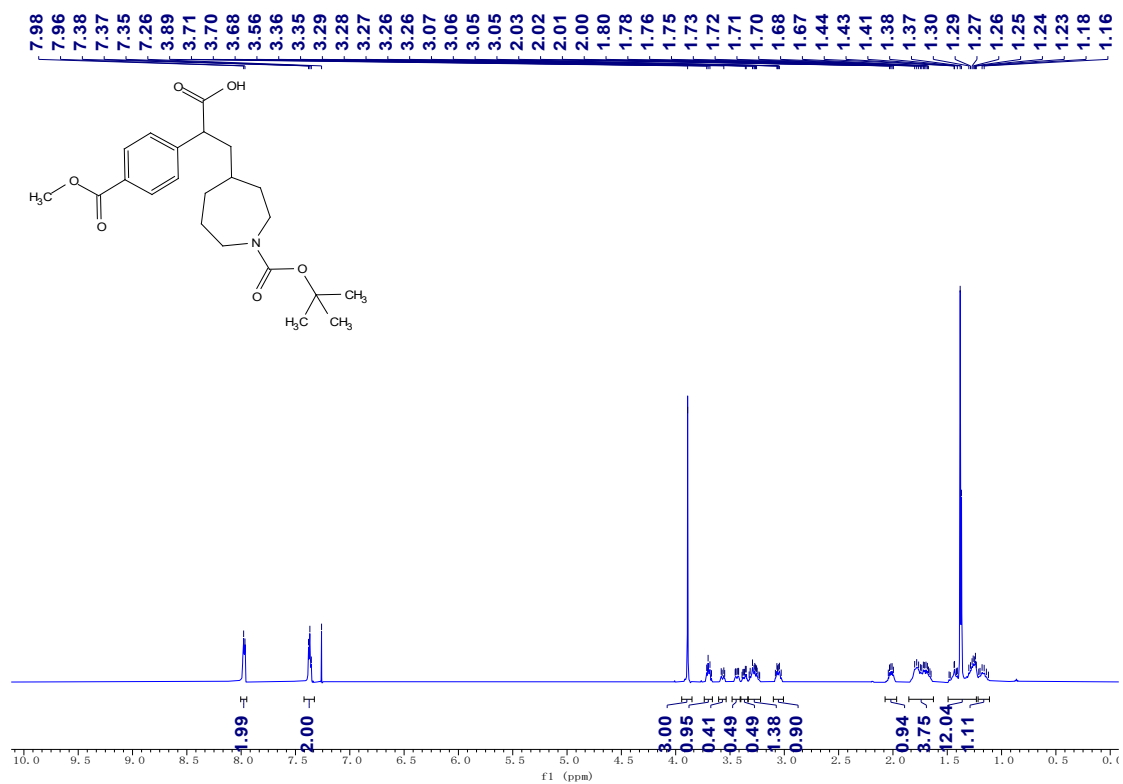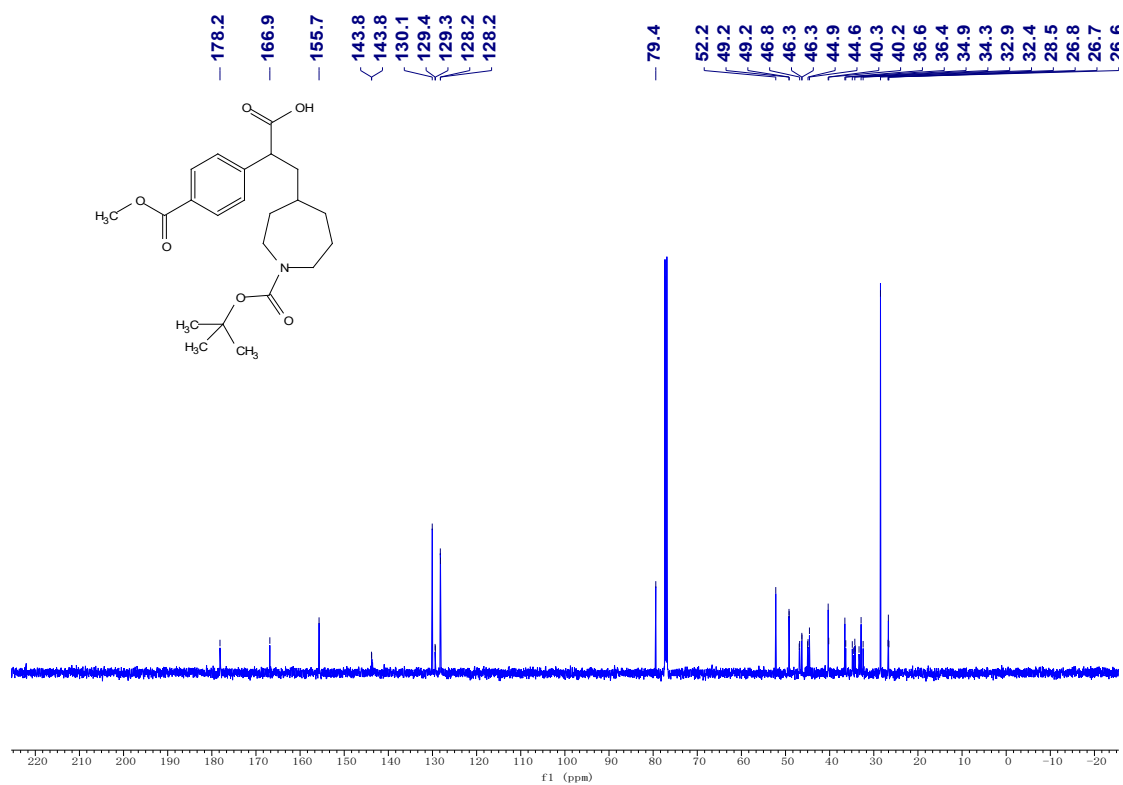

### 3m

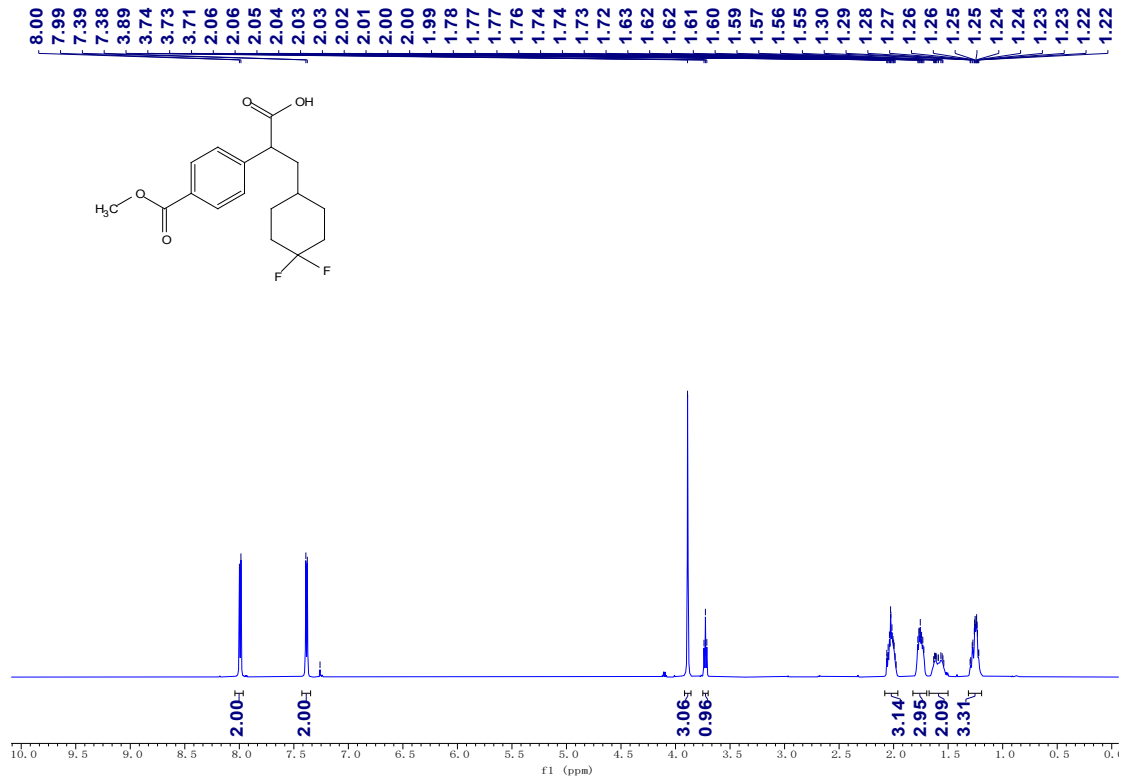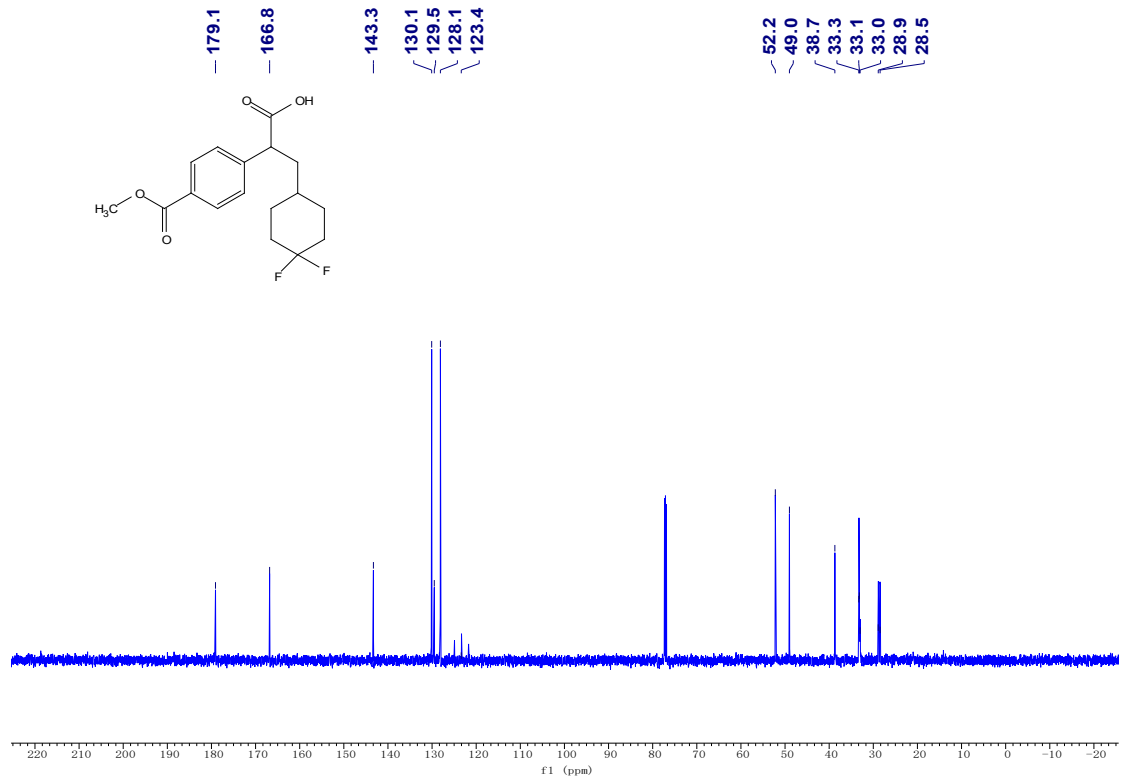

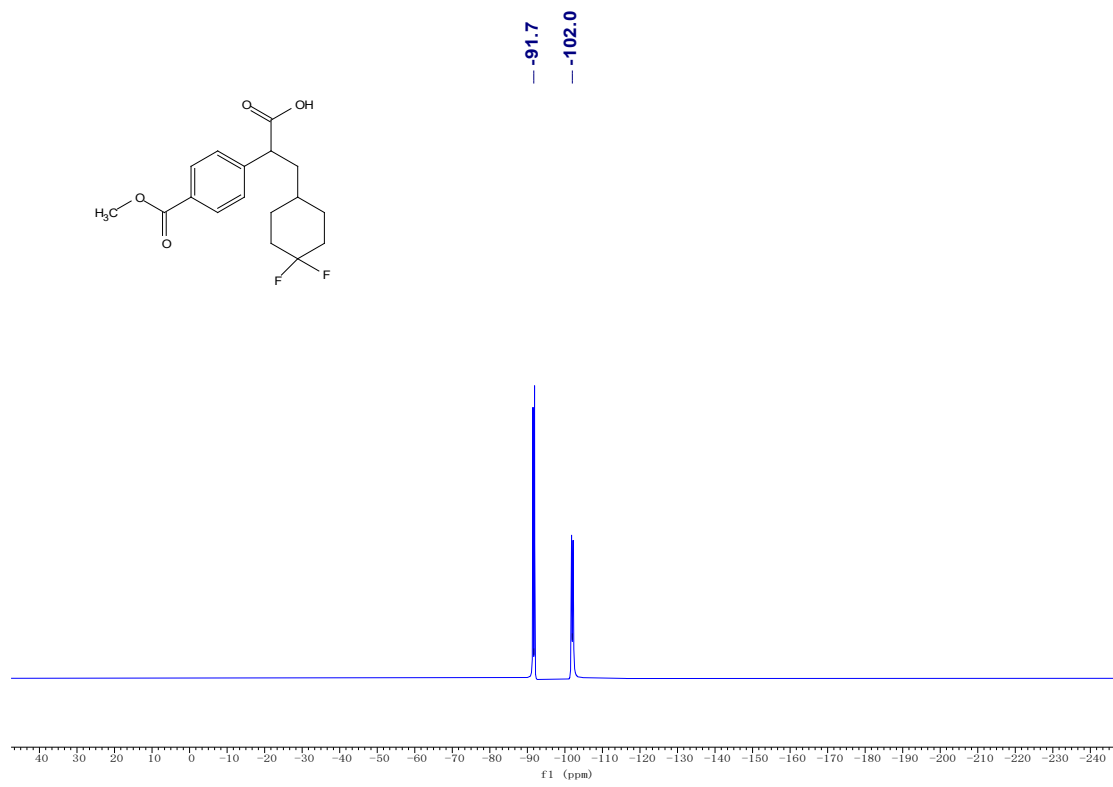



3n

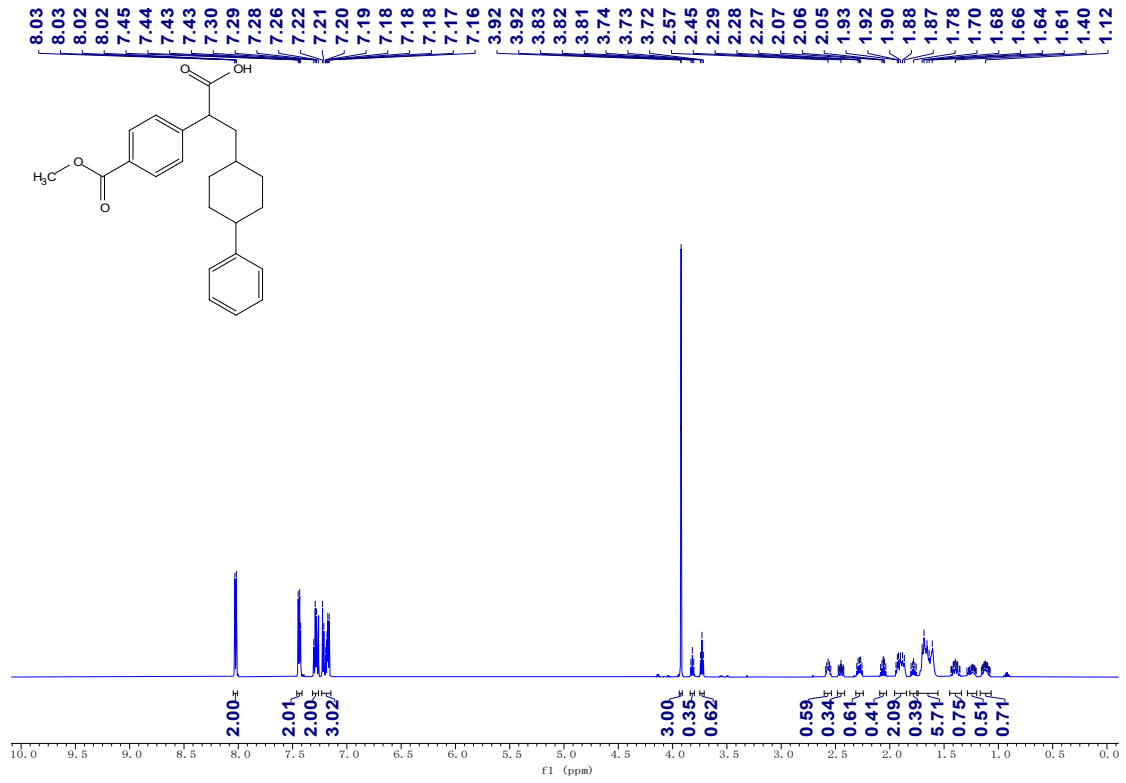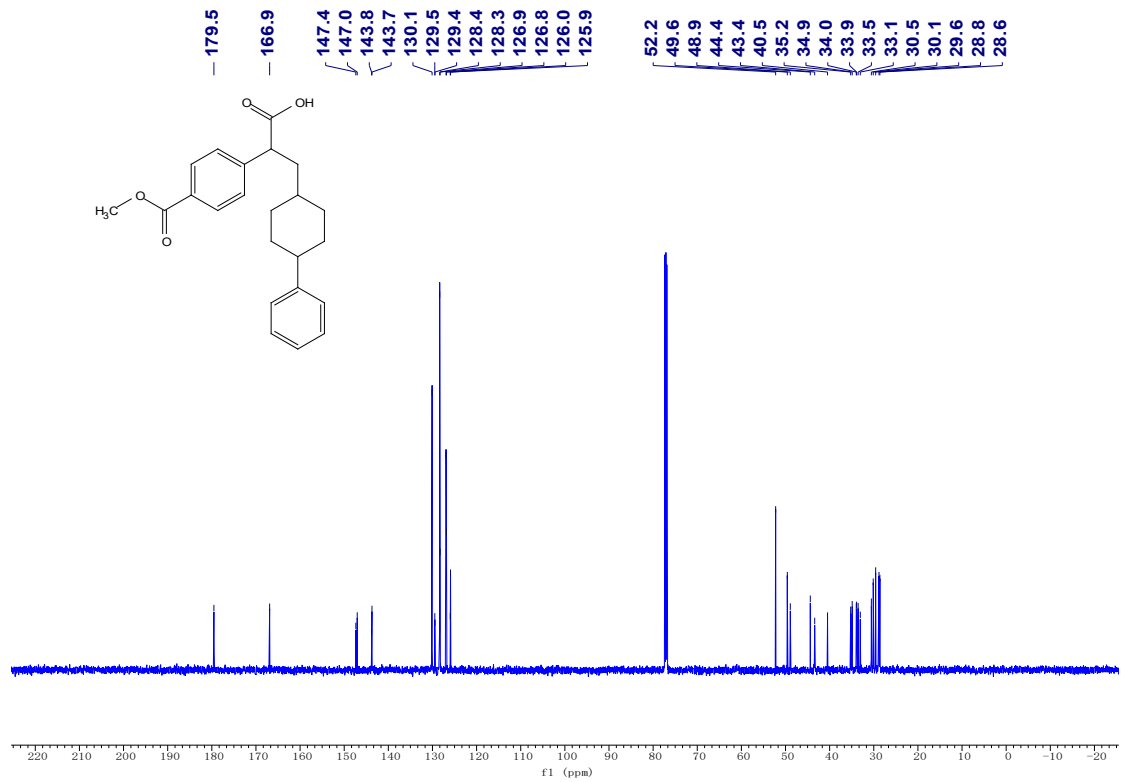

30

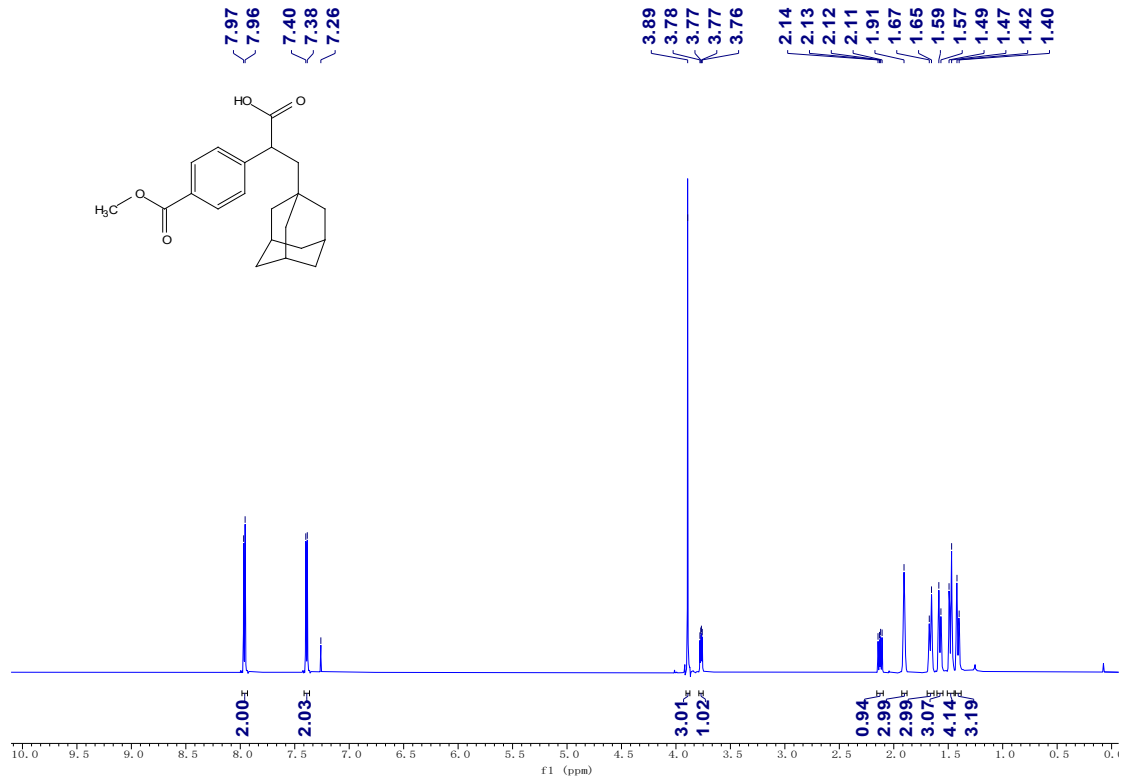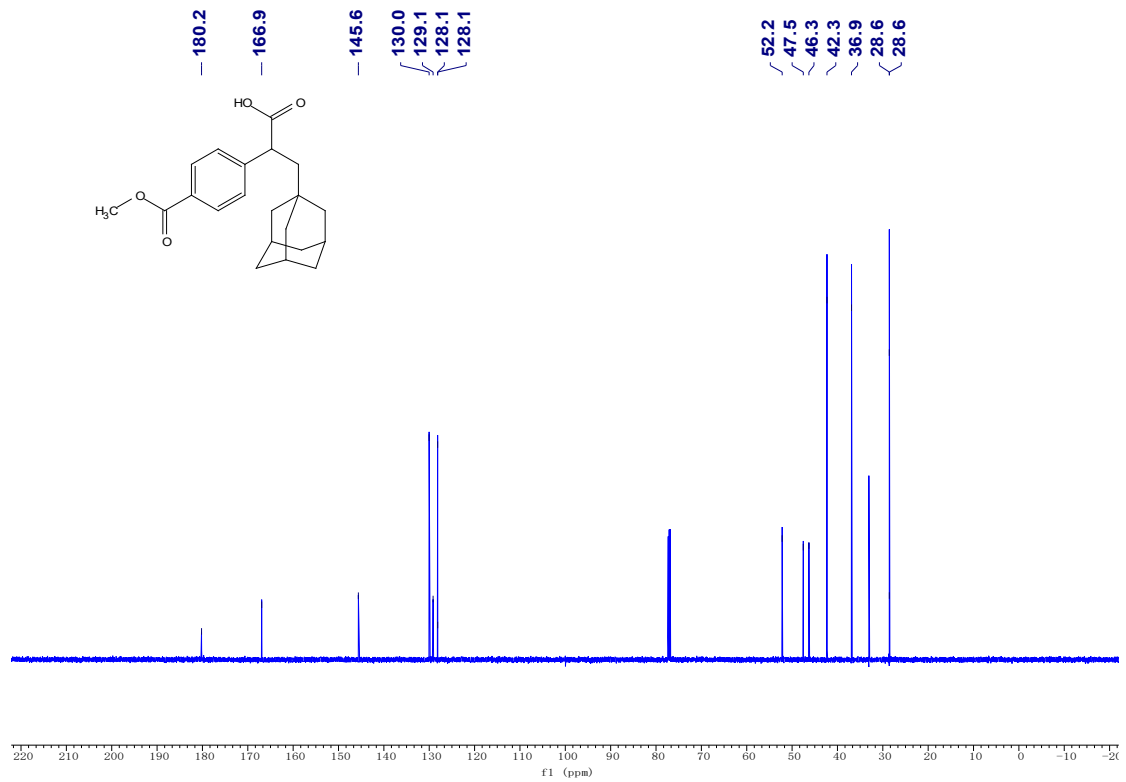

### 3p

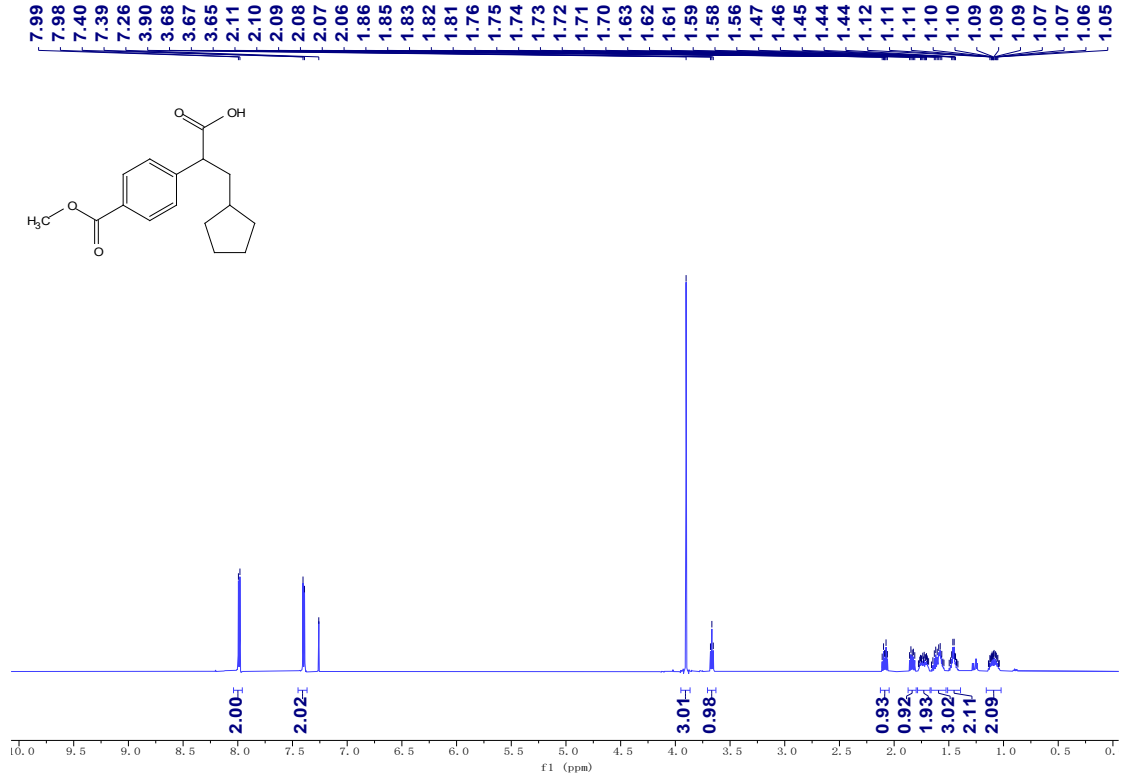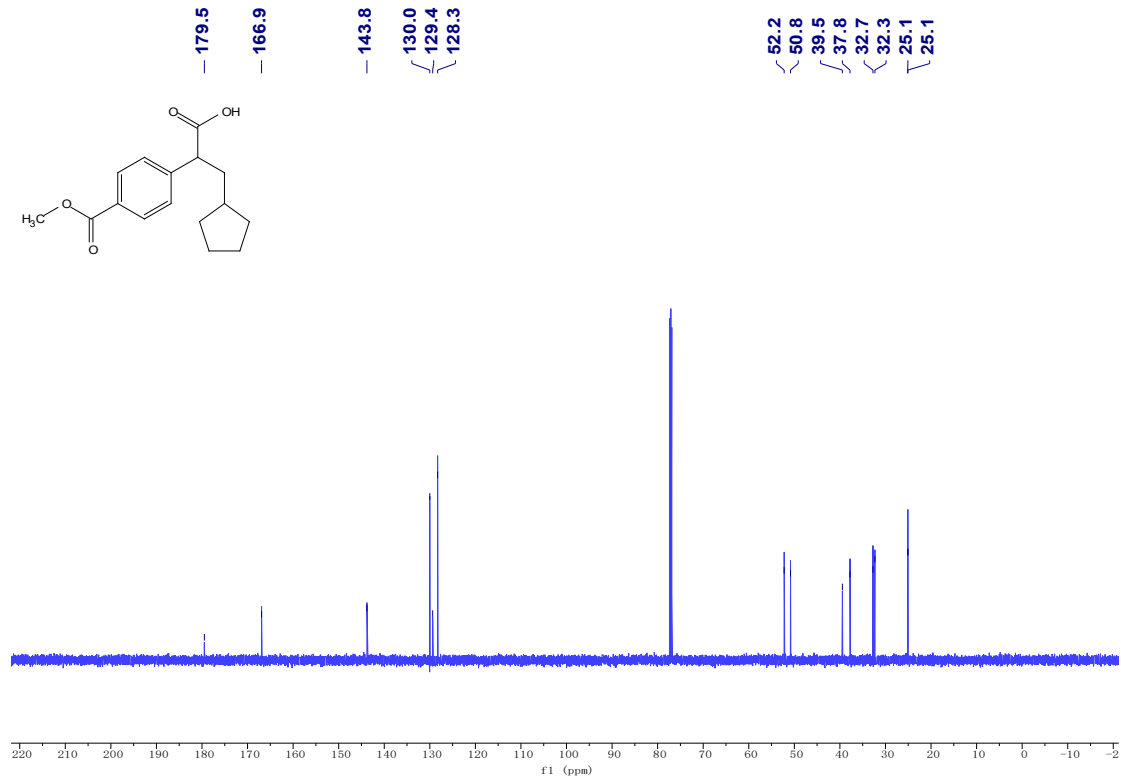

3q

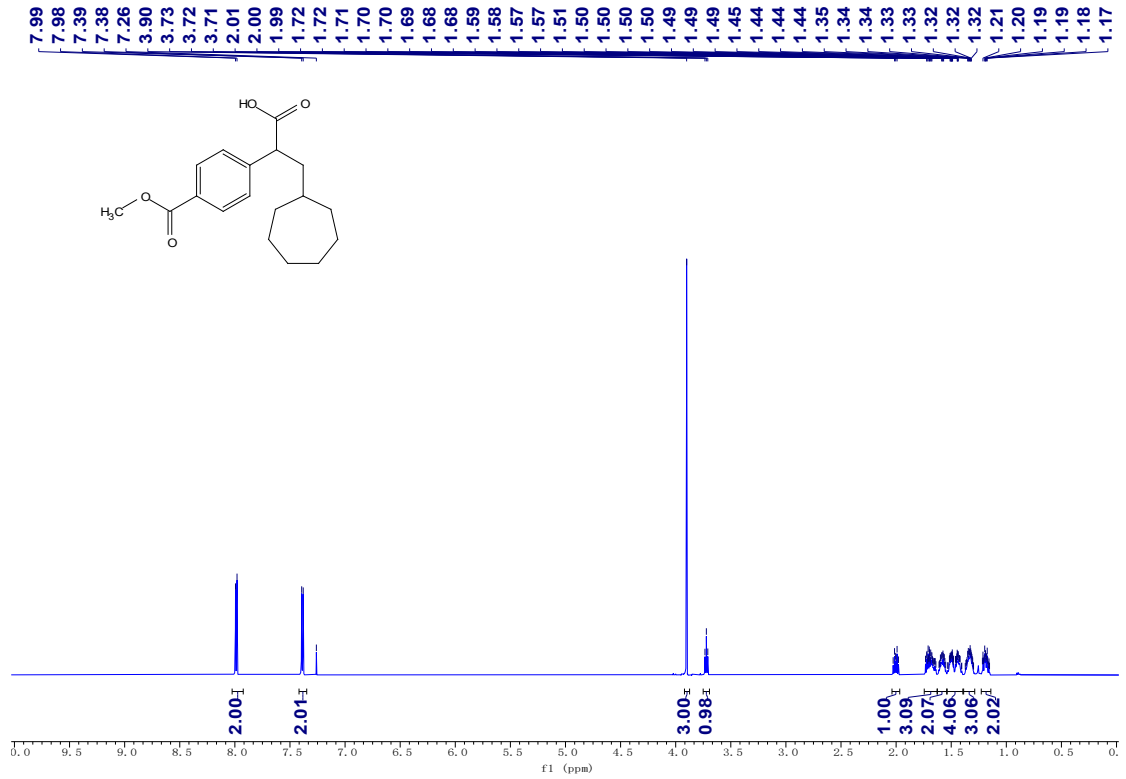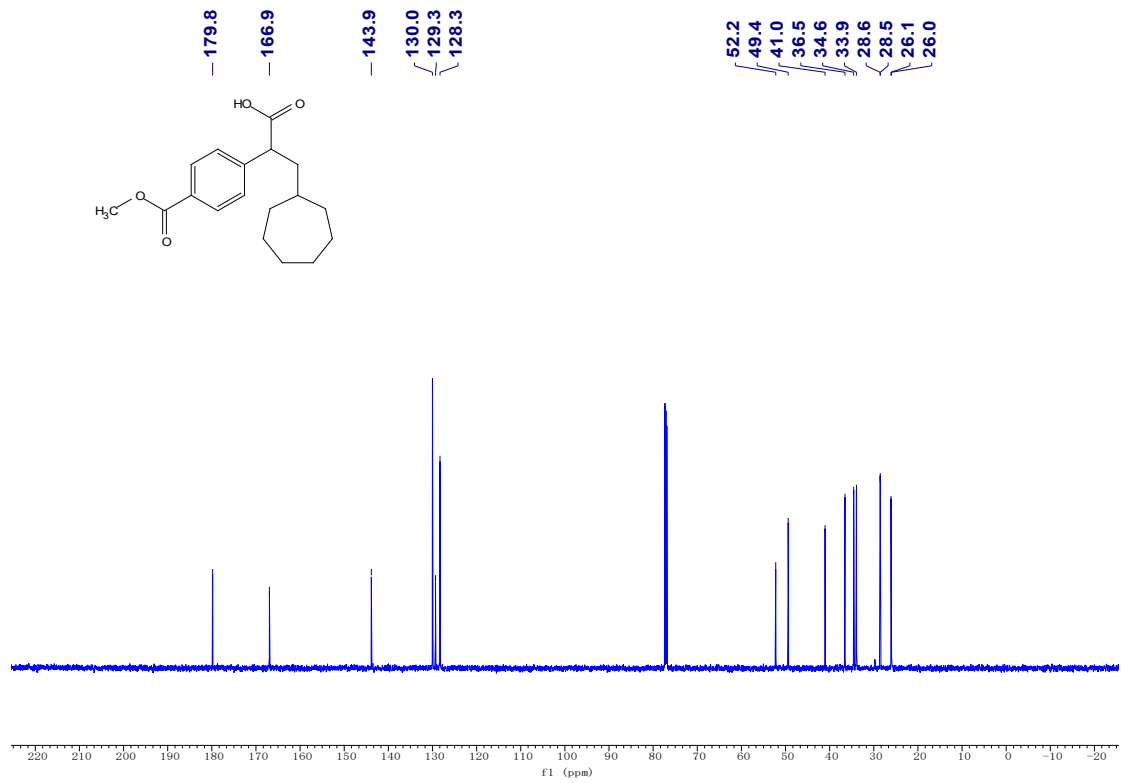

### 3r

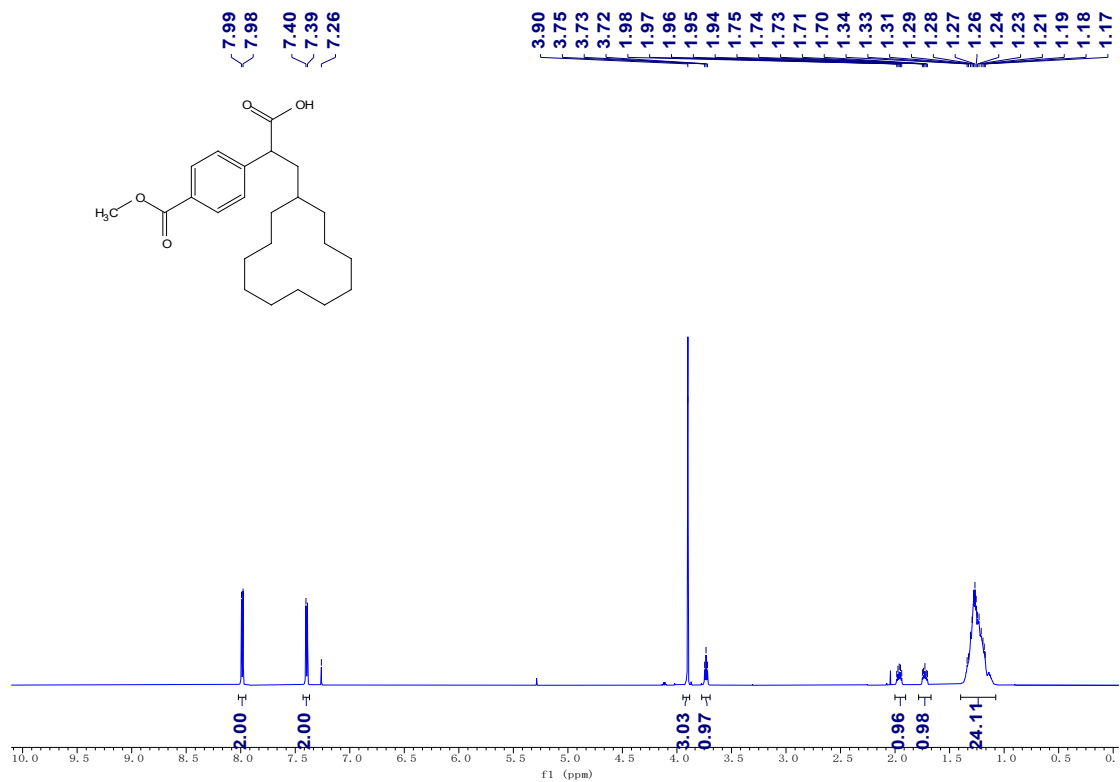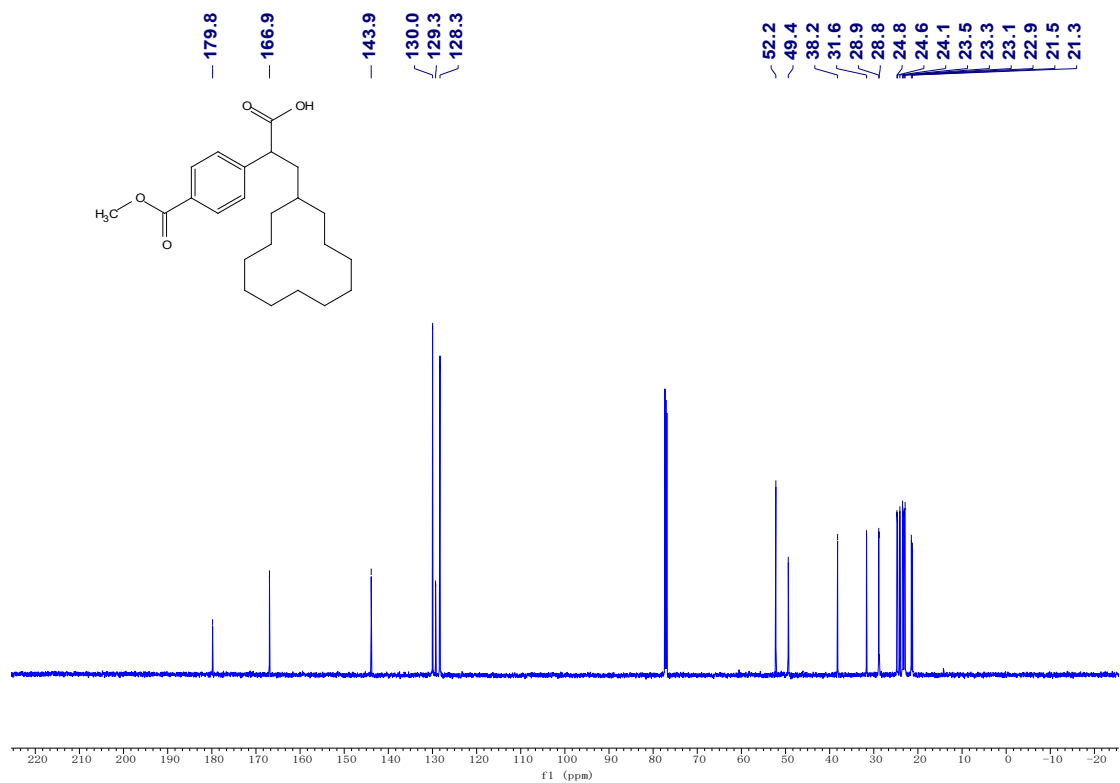

3s

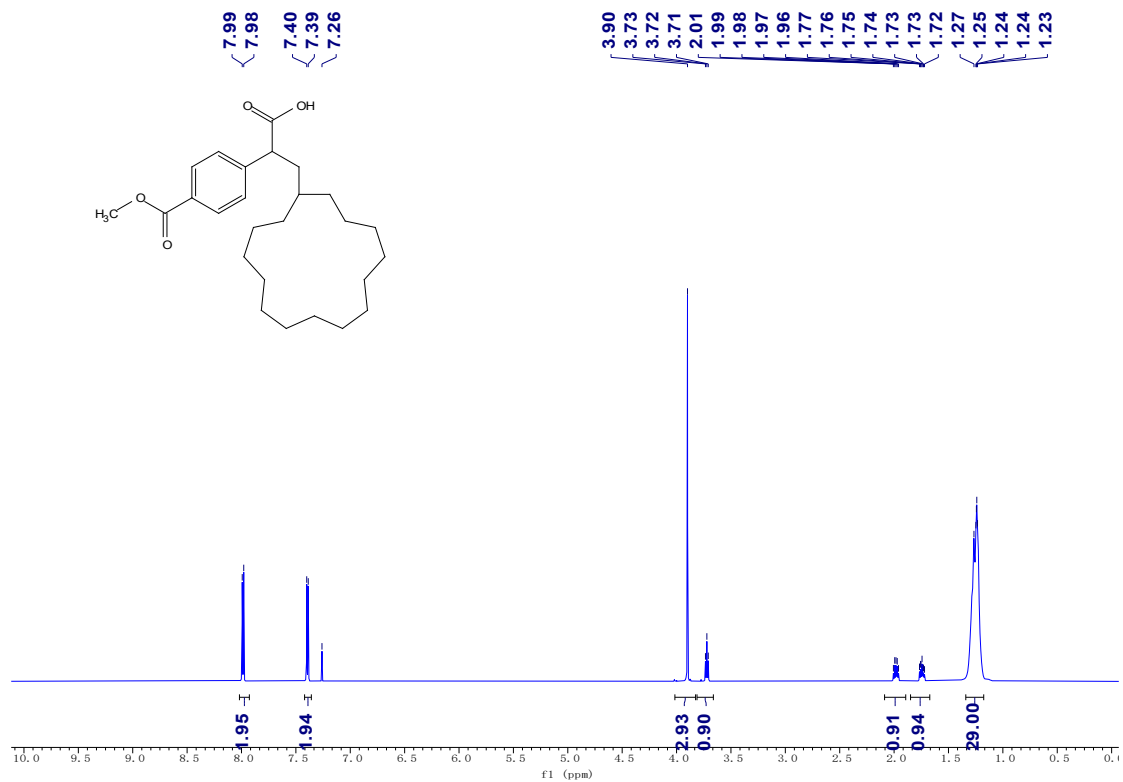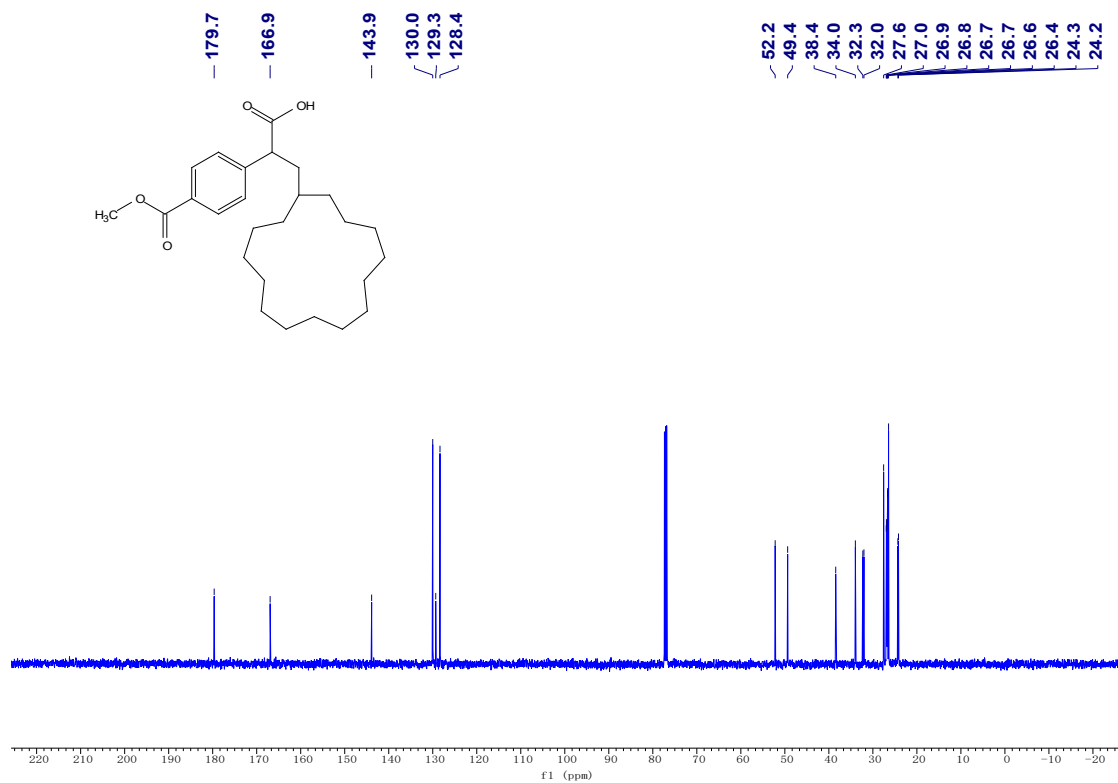

3t

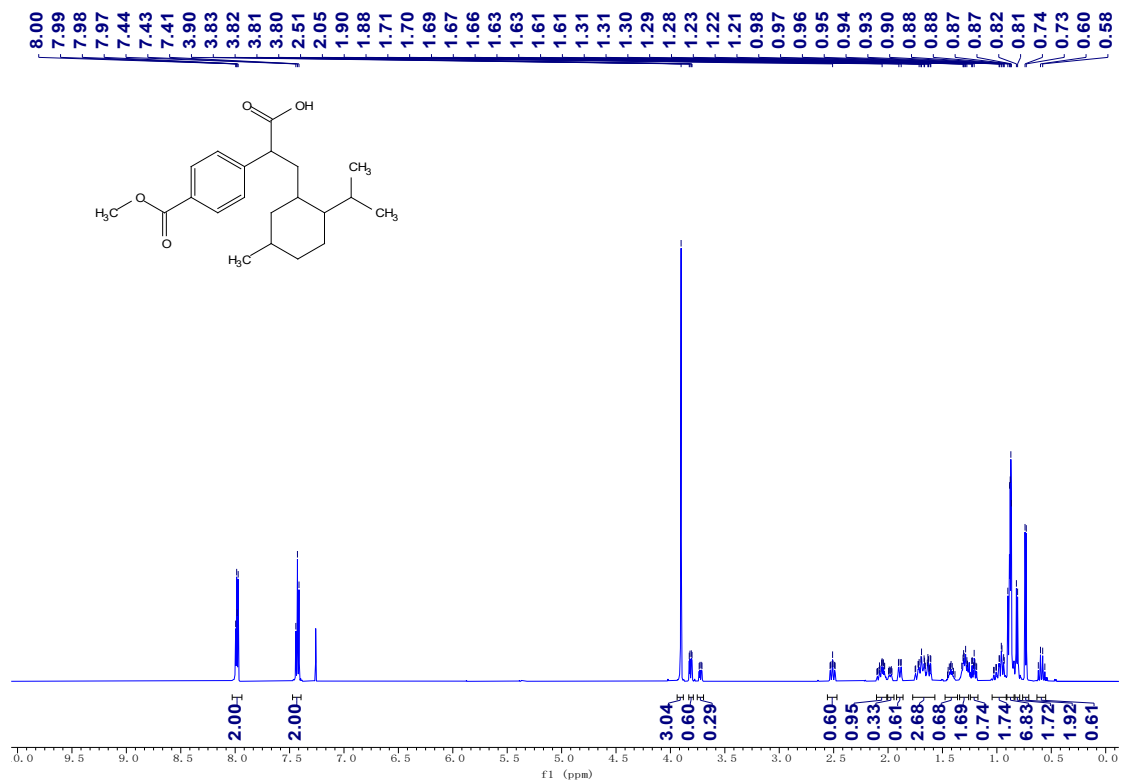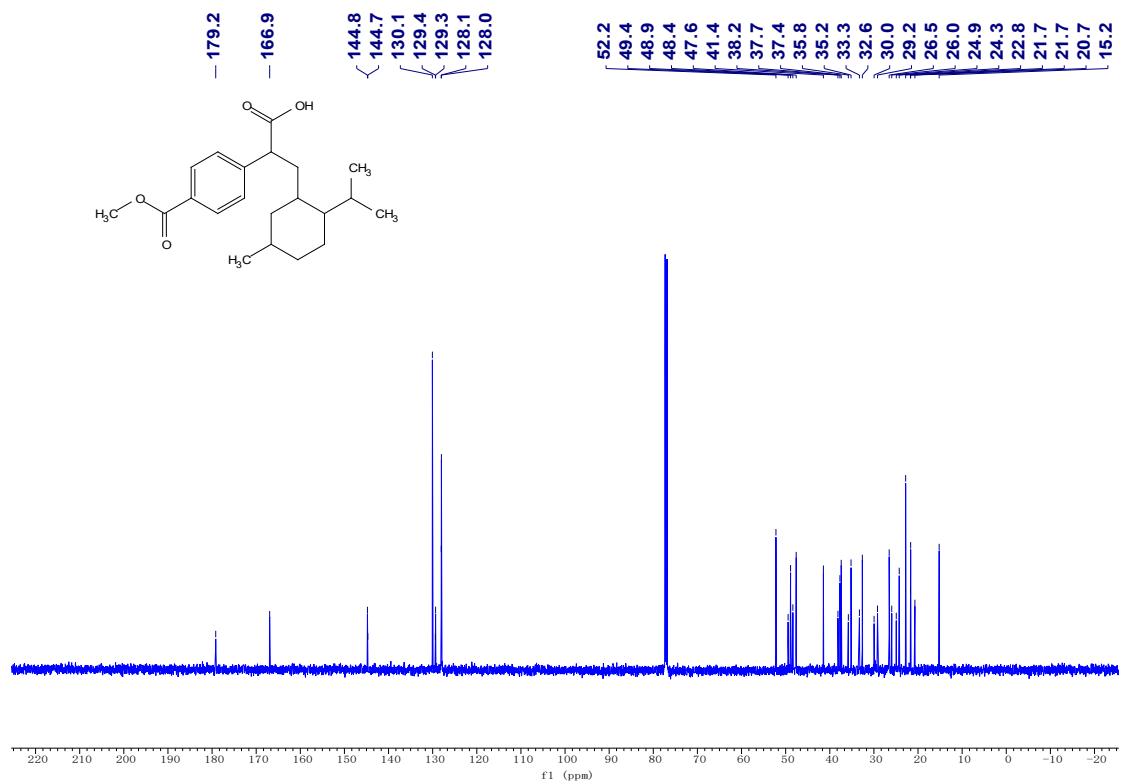

### 3u

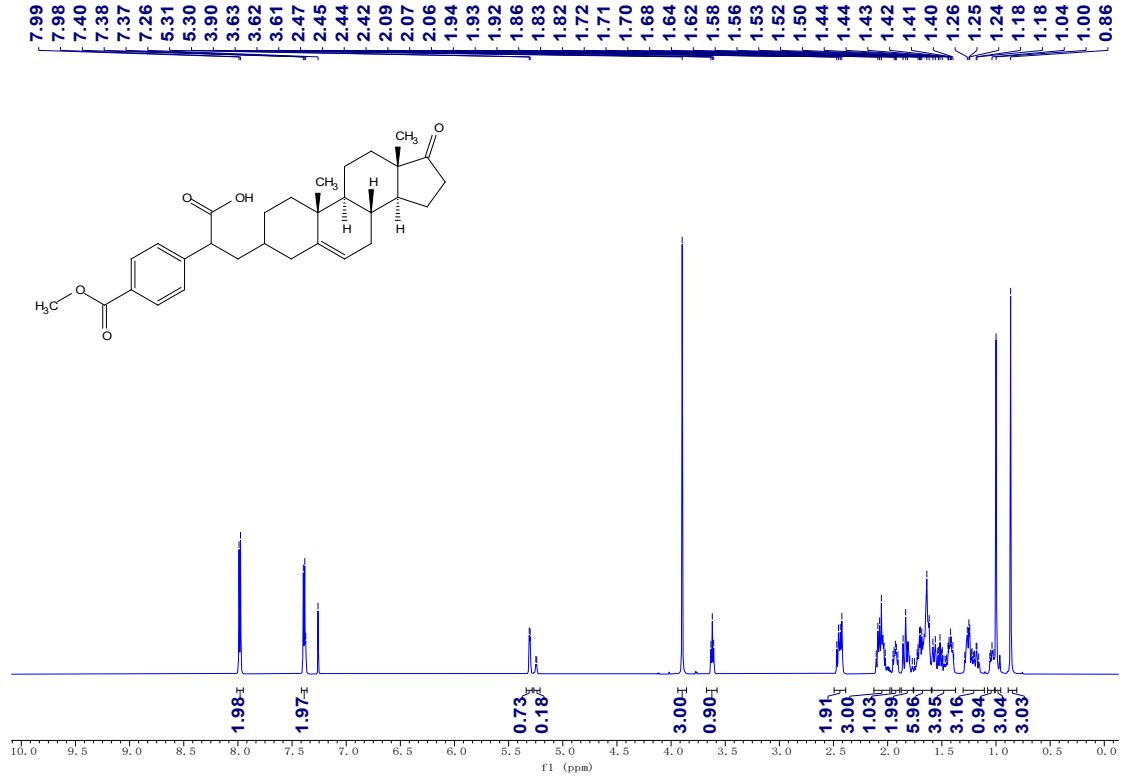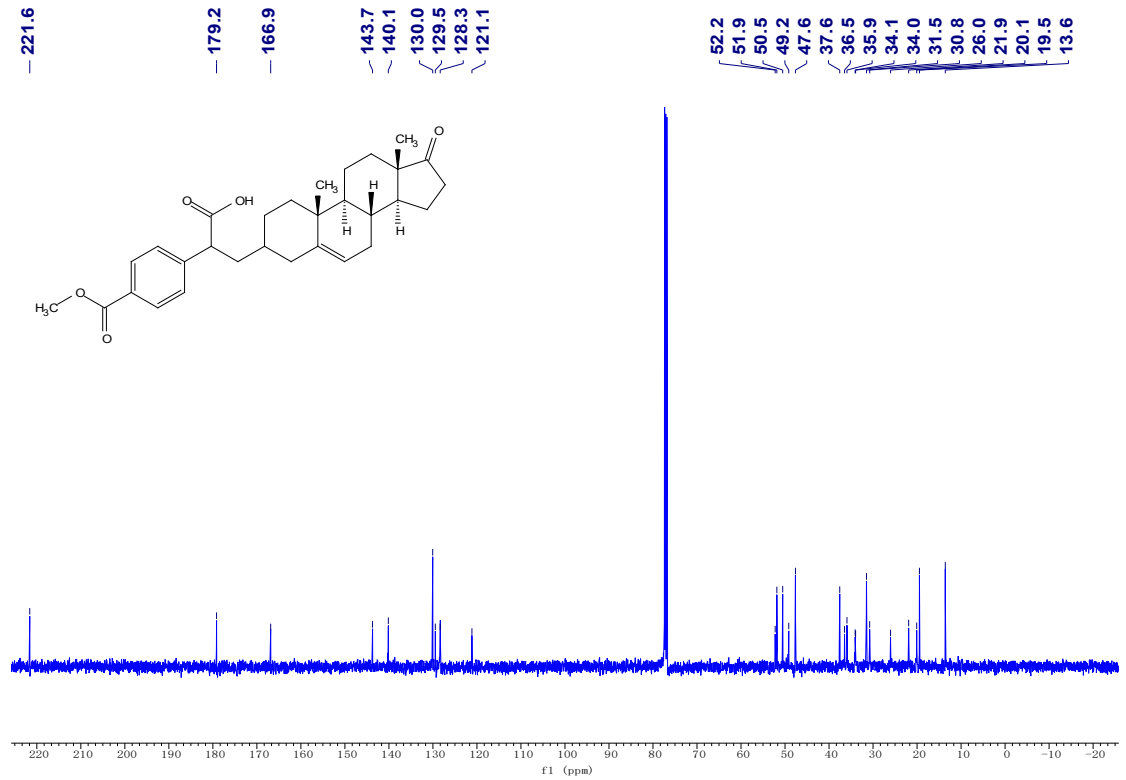



### 3v

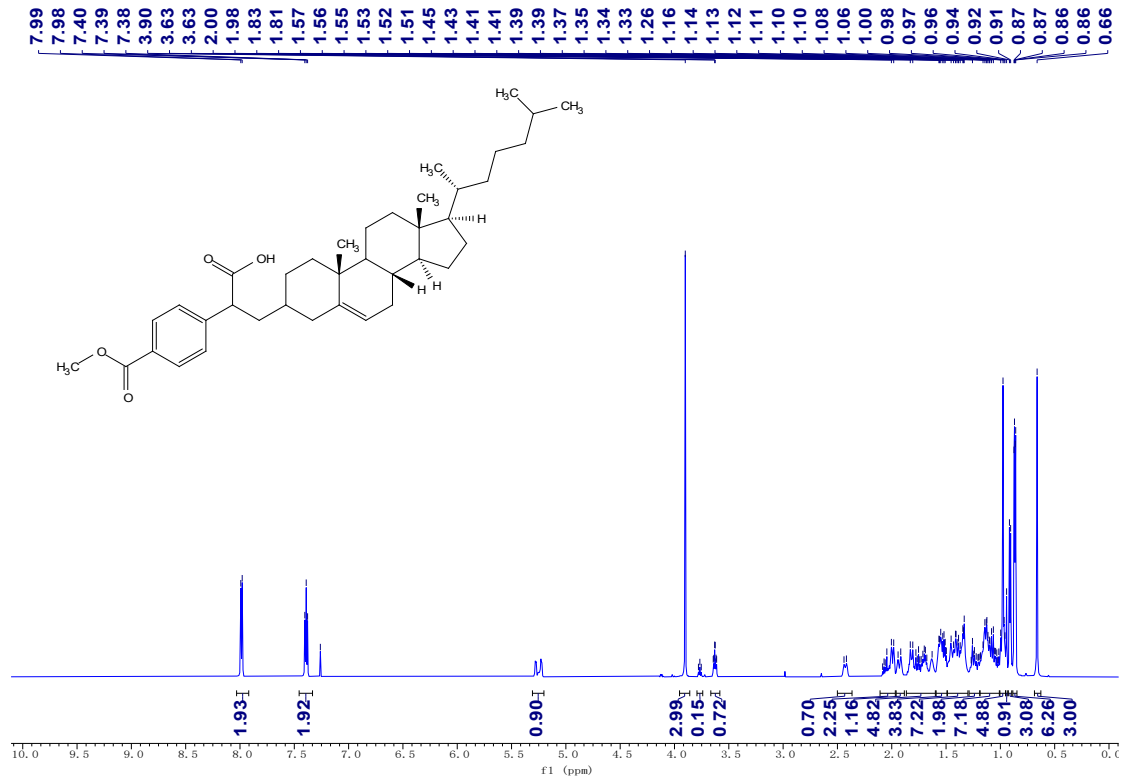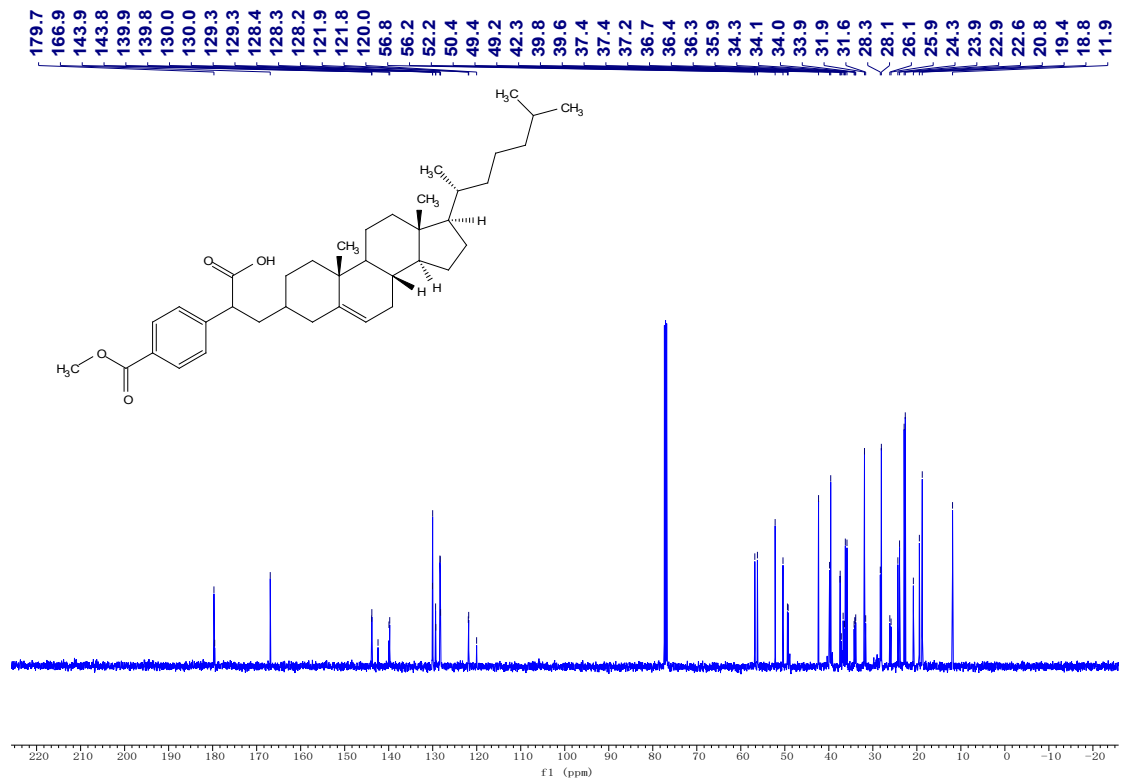

### 3w

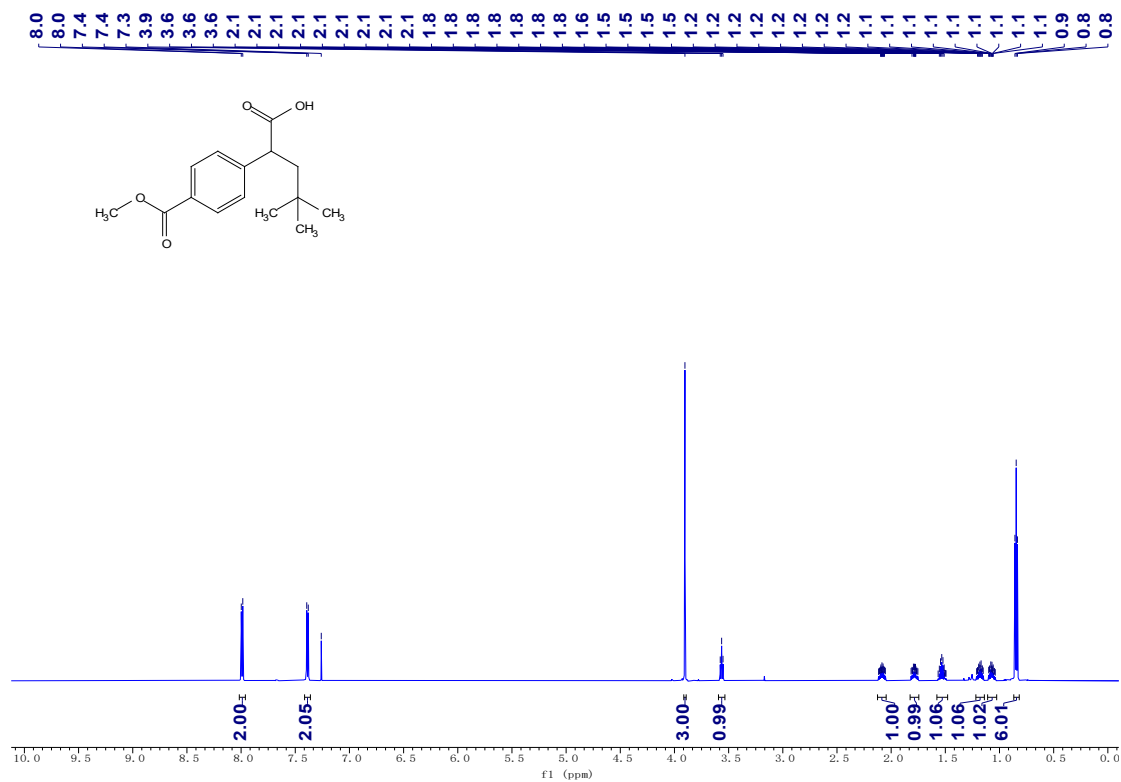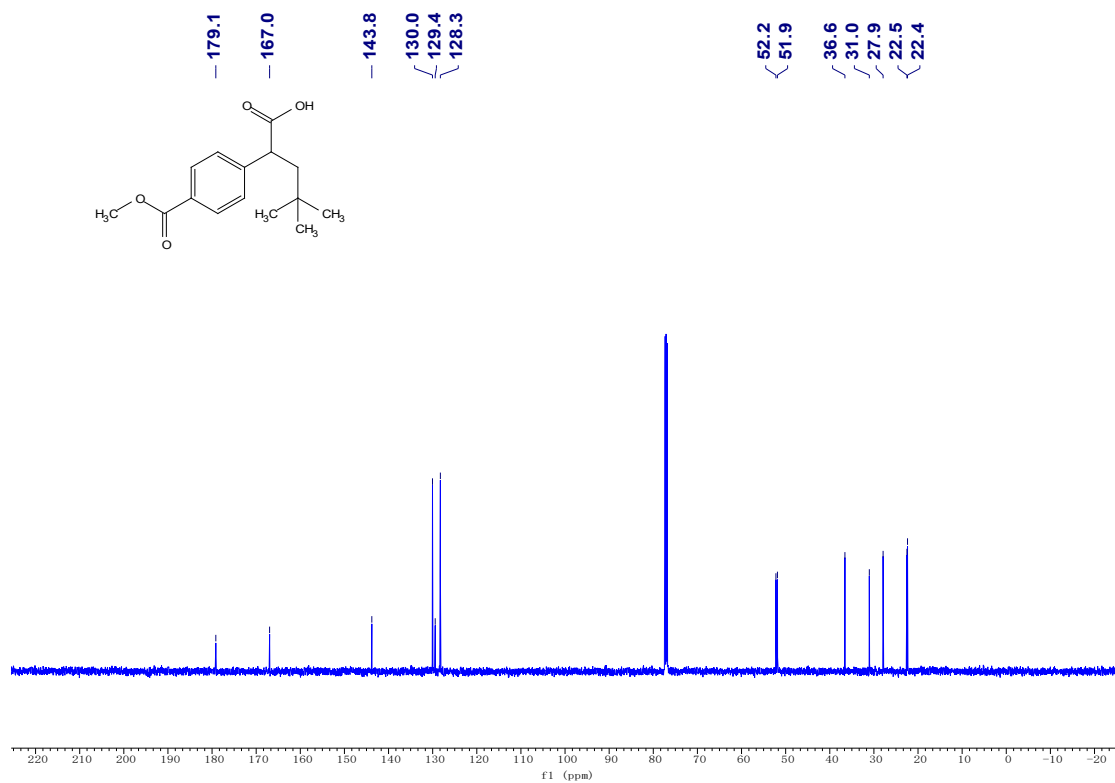

3x

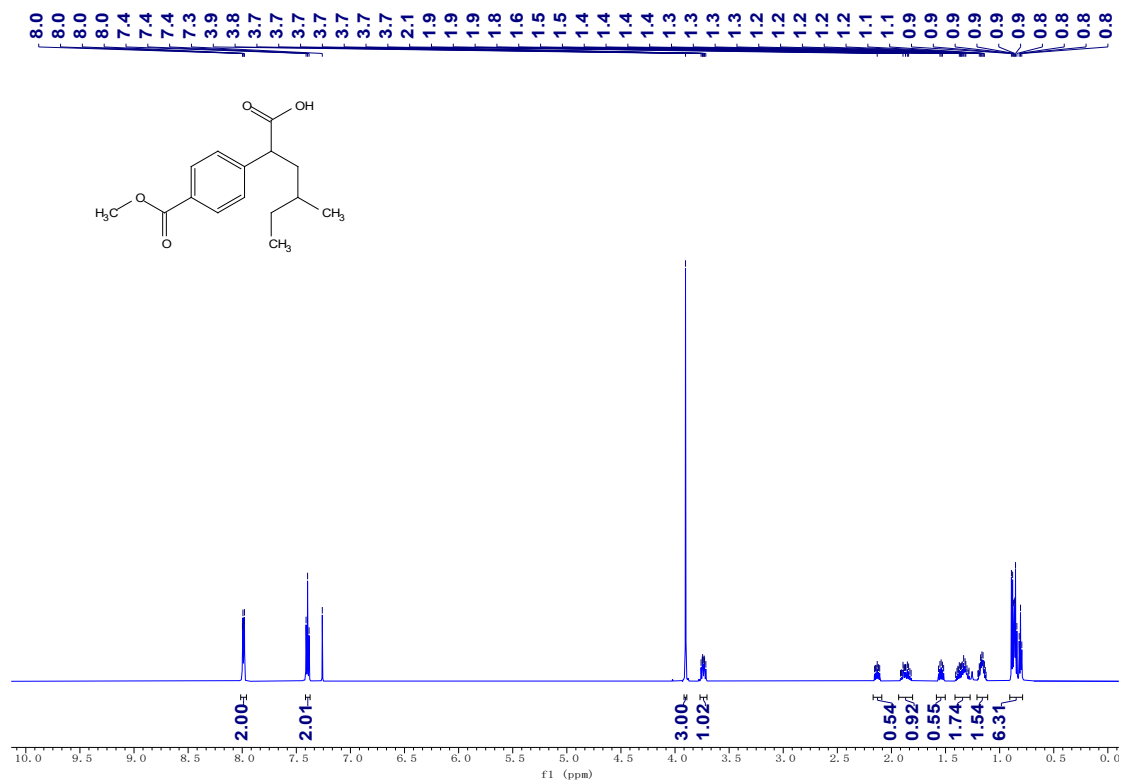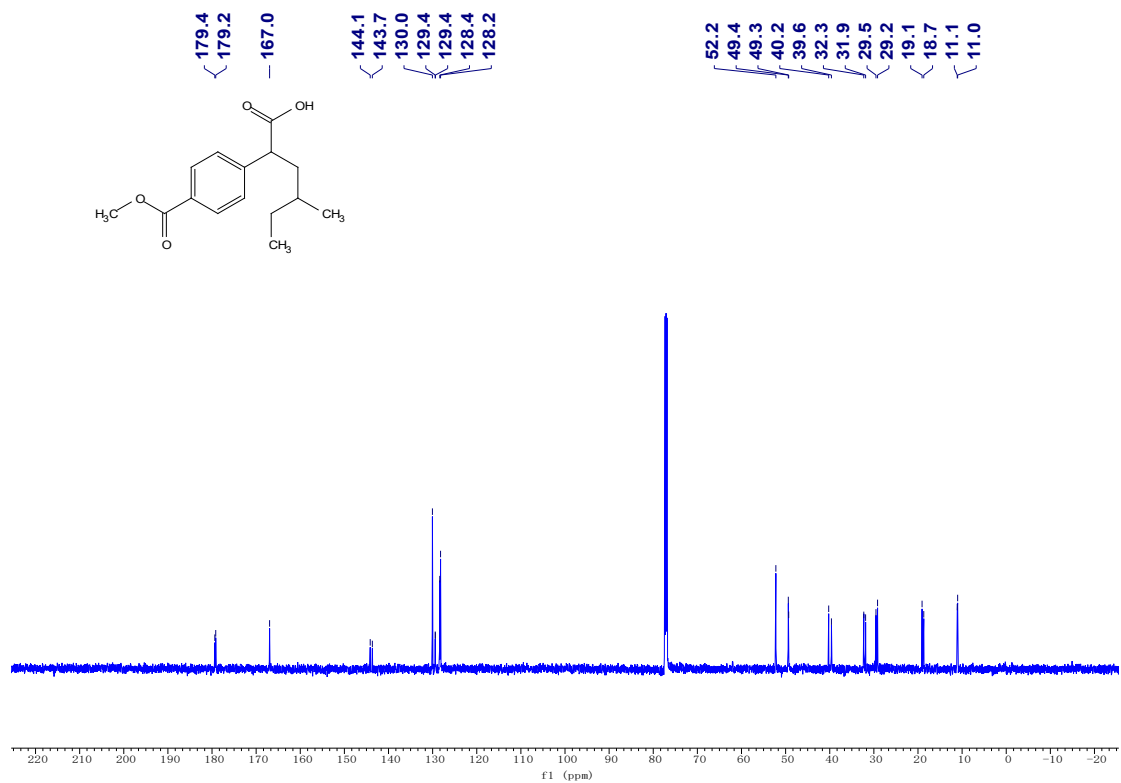

4a

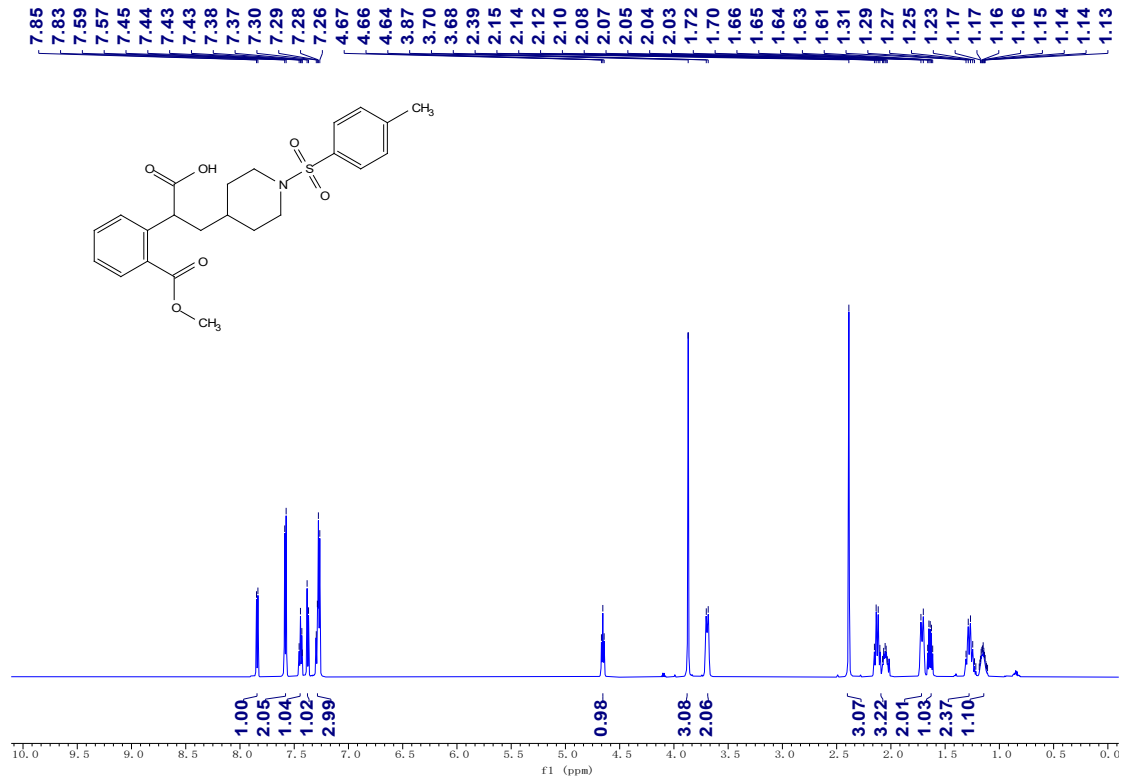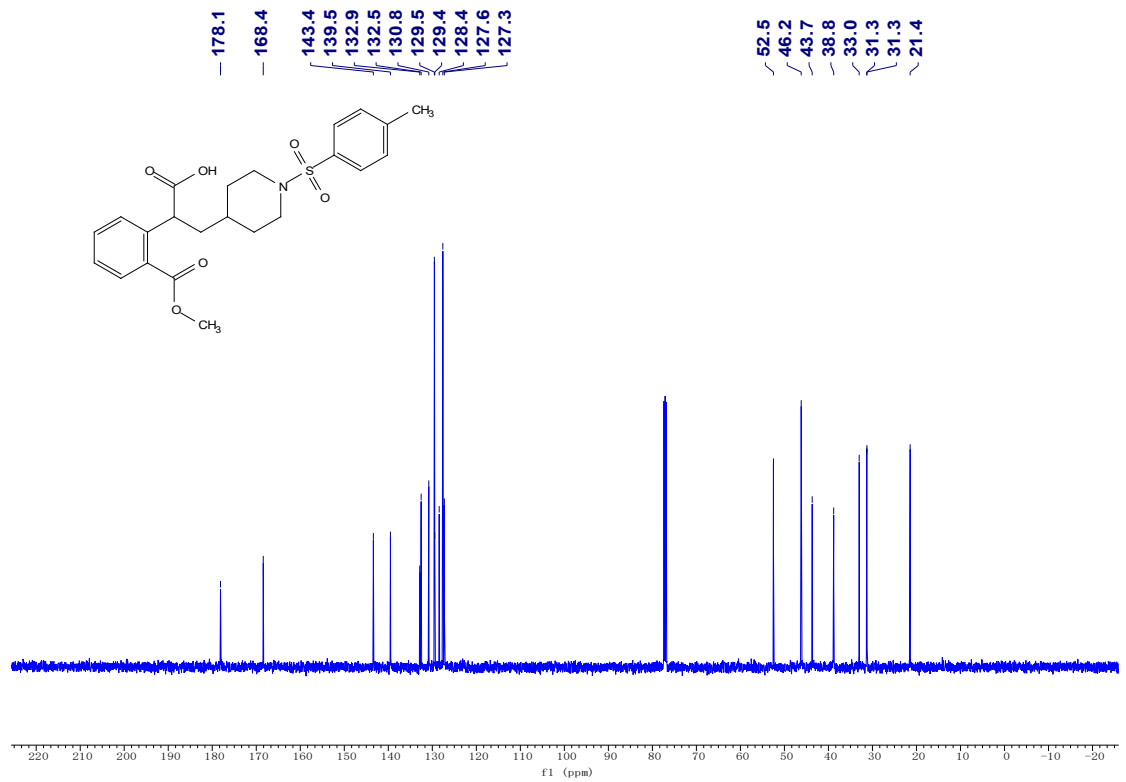

4b

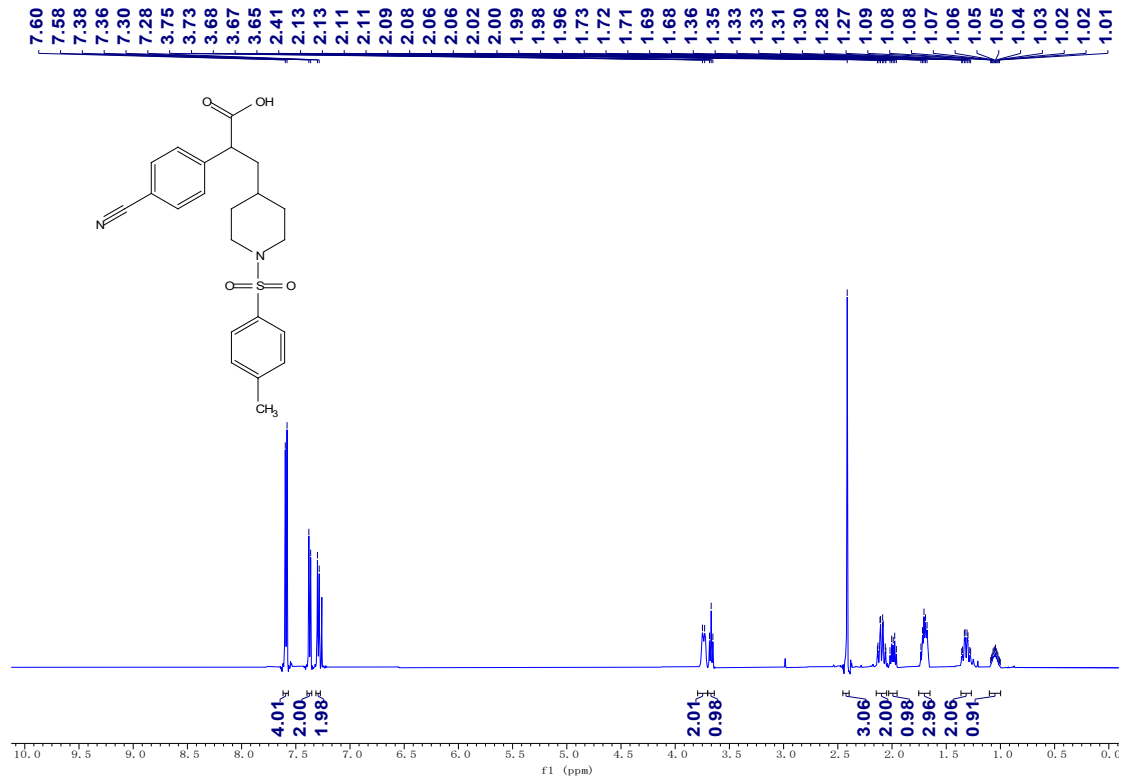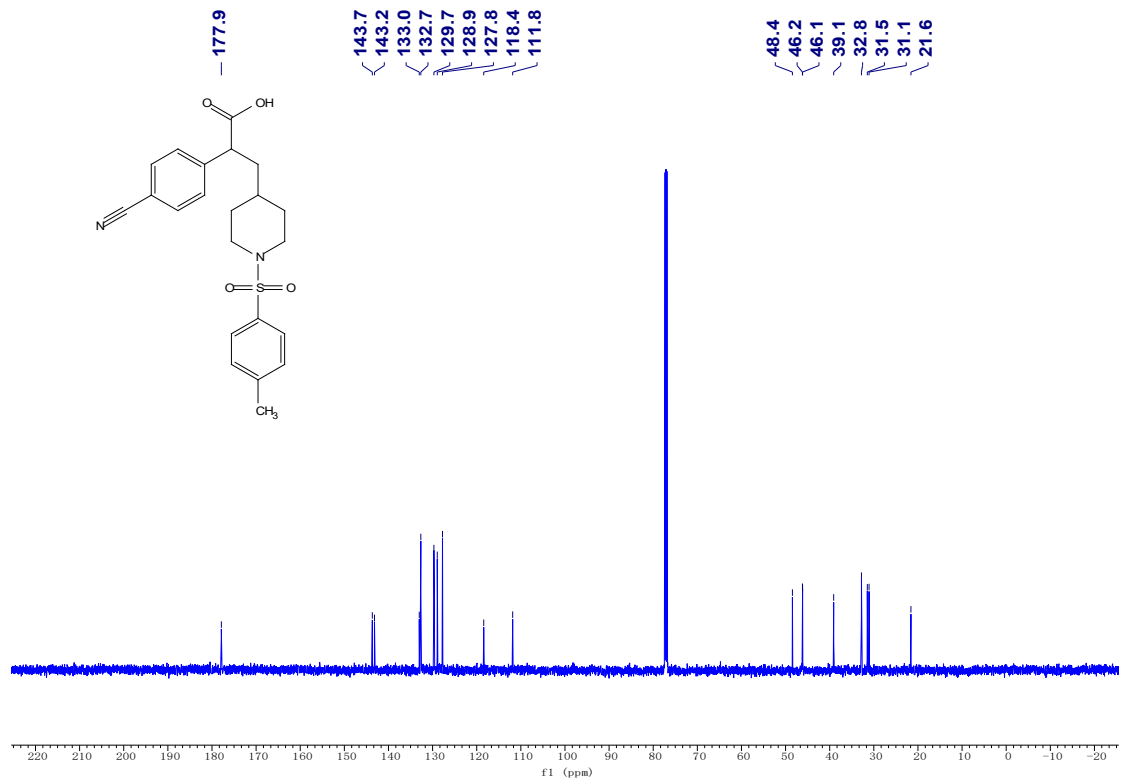

4c

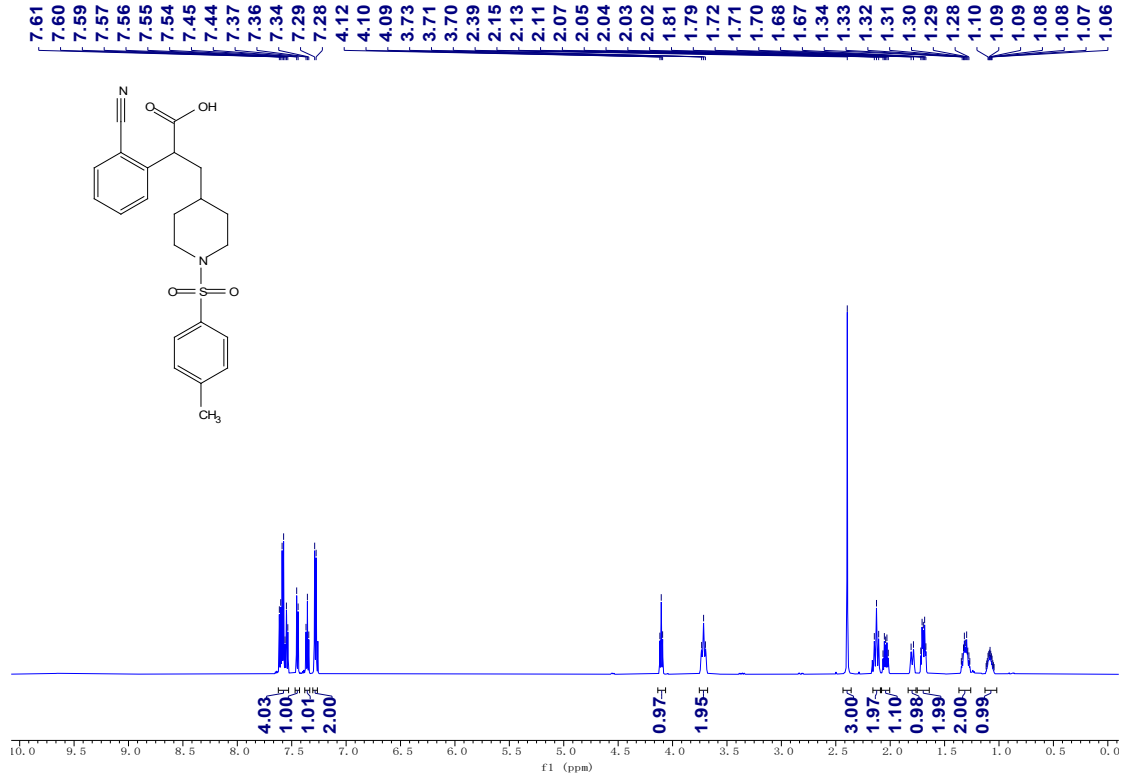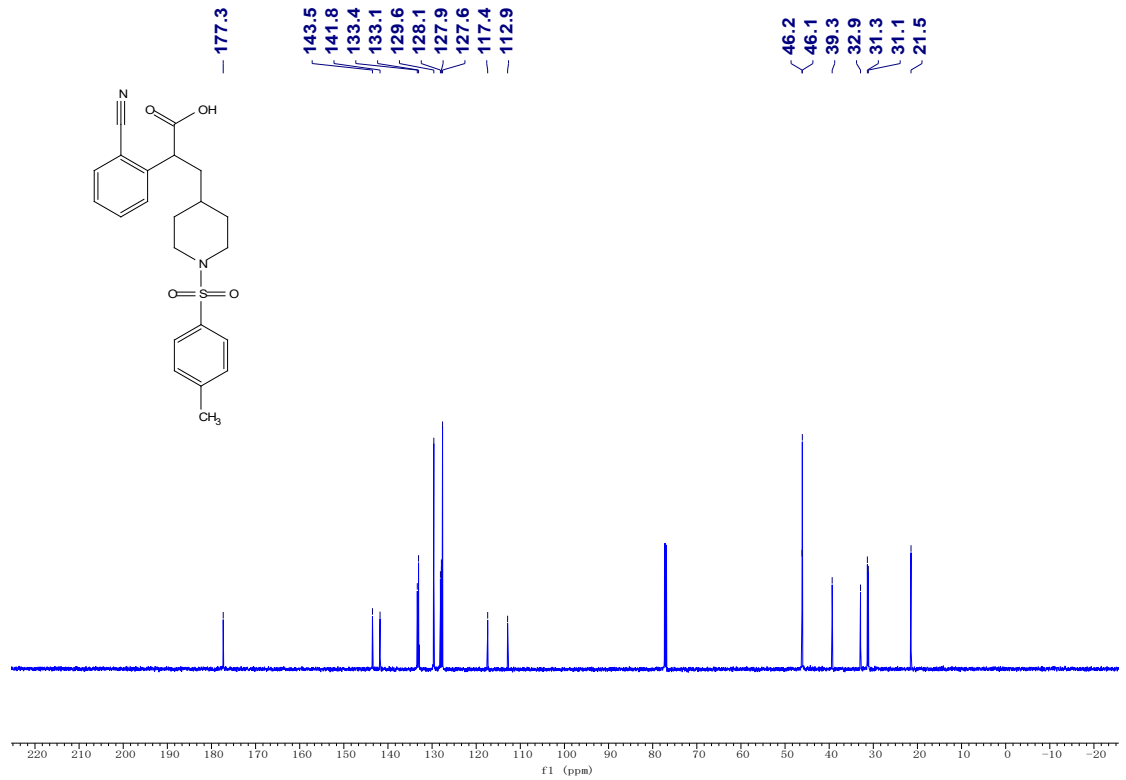

### 4d

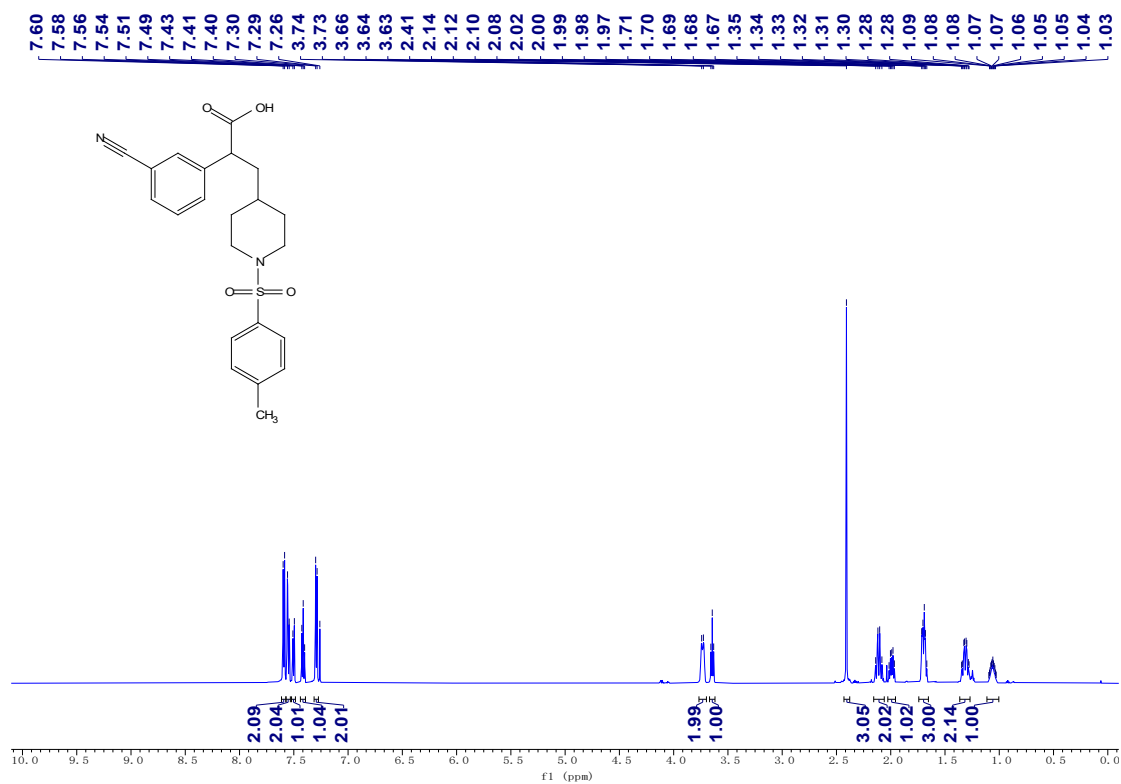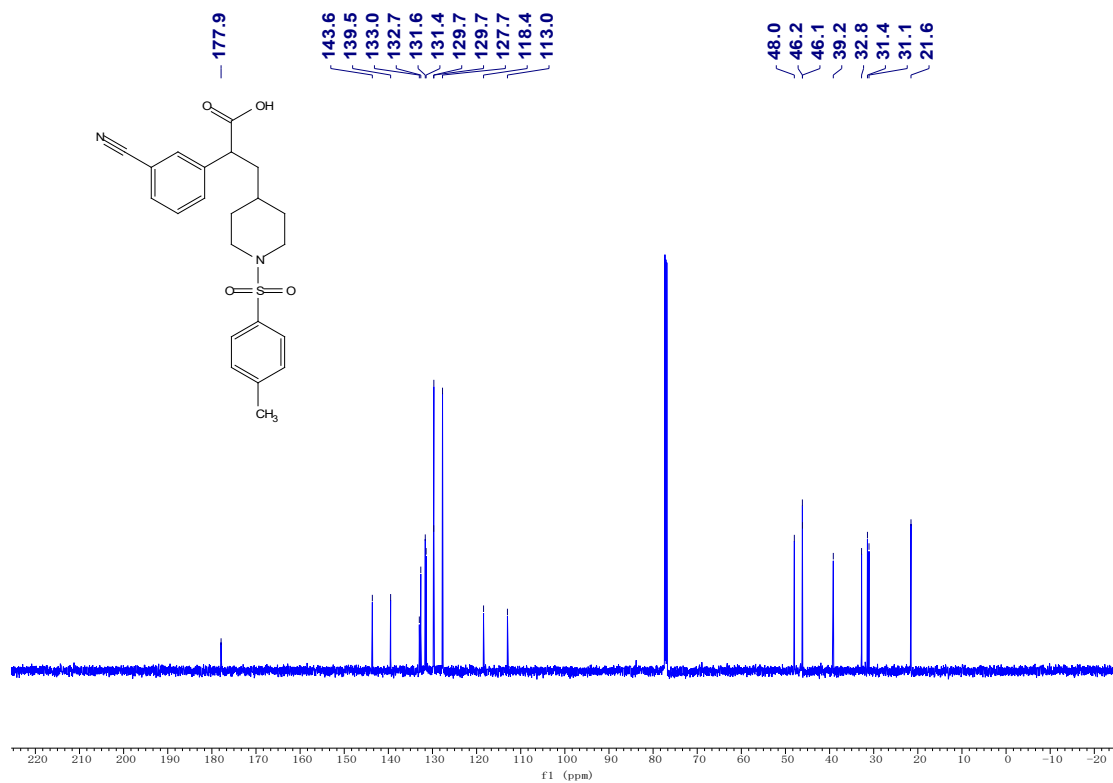

4e

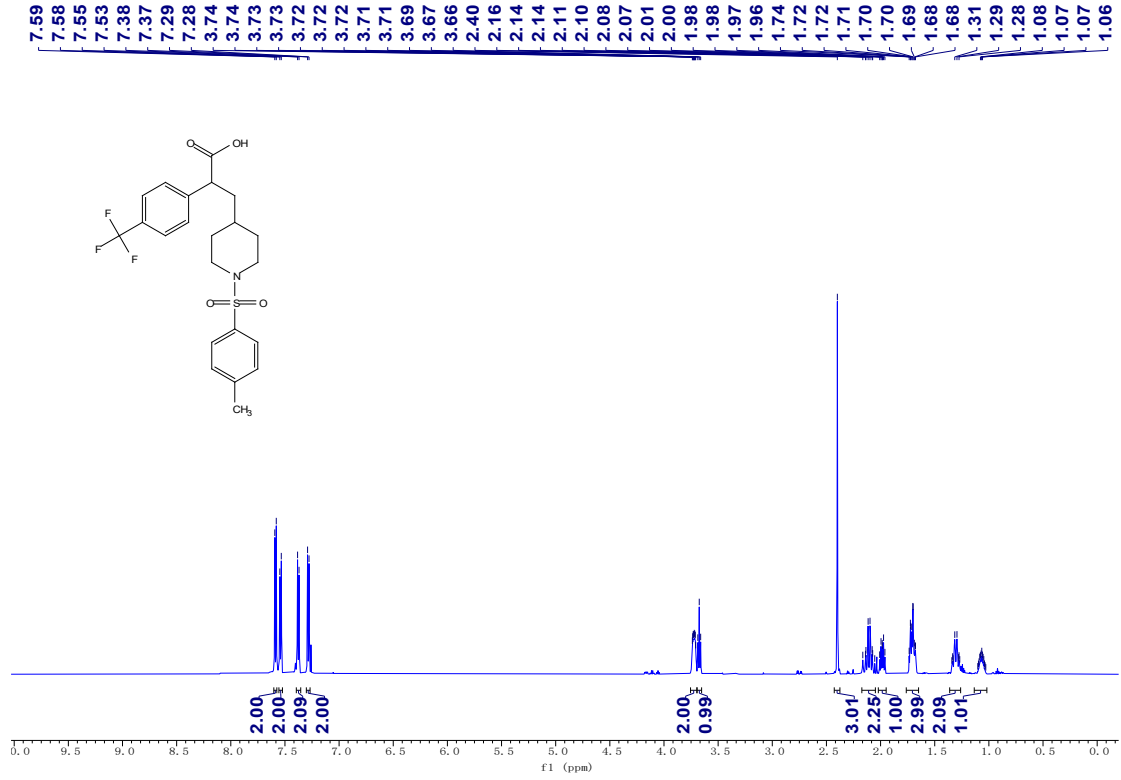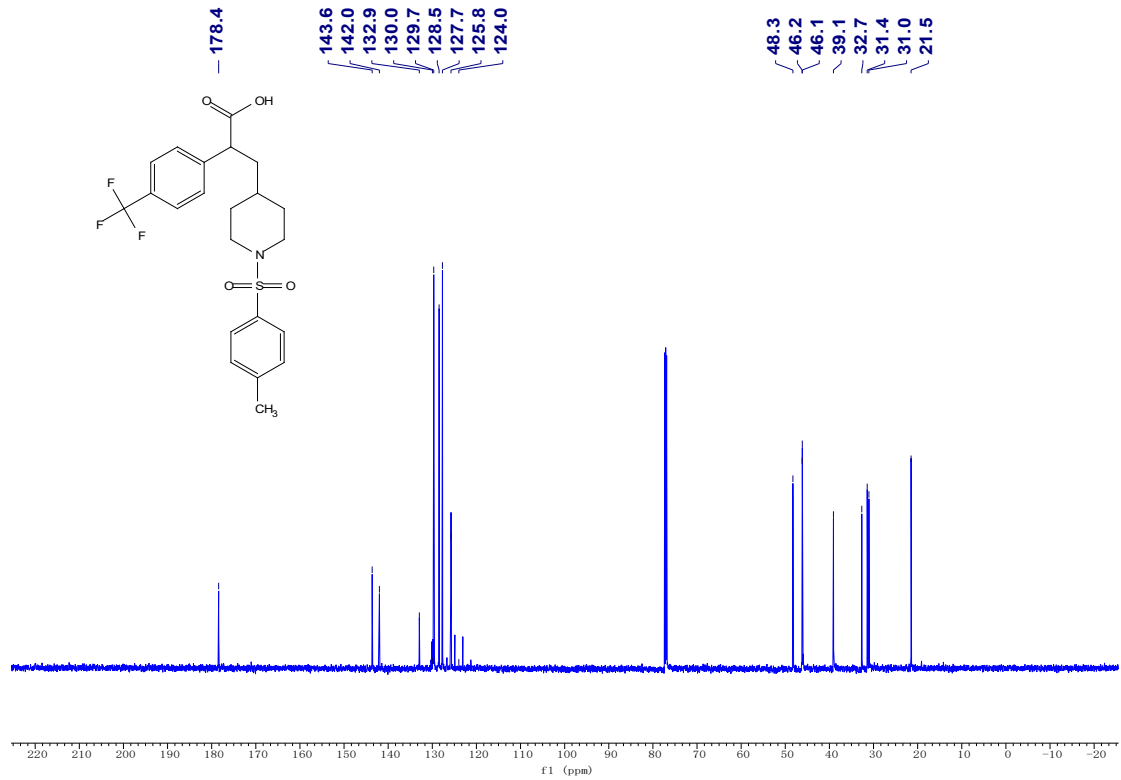



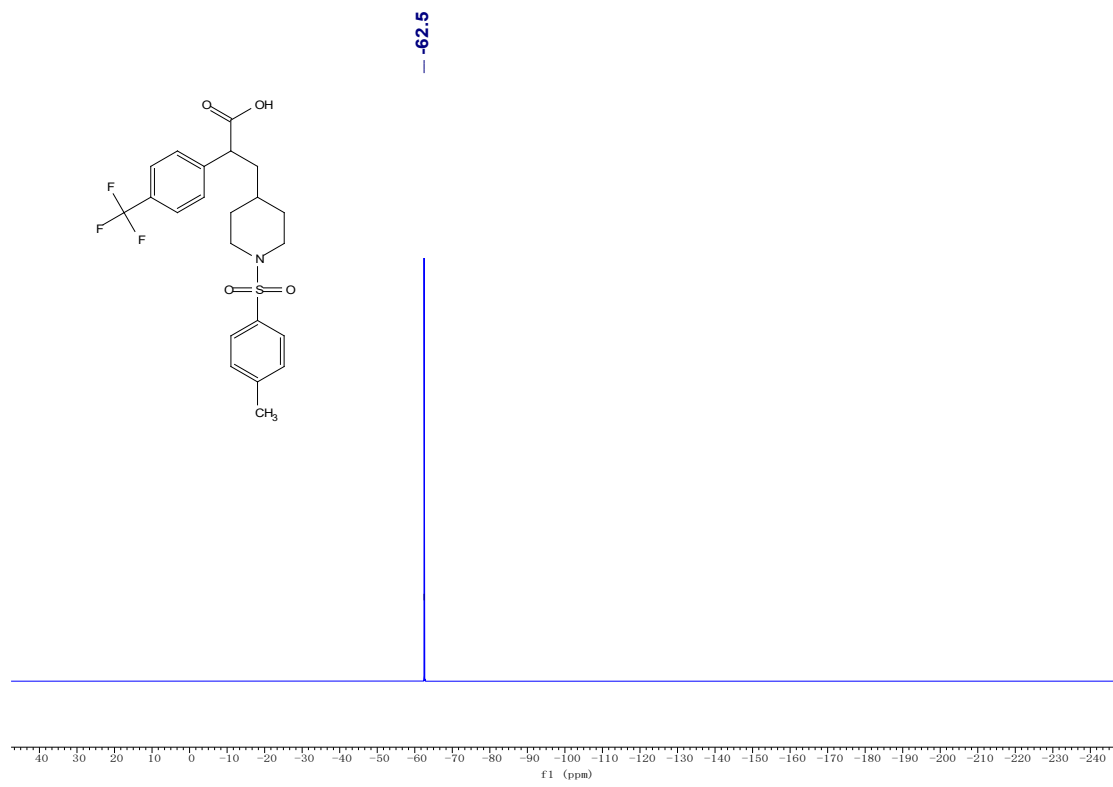

### 4f

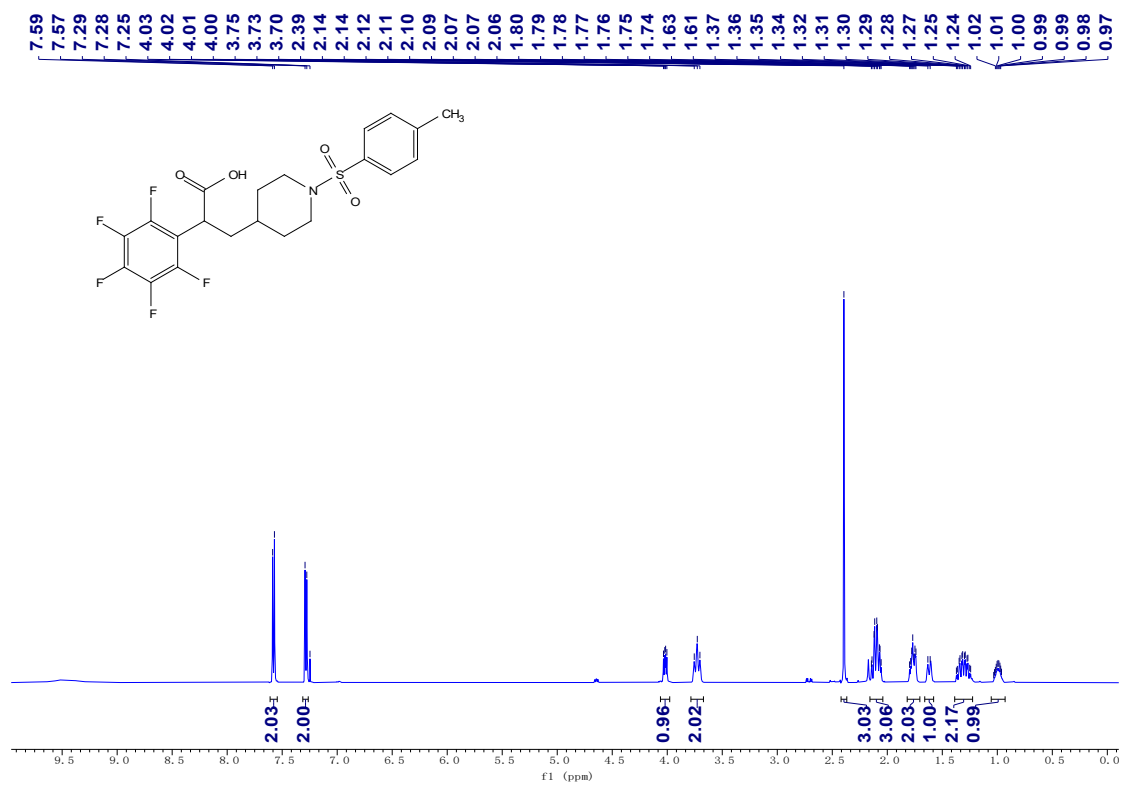

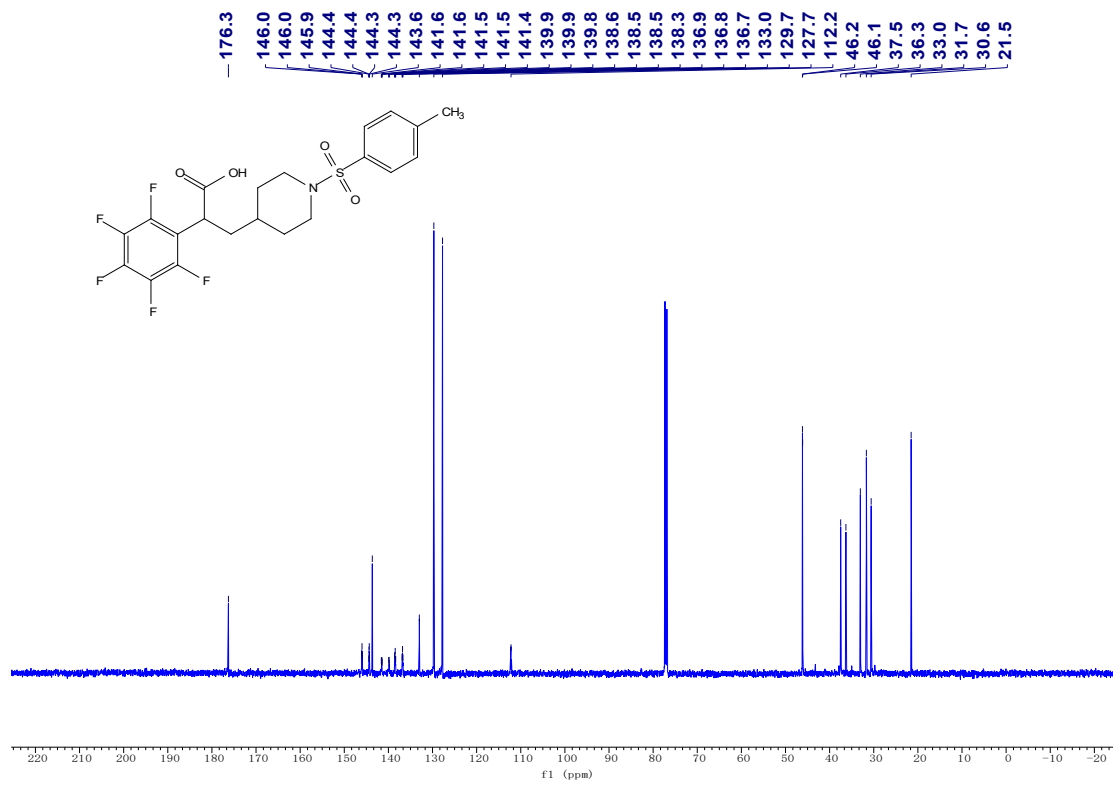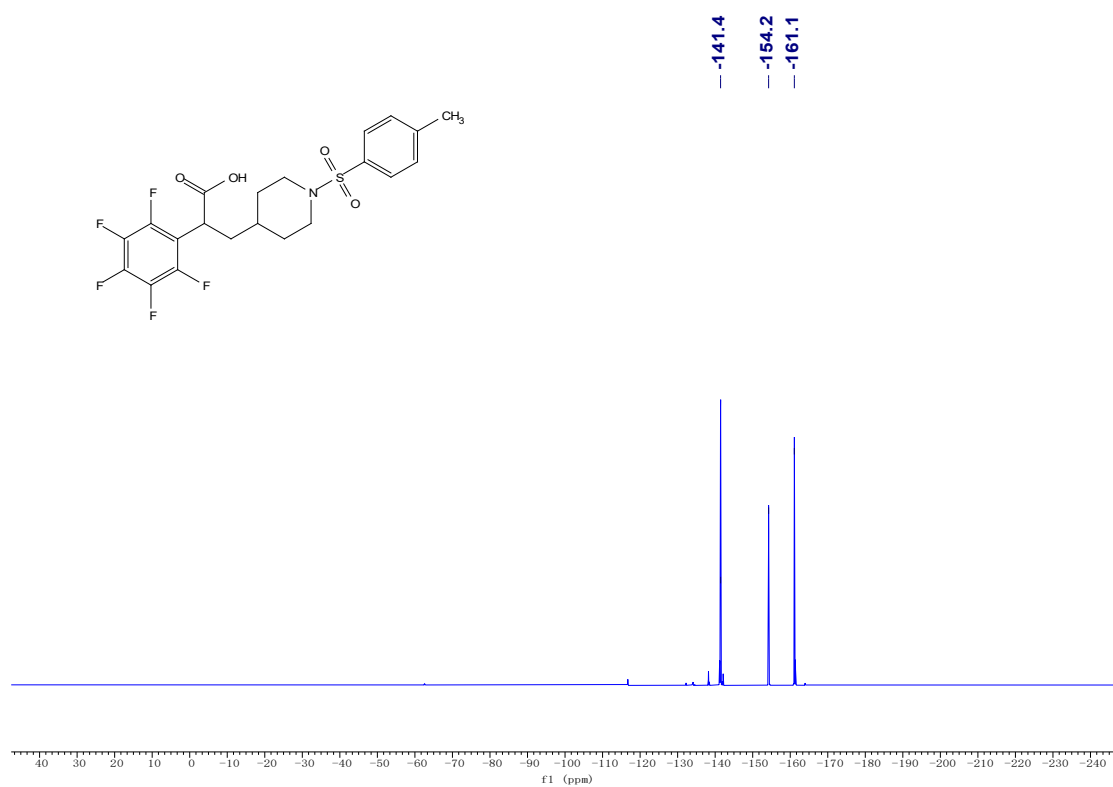

# 4g

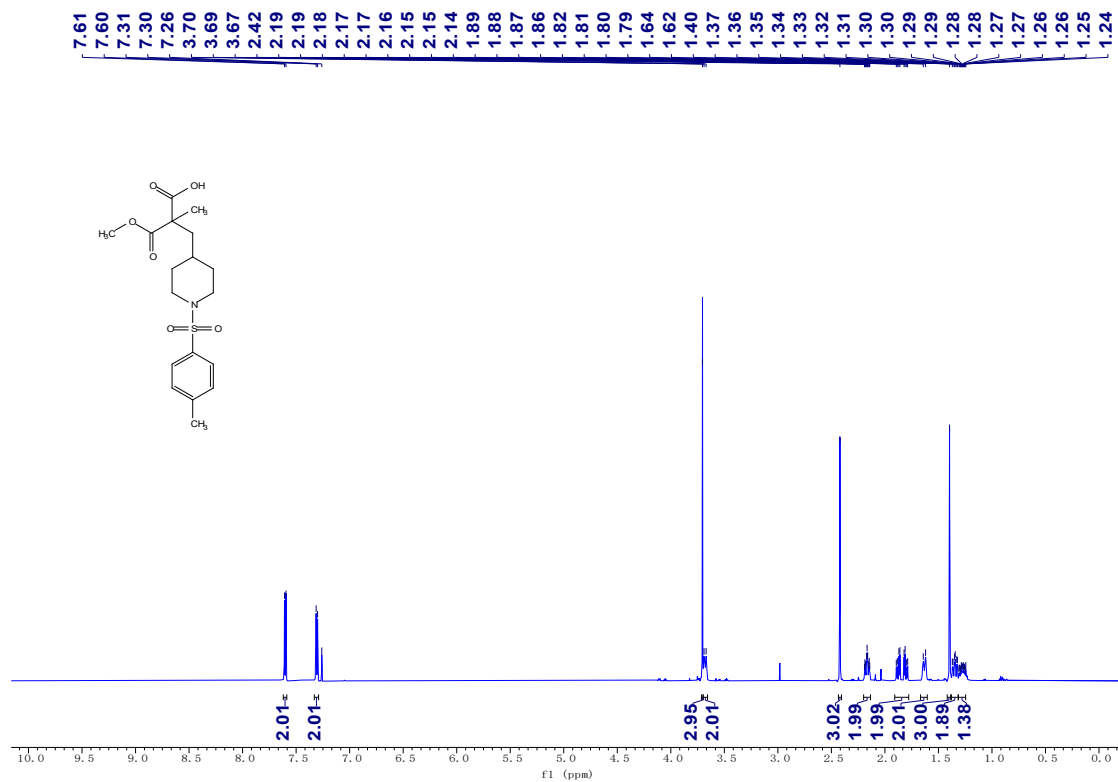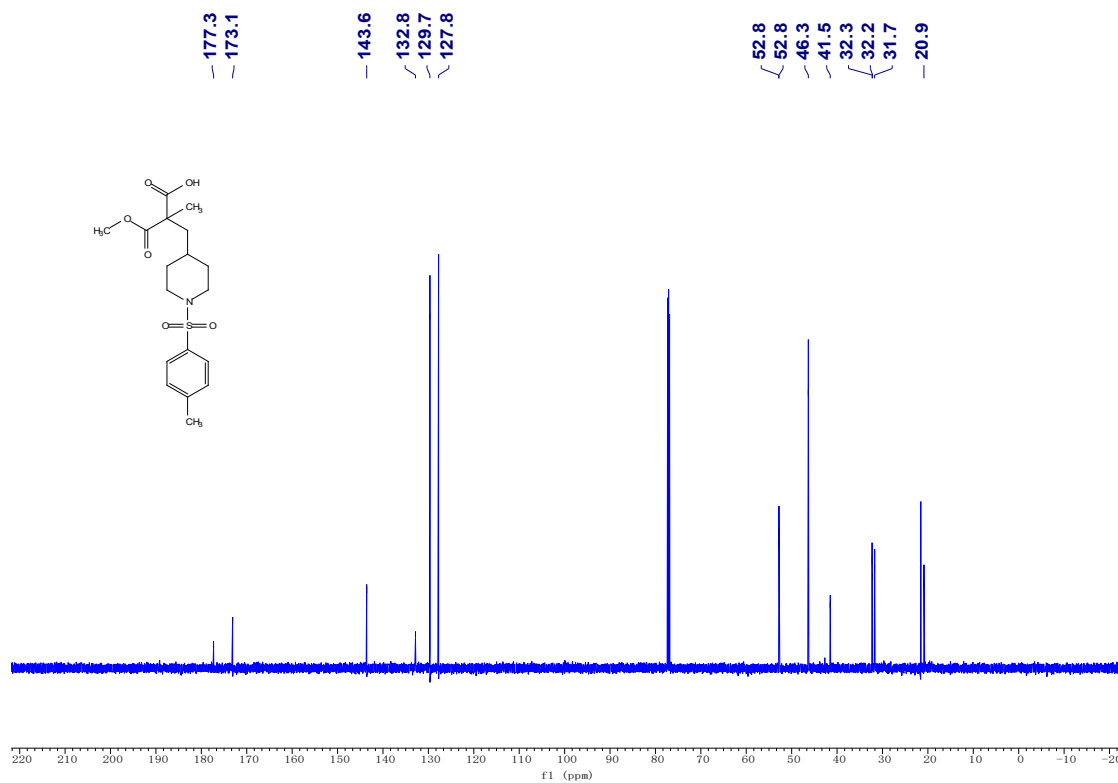

4h

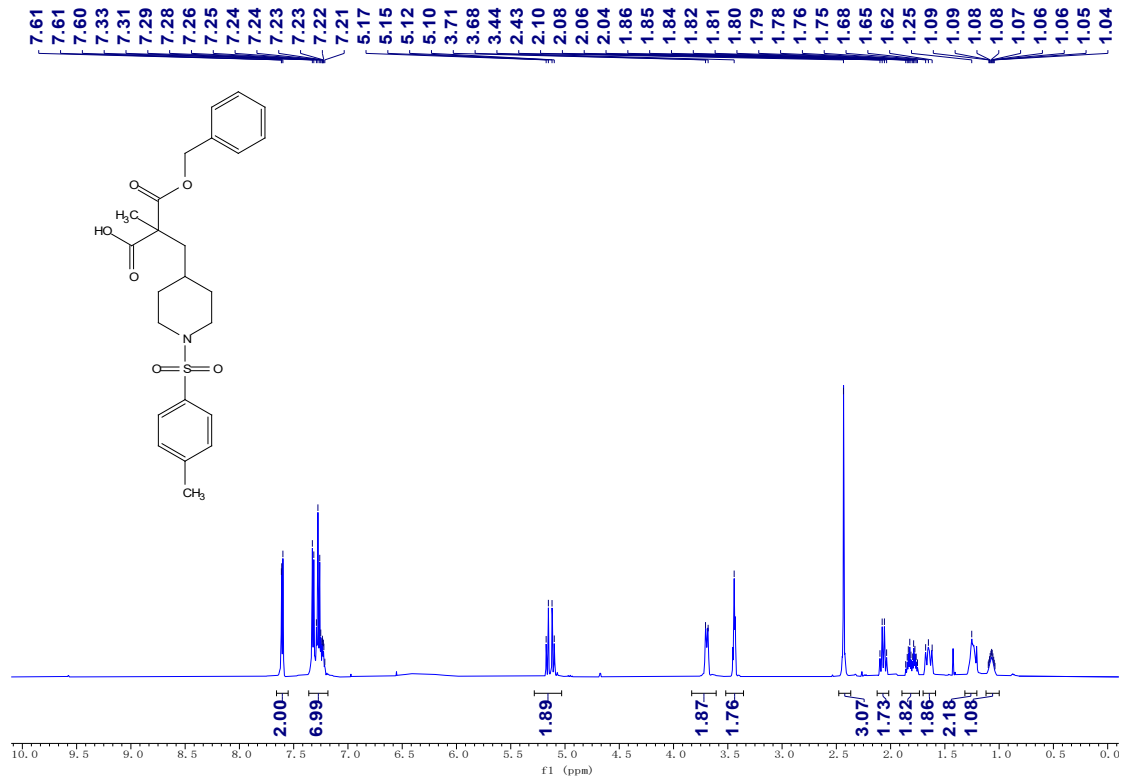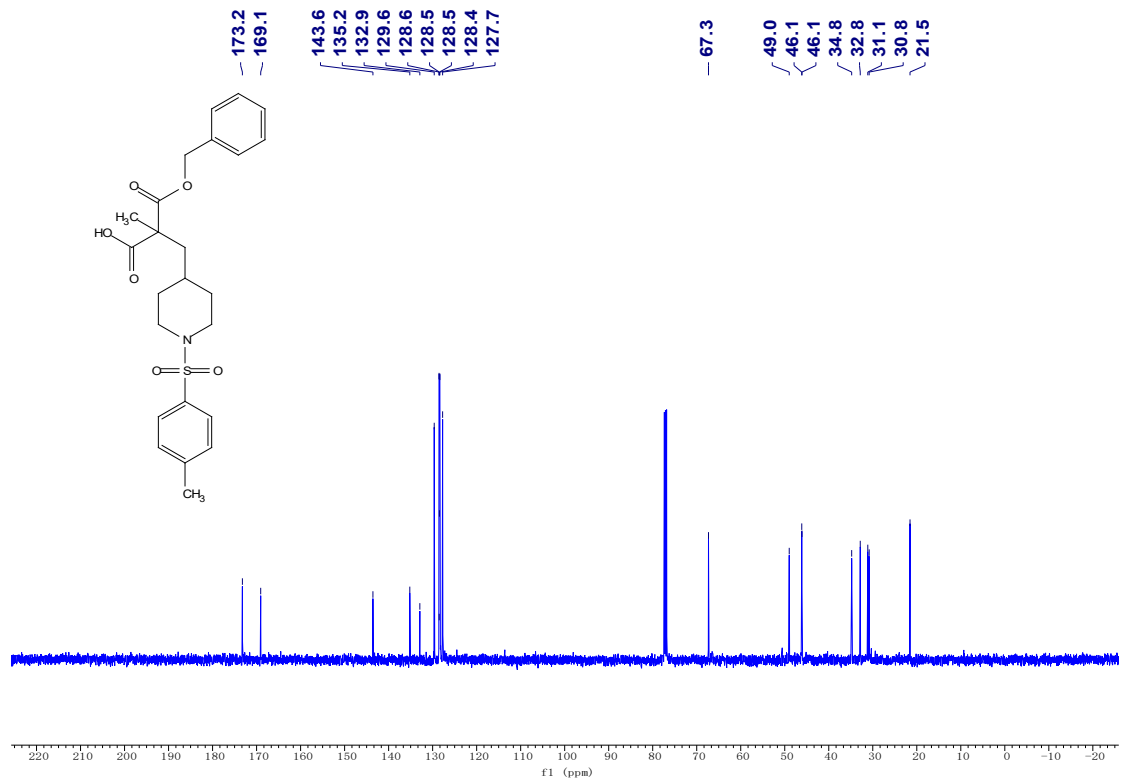

# 4i

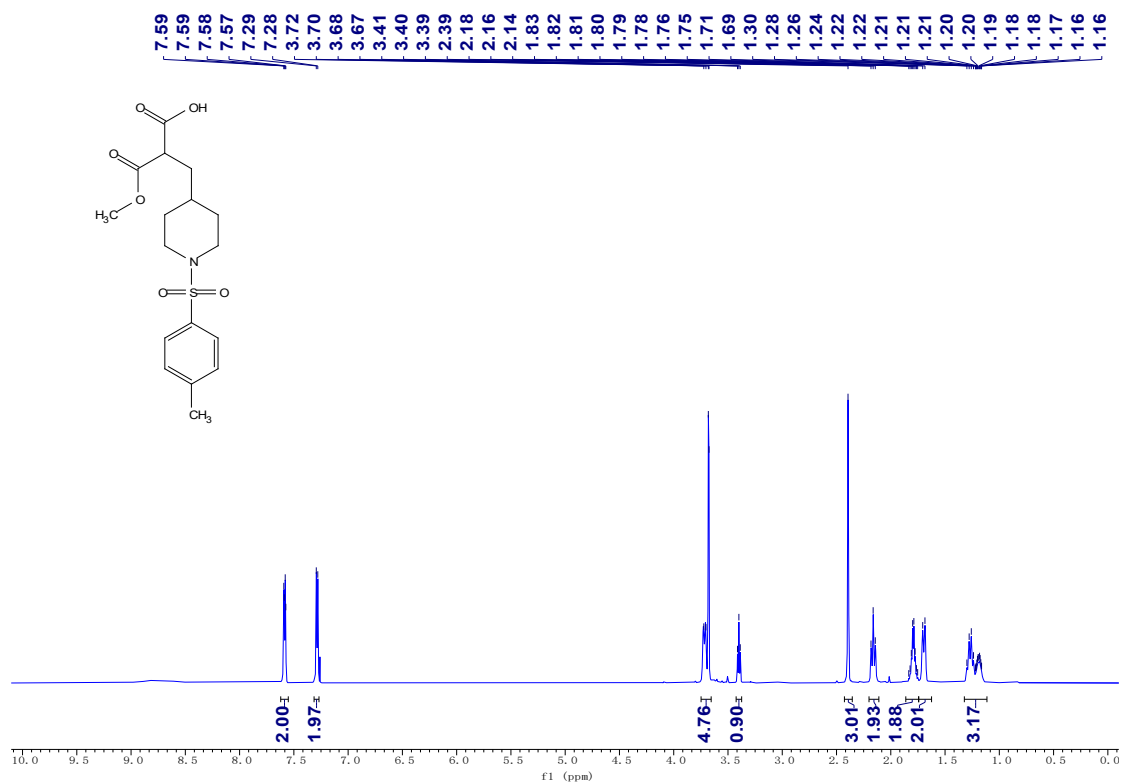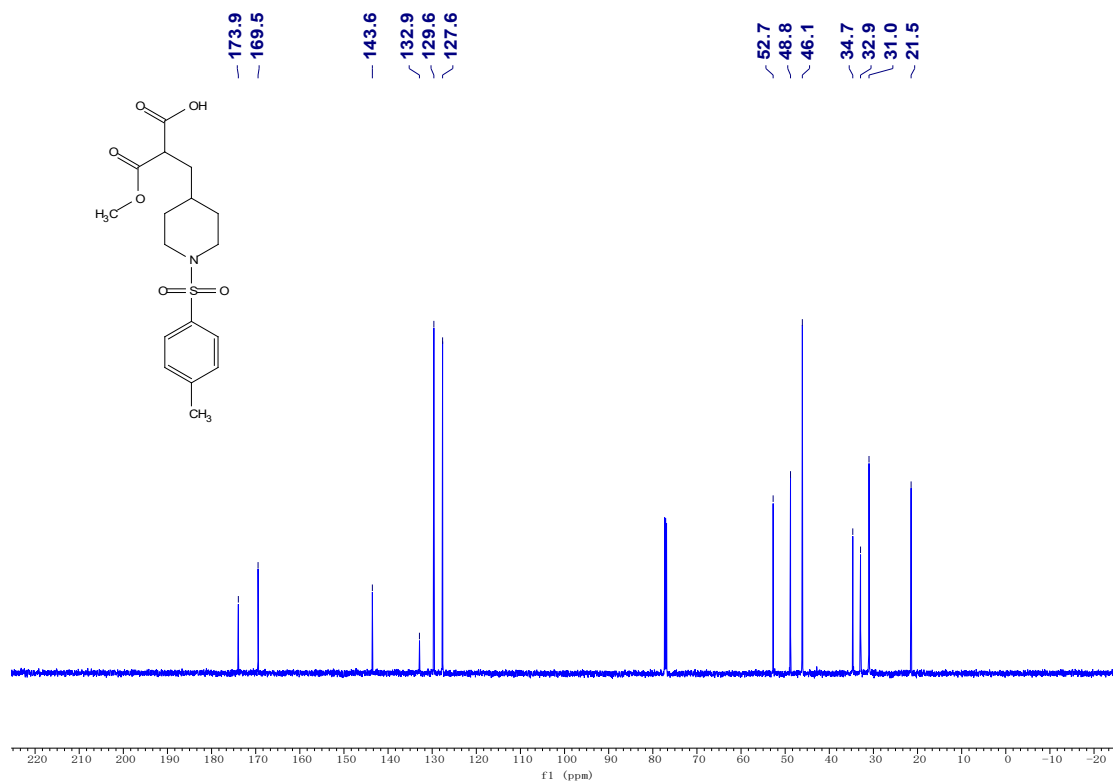

# 4j

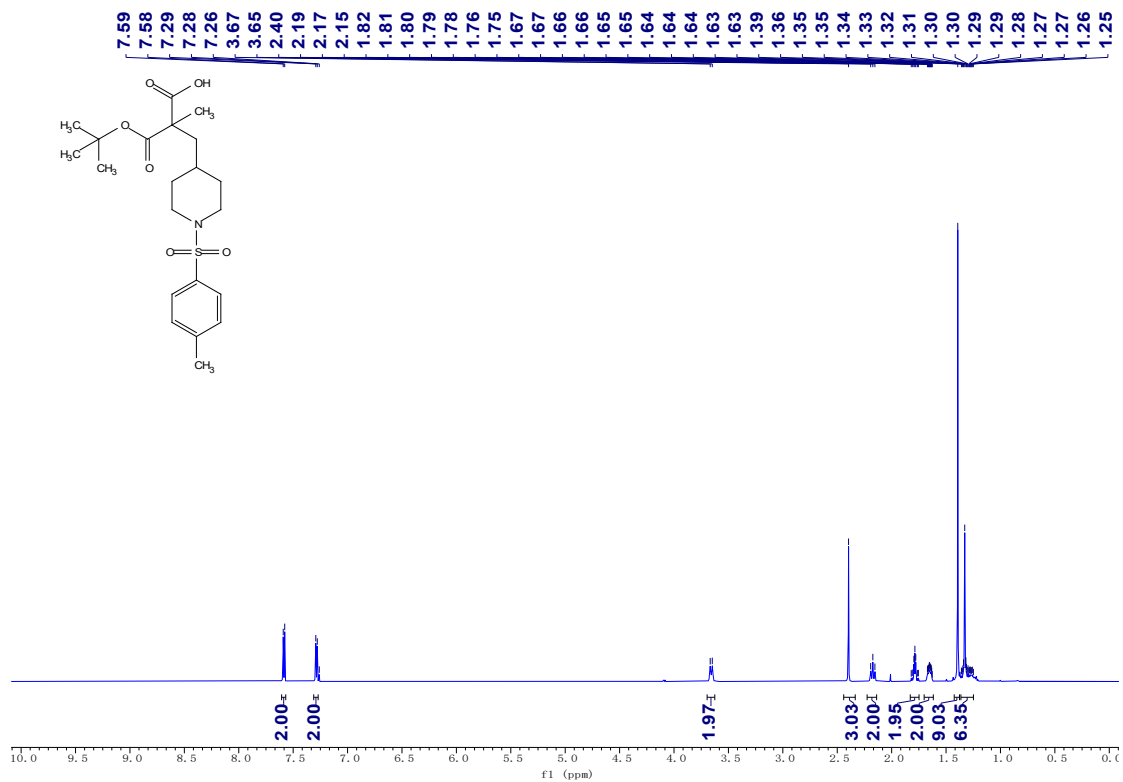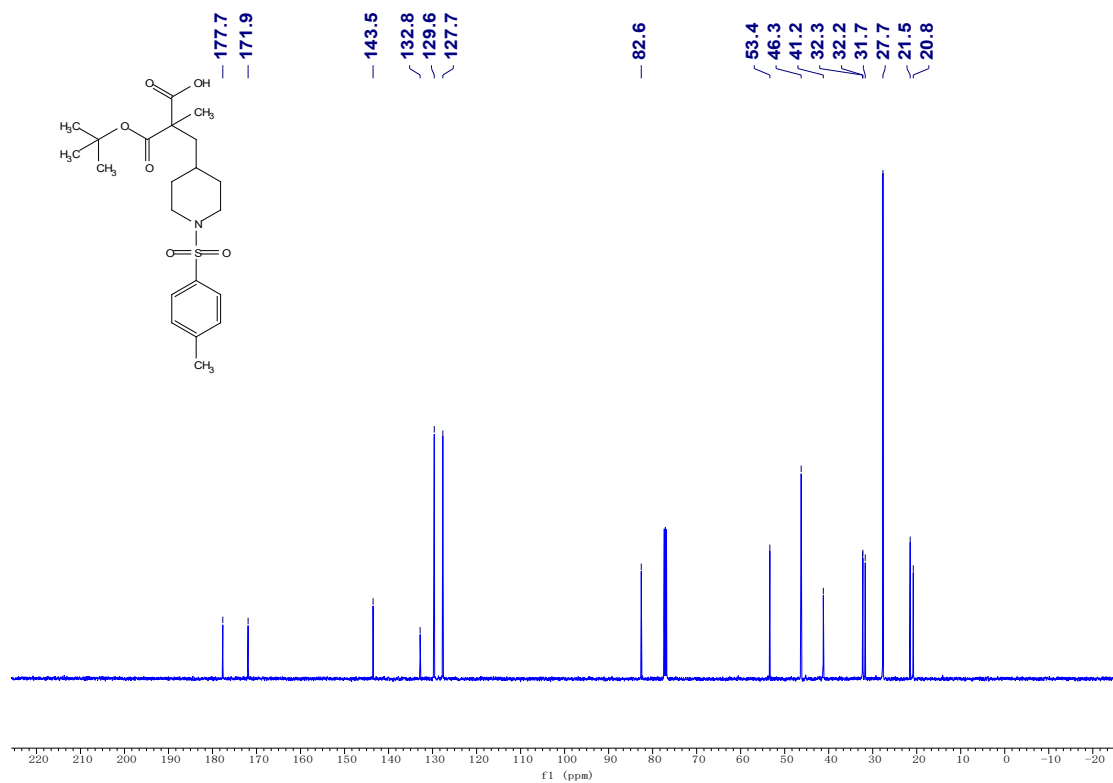

4k

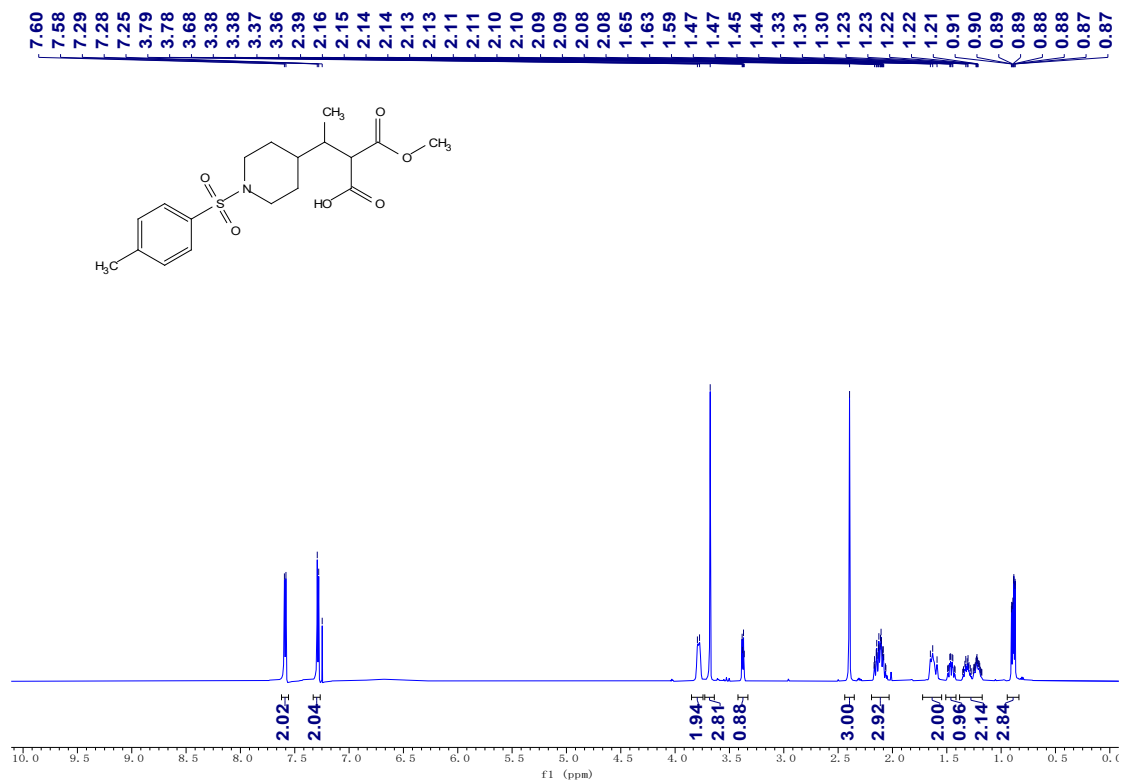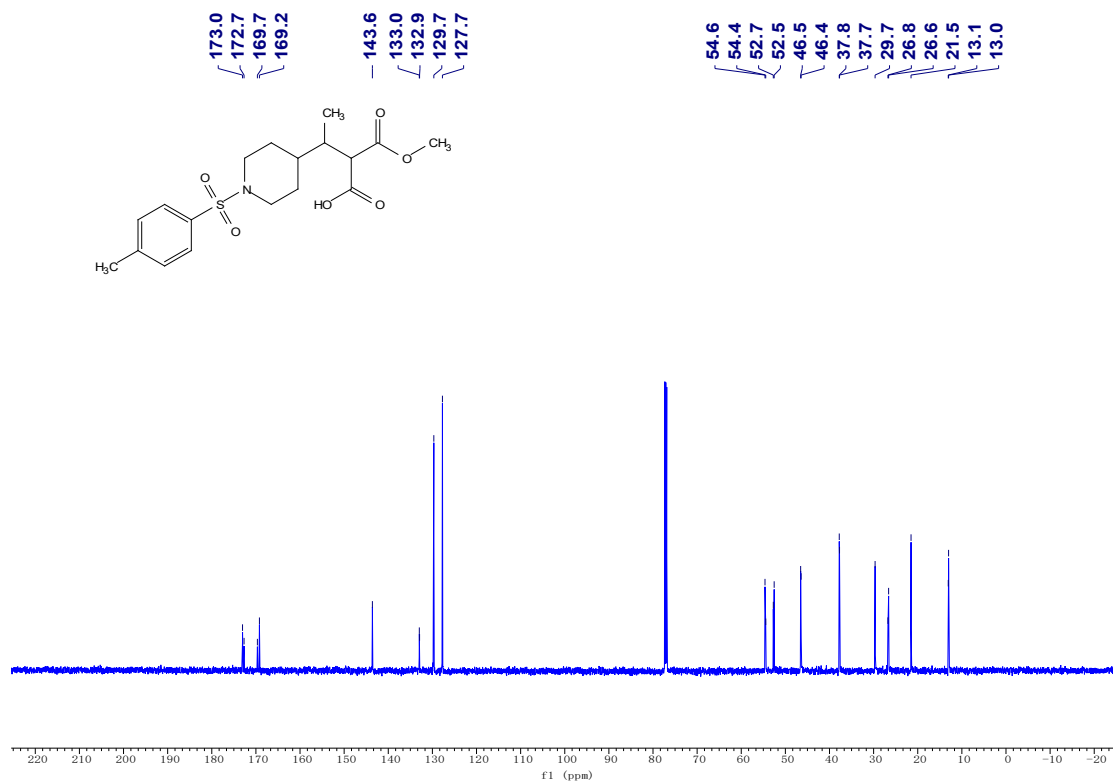

# 4I

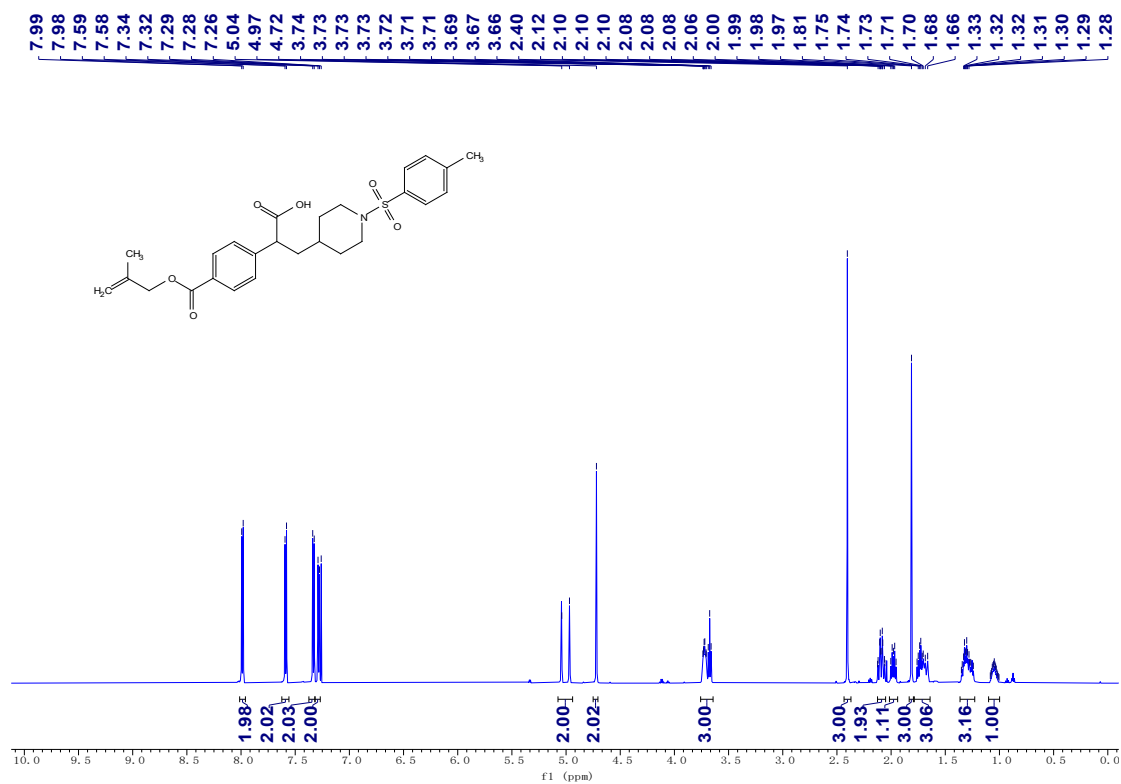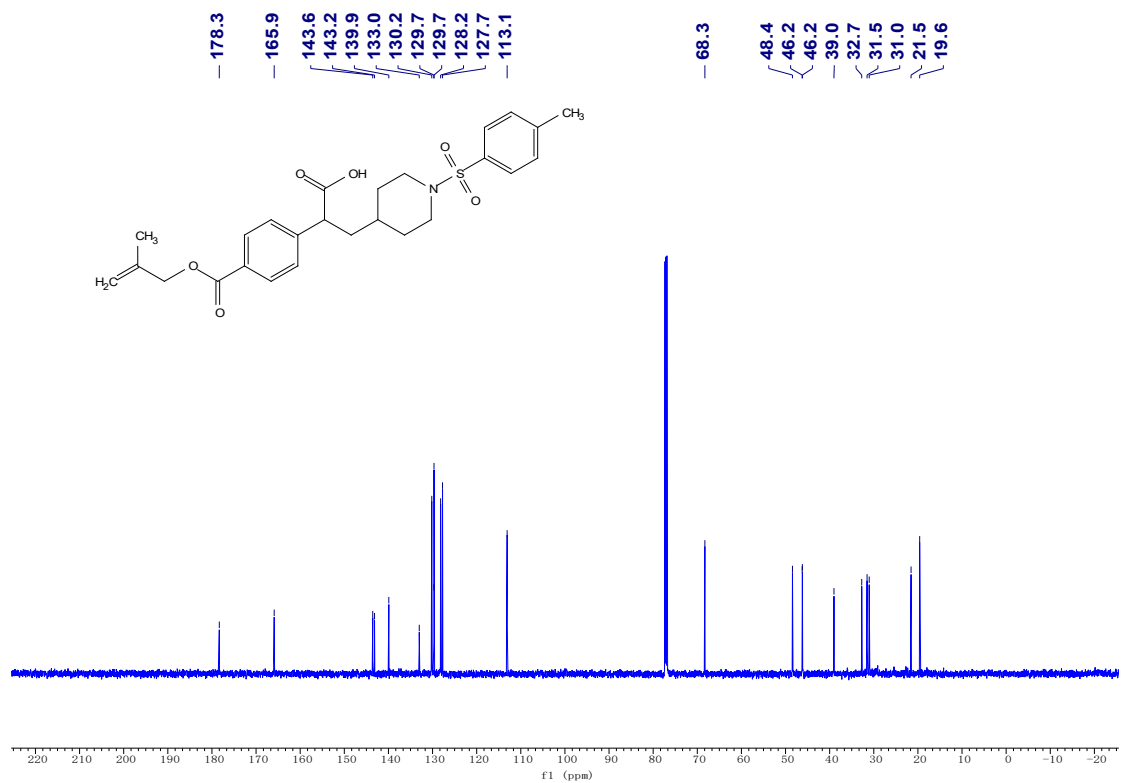



4m

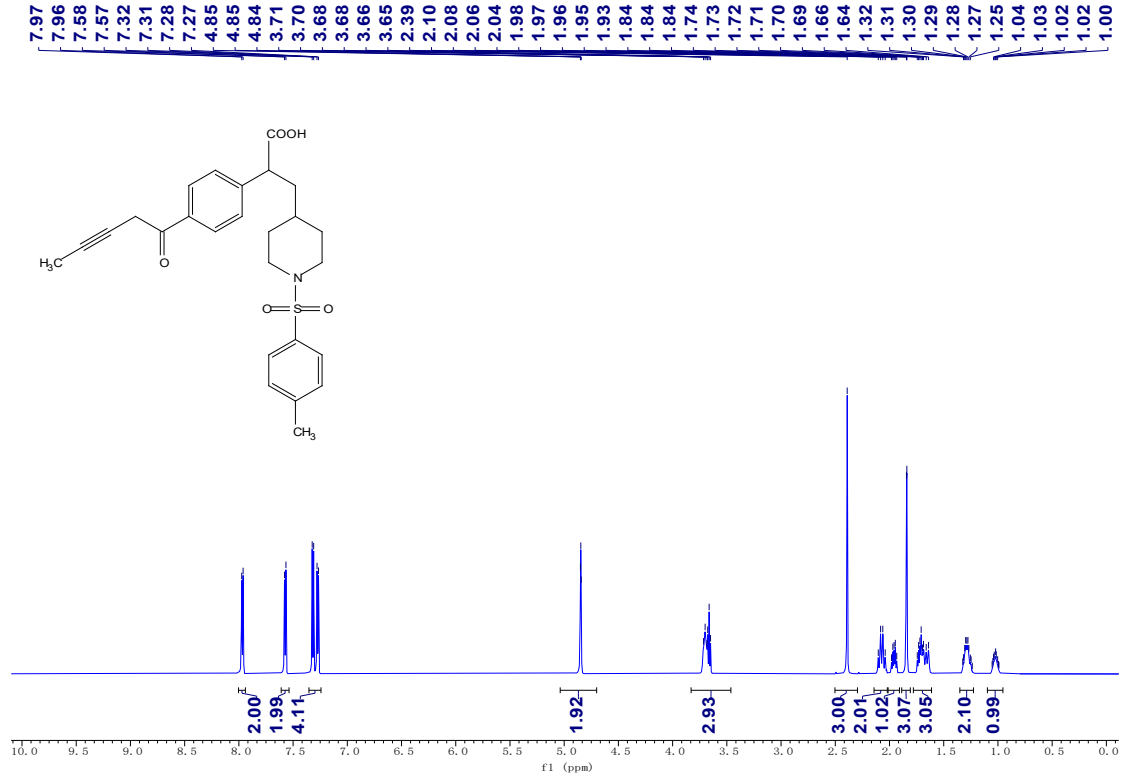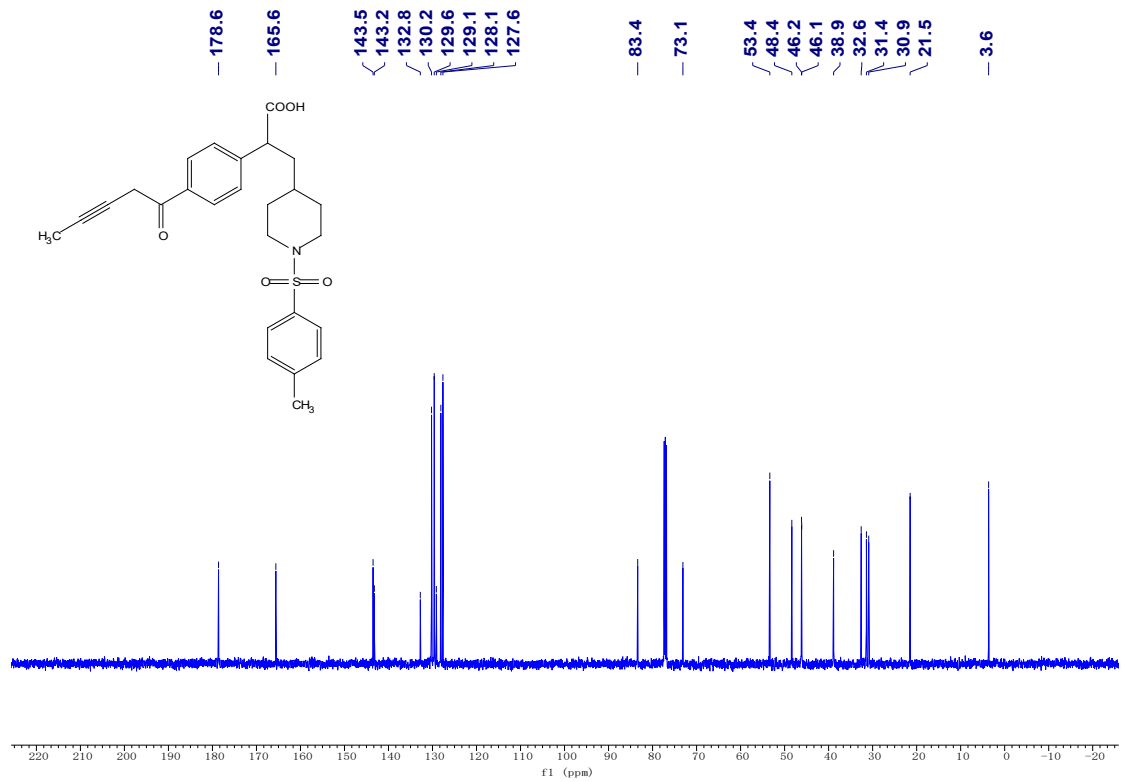

4n

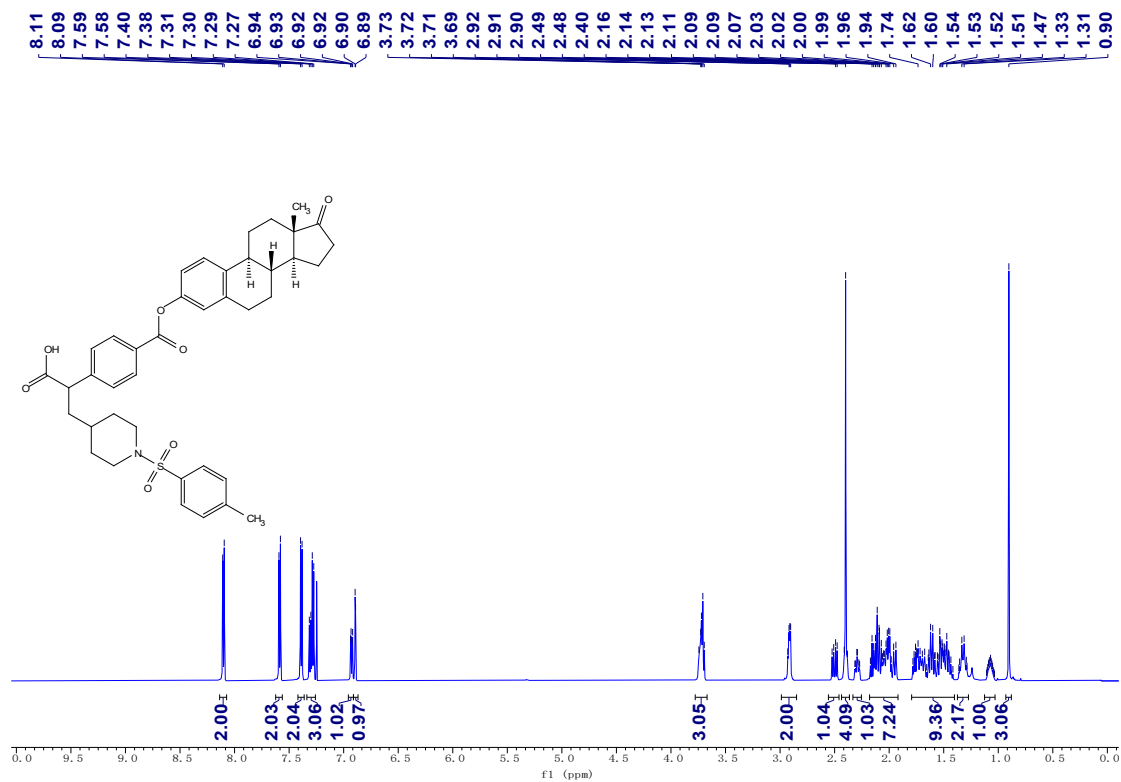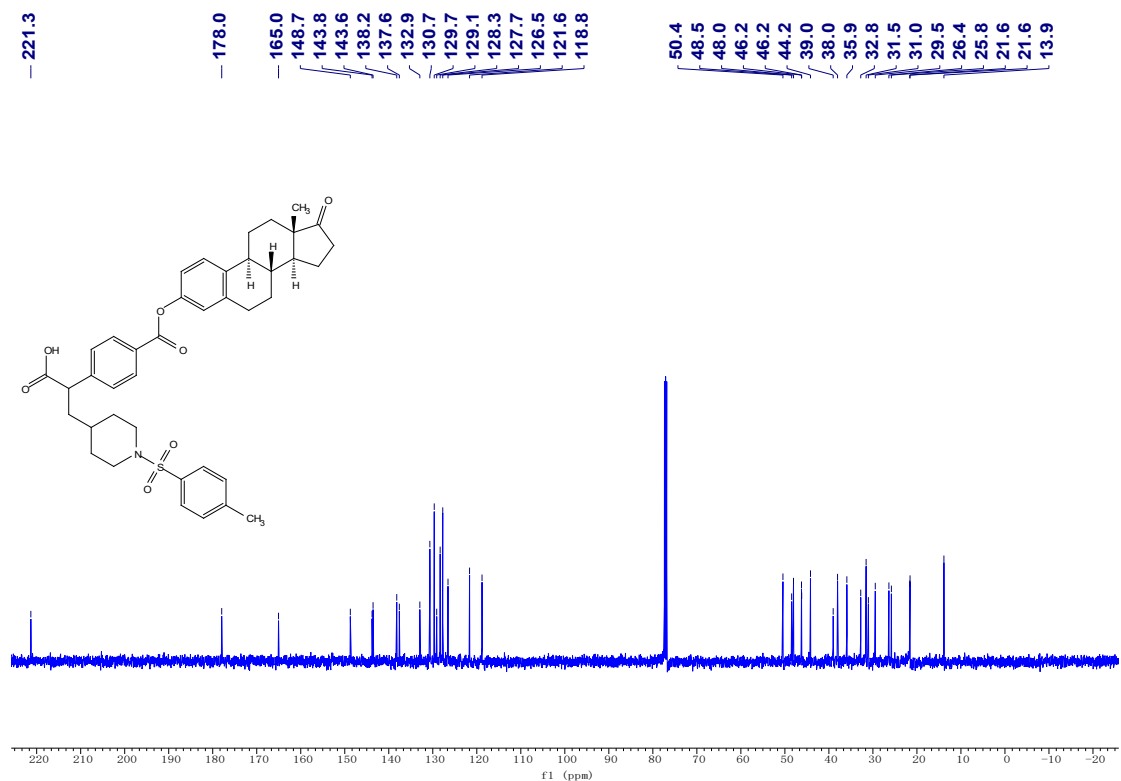

Supplement: d3qo01012k1.pdf [file d3qo01012k1.pdf]
